# Supplementary material
Source: PubMed Central journal article supplement (PMC2857637)
Supplement: supp_109.081513_biolreprod.109.081513-2.pdf [file supp_109.081513_biolreprod.109.081513-2.pdf]

**Franco et al., Supplemental Table S1. Applied Biosystems Assay Identification for Real time RT-PCR Analysis.**

| <b>Gene</b>    | <b>Assay Identification</b> |
|----------------|-----------------------------|
| <i>Ptch1</i>   | Mm00970977_m1               |
| <i>Nr2f2</i>   | Mm00772789_m1               |
| <i>Gli1</i>    | Mm00494654_m1               |
| <i>Bmp2</i>    | Mm01340178_m1               |
| <i>Wnt4</i>    | Mm00434341_m1               |
| <i>Foxa2</i>   | Mm00839704_mH               |
| <i>Wnt5a</i>   | Mm00437347_m1               |
| <i>Pdgn</i>    | Mm00494716_m1               |
| <i>Has2</i>    | Mm00515089_m1               |
| <i>Col11a1</i> | Mm00483387_m1               |
| <i>Lama2</i>   | Mm00550083_m1               |
| <i>Bgn</i>     | Mm00455918_m1               |
| <i>Fmod</i>    | Mm00491215_m1               |
| <i>Pthlh</i>   | Mm00436057_m1               |
| <i>Pthr1</i>   | Mm00441046_m1               |
| <i>Crtap</i>   | Mm00517335_m1               |

**Franco et al., Supplemental Table S2. Genes Increased Upon Smo Activation.**

| Probe Set    | Gene Symbol                | Gene Title                                                                     | Fold Change |
|--------------|----------------------------|--------------------------------------------------------------------------------|-------------|
| 1455277_at   | <i>Hhip</i>                | Hedgehog-interacting protein                                                   | 692.36      |
| 1438083_at   | <i>Hhip</i>                | Hedgehog-interacting protein                                                   | 310.86      |
| 1421426_at   | <i>Hhip</i>                | Hedgehog-interacting protein                                                   | 237.67      |
| 1460347_at   | <i>Krt14</i>               | keratin 14                                                                     | 103.80      |
| 1424096_at   | <i>Krt5</i>                | keratin 5                                                                      | 84.49       |
| 1425425_a_at | <i>Wif1</i>                | Wnt inhibitory factor 1                                                        | 81.76       |
| 1460129_at   | <i>Slc6a2</i>              | solute carrier family 6 (neurotransmitter transporter, noradrenalin), member 2 | 75.98       |
| 1417867_at   | <i>Cfd</i>                 | complement factor D (adipsin)                                                  | 73.94       |
| 1457256_x_at | <i>Ptch2</i> /// LOC674483 | patched homolog 2 /// similar to Protein patched homolog 2 (PTC2)              | 64.72       |
| 1456084_x_at | <i>Fmod</i>                | fibromodulin                                                                   | 61.40       |
| 1437933_at   | <i>Hhip</i>                | Hedgehog-interacting protein                                                   | 52.53       |
| 1434354_at   | <i>Maob</i>                | monoamine oxidase B                                                            | 51.90       |
| 1442180_at   | <i>Dleu7</i>               | deleted in lymphocytic leukemia, 7                                             | 49.51       |
| 1426225_at   | <i>Rbp4</i>                | retinol binding protein 4, plasma                                              | 45.23       |
| 1437685_x_at | <i>Fmod</i>                | fibromodulin                                                                   | 42.96       |
| 1423285_at   | <i>Coch</i>                | coagulation factor C homolog (Limulus polyphemus)                              | 40.37       |
| 1437718_x_at | <i>Fmod</i>                | fibromodulin                                                                   | 39.31       |
| 1449251_at   | <i>Ndph</i>                | Norrie disease homolog                                                         | 36.29       |
| 1449058_at   | <i>Gli1</i>                | GLI-Kruppel family member GLI1                                                 | 33.65       |
| 1438966_x_at | <i>Fmod</i>                | fibromodulin                                                                   | 32.99       |
| 1460049_s_at | <i>1500015O10Rik</i>       | RIKEN cDNA 1500015O10 gene                                                     | 32.89       |
| 1437060_at   | <i>Olfm4</i>               | olfactomedin 4                                                                 | 32.41       |
| 1415939_at   | <i>Fmod</i>                | fibromodulin                                                                   | 32.40       |
| 1420970_at   | <i>Adcy7</i>               | adenylate cyclase 7                                                            | 30.94       |
| 1442315_at   | <i>AI426778</i>            | expressed sequence AI426778                                                    | 29.88       |
| 1416612_at   | <i>Cyp1b1</i>              | cytochrome P450, family 1, subfamily b, polypeptide 1                          | 26.32       |
| 1456197_x_at | ---                        | Transcribed locus                                                              | 25.27       |
| 1422655_at   | <i>Ptch2</i>               | patched homolog 2                                                              | 24.01       |
| 1437324_x_at | <i>Fmod</i>                | fibromodulin                                                                   | 21.80       |
| 1416613_at   | <i>Cyp1b1</i>              | cytochrome P450, family 1, subfamily b, polypeptide 1                          | 21.60       |
| 1426231_at   | <i>Vit</i>                 | vitrin                                                                         | 21.40       |
| 1423261_at   | <i>1500015O10Rik</i>       | RIKEN cDNA 1500015O10 gene                                                     | 20.56       |
| 1448083_at   | <i>LOC675405</i>           | similar to voltage gated channel like 1                                        | 20.32       |
| 1418457_at   | <i>Cxcl14</i>              | chemokine (C-X-C motif) ligand 14                                              | 19.98       |
| 1422651_at   | <i>Adipoq</i>              | adiponectin, C1Q and collagen domain containing                                | 18.25       |
| 1450990_at   | <i>Gpc3</i>                | glypican 3                                                                     | 18.23       |
| 1428853_at   | <i>Ptch1</i>               | patched homolog 1                                                              | 18.22       |
| 1436425_at   | <i>Ankrd38</i>             | ankyrin repeat domain 38                                                       | 17.33       |
| 1441776_at   | <i>Tspan11</i>             | tetraspanin 11                                                                 | 17.09       |
| 1449340_at   | <i>Sostdc1</i>             | sclerostin domain containing 1                                                 | 16.81       |
| 1430310_at   | <i>Tspan11</i>             | tetraspanin 11                                                                 | 15.92       |
| 1450014_at   | <i>Cldn1</i>               | claudin 1                                                                      | 15.64       |
| 1429974_at   | <i>Tbx18</i>               | T-box18                                                                        | 15.47       |
| 1438042_at   | <i>Shox2</i>               | short stature homeobox 2                                                       | 14.83       |

|              |                                                                                                                          |                                                                                                                                                                                                                                                                                                                                                                                                                                                               |       |
|--------------|--------------------------------------------------------------------------------------------------------------------------|---------------------------------------------------------------------------------------------------------------------------------------------------------------------------------------------------------------------------------------------------------------------------------------------------------------------------------------------------------------------------------------------------------------------------------------------------------------|-------|
| 1437932_a_at | <i>Cldn1</i>                                                                                                             | claudin 1                                                                                                                                                                                                                                                                                                                                                                                                                                                     | 14.72 |
| 1453523_at   | <i>A030006P16Rik</i>                                                                                                     | RIKEN cDNA A030006P16 gene                                                                                                                                                                                                                                                                                                                                                                                                                                    | 14.03 |
| 1455426_at   | ---                                                                                                                      | ---                                                                                                                                                                                                                                                                                                                                                                                                                                                           | 14.02 |
| 1431335_a_at | <i>Wfdc1</i>                                                                                                             | WAP four-disulfide core domain 1                                                                                                                                                                                                                                                                                                                                                                                                                              | 13.89 |
| 1416371_at   | <i>Apod</i>                                                                                                              | apolipoprotein D                                                                                                                                                                                                                                                                                                                                                                                                                                              | 13.56 |
| 1438662_at   | <i>LOC433810</i>                                                                                                         | similar to transmembrane protein SHREW1                                                                                                                                                                                                                                                                                                                                                                                                                       | 13.40 |
| 1445860_at   | <i>Tspan11</i>                                                                                                           | tetraspanin 11                                                                                                                                                                                                                                                                                                                                                                                                                                                | 13.34 |
| 1457423_at   | <i>LOC675405</i>                                                                                                         | similar to voltage gated channel like 1                                                                                                                                                                                                                                                                                                                                                                                                                       | 13.28 |
| 1450861_at   | <i>Fancc</i>                                                                                                             | Fanconi anemia, complementation group C                                                                                                                                                                                                                                                                                                                                                                                                                       | 13.24 |
| 1456307_s_at | <i>Adcy7</i>                                                                                                             | adenylate cyclase 7                                                                                                                                                                                                                                                                                                                                                                                                                                           | 13.18 |
| 1451406_a_at | <i>Pcsk5</i>                                                                                                             | proprotein convertase subtilisin/kexin type 5                                                                                                                                                                                                                                                                                                                                                                                                                 | 12.71 |
| 1419711_at   | <i>Cd7</i>                                                                                                               | CD7 antigen                                                                                                                                                                                                                                                                                                                                                                                                                                                   | 12.64 |
| 1455304_at   | <i>Unc13c</i>                                                                                                            | unc-13 homolog C ( <i>C. elegans</i> )                                                                                                                                                                                                                                                                                                                                                                                                                        | 12.62 |
| 1425575_at   | <i>Epha3</i>                                                                                                             | Eph receptor A3                                                                                                                                                                                                                                                                                                                                                                                                                                               | 12.57 |
| 1450065_at   | <i>Adcy7</i>                                                                                                             | adenylate cyclase 7                                                                                                                                                                                                                                                                                                                                                                                                                                           | 12.53 |
| 1437339_s_at | <i>Pcsk5</i>                                                                                                             | proprotein convertase subtilisin/kexin type 5                                                                                                                                                                                                                                                                                                                                                                                                                 | 12.22 |
| 1449533_at   | <i>Tmem100</i>                                                                                                           | transmembrane protein 100                                                                                                                                                                                                                                                                                                                                                                                                                                     | 12.17 |
| 1418456_a_at | <i>Cxcl14</i>                                                                                                            | chemokine (C-X-C motif) ligand 14                                                                                                                                                                                                                                                                                                                                                                                                                             | 12.10 |
| 1423671_at   | <i>Dner</i>                                                                                                              | delta/notch-like EGF-related receptor                                                                                                                                                                                                                                                                                                                                                                                                                         | 11.81 |
| 1424010_at   | <i>Mfap4</i>                                                                                                             | microfibrillar-associated protein 4                                                                                                                                                                                                                                                                                                                                                                                                                           | 11.66 |
| 1456379_x_at | <i>Dner</i>                                                                                                              | delta/notch-like EGF-related receptor                                                                                                                                                                                                                                                                                                                                                                                                                         | 11.21 |
| 1439795_at   | <i>Gpr64</i>                                                                                                             | G protein-coupled receptor 64                                                                                                                                                                                                                                                                                                                                                                                                                                 | 11.17 |
| 1450824_at   | <i>Ptch1</i>                                                                                                             | patched homolog 1                                                                                                                                                                                                                                                                                                                                                                                                                                             | 11.12 |
| 1423135_at   | <i>Thy1</i>                                                                                                              | thymus cell antigen 1, theta                                                                                                                                                                                                                                                                                                                                                                                                                                  | 10.99 |
| 1438350_at   | <i>Gpr64</i>                                                                                                             | G protein-coupled receptor 64                                                                                                                                                                                                                                                                                                                                                                                                                                 | 10.91 |
| 1425574_at   | <i>Epha3</i>                                                                                                             | Eph receptor A3                                                                                                                                                                                                                                                                                                                                                                                                                                               | 10.53 |
| 1449154_at   | <i>Col11a1</i>                                                                                                           | procollagen, type XI, alpha 1                                                                                                                                                                                                                                                                                                                                                                                                                                 | 10.48 |
| 1418603_at   | <i>Avpr1a</i>                                                                                                            | arginine vasopressin receptor 1A                                                                                                                                                                                                                                                                                                                                                                                                                              | 10.14 |
| 1417447_at   | <i>Tcf21</i>                                                                                                             | transcription factor 21                                                                                                                                                                                                                                                                                                                                                                                                                                       | 9.99  |
| 1425417_x_at | <i>Klra8</i> /// <i>Klra21</i> ///<br><i>LOC640965</i> /// <i>Klra29</i> ///<br><i>LOC667769</i> ///<br><i>LOC673223</i> | killer cell lectin-like receptor, subfamily A, member 8 /// killer cell lectin-like receptor subfamily A, member 21 /// similar to killer cell lectin-like receptor subfamily A, member 21 /// killer cell lectin-like receptor subfamily A member 29 /// similar to killer cell lectin-like receptor subfamily A, member 21 /// similar to Killer cell lectin-like receptor 8 (T-cell surface glycoprotein Ly-49H) (Ly49-H antigen) (Lymphocyte antigen 49H) | 9.81  |
| 1442187_at   | <i>Bdkrb2</i>                                                                                                            | bradykinin receptor, beta 2                                                                                                                                                                                                                                                                                                                                                                                                                                   | 9.78  |
| 1436626_at   | <i>Tspan11</i>                                                                                                           | tetraspanin 11                                                                                                                                                                                                                                                                                                                                                                                                                                                | 9.76  |
| 1455956_x_at | <i>Ccnd2</i>                                                                                                             | cyclin D2                                                                                                                                                                                                                                                                                                                                                                                                                                                     | 9.68  |
| 1418652_at   | <i>Cxcl9</i>                                                                                                             | chemokine (C-X-C motif) ligand 9                                                                                                                                                                                                                                                                                                                                                                                                                              | 9.62  |
| 1430779_at   | <i>Ntn1</i>                                                                                                              | netrin G1                                                                                                                                                                                                                                                                                                                                                                                                                                                     | 9.34  |
| 1416111_at   | <i>Cd83</i>                                                                                                              | CD83 antigen                                                                                                                                                                                                                                                                                                                                                                                                                                                  | 9.24  |
| 1448742_at   | <i>Snai1</i>                                                                                                             | snail homolog 1 ( <i>Drosophila</i> )                                                                                                                                                                                                                                                                                                                                                                                                                         | 9.16  |
| 1455656_at   | <i>Btla</i>                                                                                                              | B and T lymphocyte associated                                                                                                                                                                                                                                                                                                                                                                                                                                 | 9.02  |

|              |                                                                                                                                                |                                                                                                                                                                                                                                                                                                                                                                              |      |
|--------------|------------------------------------------------------------------------------------------------------------------------------------------------|------------------------------------------------------------------------------------------------------------------------------------------------------------------------------------------------------------------------------------------------------------------------------------------------------------------------------------------------------------------------------|------|
| 1447513_at   | <i>Kcnd3</i>                                                                                                                                   | potassium voltage-gated channel, Shal-related family, member 3                                                                                                                                                                                                                                                                                                               | 8.96 |
| 1425436_x_at | <i>Klra3</i>                                                                                                                                   | killer cell lectin-like receptor, subfamily A, member 3                                                                                                                                                                                                                                                                                                                      | 8.90 |
| 1454734_at   | ---                                                                                                                                            | ---                                                                                                                                                                                                                                                                                                                                                                          | 8.66 |
| 1425039_at   | <i>Itgbl1</i>                                                                                                                                  | integrin, beta-like 1                                                                                                                                                                                                                                                                                                                                                        | 8.64 |
| 1448021_at   | ---                                                                                                                                            | Transcribed locus                                                                                                                                                                                                                                                                                                                                                            | 8.55 |
| 1454838_s_at | <i>AW548124</i>                                                                                                                                | expressed sequence AW548124                                                                                                                                                                                                                                                                                                                                                  | 8.55 |
| 1417963_at   | <i>Pltp</i>                                                                                                                                    | phospholipid transfer protein                                                                                                                                                                                                                                                                                                                                                | 8.51 |
| 1434745_at   | <i>Ccnd2</i>                                                                                                                                   | cyclin D2                                                                                                                                                                                                                                                                                                                                                                    | 8.50 |
| 1430127_a_at | <i>Ccnd2</i>                                                                                                                                   | cyclin D2                                                                                                                                                                                                                                                                                                                                                                    | 8.25 |
| 1429381_x_at | <i>Igh-VJ558</i> /// <i>LOC238447</i> /// <i>LOC544903</i> /// <i>LOC544907</i> /// <i>LOC633774</i> /// <i>LOC676478</i> /// <i>LOC677563</i> | immunoglobulin heavy chain (J558 family) /// similar to immunoglobulin heavy chain variable region /// similar to immunoglobulin mu-chain /// similar to anti-poly(dC) monoclonal antibody heavy chain /// similar to Ig heavy chain V region 23 precursor /// similar to Ig heavy chain V region 102 precursor /// similar to Ig heavy chain V region VH558 A1/A4 precursor | 8.04 |
| 1439543_at   | <i>1110064A23Rik</i>                                                                                                                           | RIKEN cDNA 1110064A23 gene                                                                                                                                                                                                                                                                                                                                                   | 8.01 |
| 1416122_at   | <i>Ccnd2</i>                                                                                                                                   | cyclin D2                                                                                                                                                                                                                                                                                                                                                                    | 7.96 |
| 1458082_at   | <i>Cd200</i>                                                                                                                                   | Cd200 antigen                                                                                                                                                                                                                                                                                                                                                                | 7.95 |
| 1449434_at   | <i>Car3</i>                                                                                                                                    | carbonic anhydrase 3                                                                                                                                                                                                                                                                                                                                                         | 7.88 |
| 1455436_at   | <i>Diras2</i>                                                                                                                                  | DIRAS family, GTP-binding RAS-like 2                                                                                                                                                                                                                                                                                                                                         | 7.88 |
| 1426155_a_at | <i>Osr2</i>                                                                                                                                    | odd-skipped related 2 (Drosophila)                                                                                                                                                                                                                                                                                                                                           | 7.86 |
| 1418799_a_at | <i>Col17a1</i>                                                                                                                                 | procollagen, type XVII, alpha 1                                                                                                                                                                                                                                                                                                                                              | 7.83 |
| 1431362_a_at | <i>Smoc2</i>                                                                                                                                   | SPARC related modular calcium binding 2                                                                                                                                                                                                                                                                                                                                      | 7.77 |
| 1417168_a_at | <i>Usp2</i>                                                                                                                                    | ubiquitin specific peptidase 2                                                                                                                                                                                                                                                                                                                                               | 7.75 |
| 1460411_s_at | <i>AW548124</i>                                                                                                                                | expressed sequence AW548124                                                                                                                                                                                                                                                                                                                                                  | 7.64 |
| 1451547_at   | <i>lyd</i>                                                                                                                                     | iodotyrosine deiodinase                                                                                                                                                                                                                                                                                                                                                      | 7.58 |
| 1429682_at   | <i>4930431B09Rik</i>                                                                                                                           | RIKEN cDNA 4930431B09 gene                                                                                                                                                                                                                                                                                                                                                   | 7.54 |
| 1418259_a_at | <i>Entpd2</i>                                                                                                                                  | ectonucleoside triphosphate diphosphohydrolase 2                                                                                                                                                                                                                                                                                                                             | 7.51 |
| 1460187_at   | <i>Sfrp1</i>                                                                                                                                   | secreted frizzled-related sequence protein 1                                                                                                                                                                                                                                                                                                                                 | 7.31 |
| 1449286_at   | <i>Ntnq1</i>                                                                                                                                   | netrin G1                                                                                                                                                                                                                                                                                                                                                                    | 7.27 |
| 1430523_s_at | <i>Igl-V1</i>                                                                                                                                  | immunoglobulin lambda chain, variable 1                                                                                                                                                                                                                                                                                                                                      | 7.19 |
| 1453084_s_at | <i>Col22a1</i>                                                                                                                                 | collagen, type XXII, alpha 1                                                                                                                                                                                                                                                                                                                                                 | 7.18 |
| 1416107_at   | <i>Nsg2</i>                                                                                                                                    | neuron specific gene family member 2                                                                                                                                                                                                                                                                                                                                         | 7.18 |
| 1423630_at   | <i>Cygb</i>                                                                                                                                    | cytoglobin                                                                                                                                                                                                                                                                                                                                                                   | 7.15 |
| 1449451_at   | <i>Serpina11</i>                                                                                                                               | serine (or cysteine) peptidase inhibitor, clade B (ovalbumin), member 11                                                                                                                                                                                                                                                                                                     | 7.03 |
| 1418157_at   | <i>Nr2f1</i>                                                                                                                                   | nuclear receptor subfamily 2, group F, member 1                                                                                                                                                                                                                                                                                                                              | 7.02 |
| 1453826_at   | <i>1810008K04Rik</i>                                                                                                                           | RIKEN cDNA 1810008K04 gene                                                                                                                                                                                                                                                                                                                                                   | 7.00 |
| 1450281_a_at | <i>1700021K02Rik</i>                                                                                                                           | RIKEN cDNA 1700021K02 gene                                                                                                                                                                                                                                                                                                                                                   | 6.99 |
| 1417312_at   | <i>Dkk3</i>                                                                                                                                    | dickkopf homolog 3 ( <i>Xenopus laevis</i> )                                                                                                                                                                                                                                                                                                                                 | 6.98 |
| 1427005_at   | <i>Plk2</i>                                                                                                                                    | polo-like kinase 2 (Drosophila)                                                                                                                                                                                                                                                                                                                                              | 6.86 |
| 1429209_at   | <i>Col23a1</i>                                                                                                                                 | procollagen, type XXIII, alpha 1                                                                                                                                                                                                                                                                                                                                             | 6.82 |
| 1416666_at   | <i>Serpine2</i>                                                                                                                                | serine (or cysteine) peptidase inhibitor, clade E, member 2                                                                                                                                                                                                                                                                                                                  | 6.78 |

|              |                                                                                                                     |                                                                                                                                                                                                                                                                                                                                                                              |      |
|--------------|---------------------------------------------------------------------------------------------------------------------|------------------------------------------------------------------------------------------------------------------------------------------------------------------------------------------------------------------------------------------------------------------------------------------------------------------------------------------------------------------------------|------|
| 1421946_at   | <i>Crp</i>                                                                                                          | C-reactive protein, pentraxin-related                                                                                                                                                                                                                                                                                                                                        | 6.78 |
| 1425594_at   | <i>Lamc3</i>                                                                                                        | laminin gamma 3                                                                                                                                                                                                                                                                                                                                                              | 6.75 |
| 1460255_at   | <i>Tnfsf13b</i>                                                                                                     | tumor necrosis factor (ligand) superfamily, member 13b                                                                                                                                                                                                                                                                                                                       | 6.70 |
| 1460256_at   | <i>Car3</i>                                                                                                         | carbonic anhydrase 3                                                                                                                                                                                                                                                                                                                                                         | 6.67 |
| 1415994_at   | <i>Cyp2e1</i>                                                                                                       | cytochrome P450, family 2, subfamily e, polypeptide 1                                                                                                                                                                                                                                                                                                                        | 6.58 |
| 1424086_at   | <i>D9Ucla1</i>                                                                                                      | DNA segment, Chr 9, University of California at Los Angeles 1                                                                                                                                                                                                                                                                                                                | 6.57 |
| 1435387_at   | <i>Slc2a13</i>                                                                                                      | solute carrier family 2 (facilitated glucose transporter), member 13                                                                                                                                                                                                                                                                                                         | 6.55 |
| 1421653_a_at | <i>Igh-VJ558</i> /// LOC238447<br>/// LOC544903 ///<br>LOC544907 ///<br>LOC633774 ///<br>LOC676478 ///<br>LOC677563 | immunoglobulin heavy chain (J558 family) /// similar to immunoglobulin heavy chain variable region /// similar to immunoglobulin mu-chain /// similar to anti-poly(dC) monoclonal antibody heavy chain /// similar to Ig heavy chain V region 23 precursor /// similar to Ig heavy chain V region 102 precursor /// similar to Ig heavy chain V region VH558 A1/A4 precursor | 6.54 |
| 1426016_a_at | <i>Tro</i>                                                                                                          | trophinin                                                                                                                                                                                                                                                                                                                                                                    | 6.53 |
| 1427256_at   | <i>Cspg2</i>                                                                                                        | chondroitin sulfate proteoglycan 2                                                                                                                                                                                                                                                                                                                                           | 6.52 |
| 1421991_a_at | <i>Igfbp4</i>                                                                                                       | insulin-like growth factor binding protein 4                                                                                                                                                                                                                                                                                                                                 | 6.50 |
| 1431226_a_at | <i>Fndc4</i>                                                                                                        | fibronectin type III domain containing 4                                                                                                                                                                                                                                                                                                                                     | 6.49 |
| 1439794_at   | ---                                                                                                                 | ---                                                                                                                                                                                                                                                                                                                                                                          | 6.48 |
| 1419080_at   | <i>Gdnf</i>                                                                                                         | glial cell line derived neurotrophic factor                                                                                                                                                                                                                                                                                                                                  | 6.42 |
| 1448788_at   | <i>Cd200</i>                                                                                                        | Cd200 antigen                                                                                                                                                                                                                                                                                                                                                                | 6.42 |
| 1455038_at   | <i>LOC632764</i>                                                                                                    | similar to melanoma antigen                                                                                                                                                                                                                                                                                                                                                  | 6.42 |
| 1453924_a_at | <i>Ptgfr</i>                                                                                                        | prostaglandin F receptor                                                                                                                                                                                                                                                                                                                                                     | 6.39 |
| 1448669_at   | <i>Dkk3</i>                                                                                                         | dickkopf homolog 3 ( <i>Xenopus laevis</i> )                                                                                                                                                                                                                                                                                                                                 | 6.36 |
| 1447311_at   | <i>Slc6a2</i>                                                                                                       | solute carrier family 6 (neurotransmitter transporter, noradrenalin), member 2                                                                                                                                                                                                                                                                                               | 6.33 |
| 1420349_at   | <i>Ptgfr</i>                                                                                                        | prostaglandin F receptor                                                                                                                                                                                                                                                                                                                                                     | 6.33 |
| 1435720_at   | <i>Kcnd3</i>                                                                                                        | potassium voltage-gated channel, Shal-related family, member 3                                                                                                                                                                                                                                                                                                               | 6.31 |
| 1425763_x_at | <i>Igh-VJ558</i> /// LOC238447<br>/// LOC544903 ///<br>LOC544907 ///<br>LOC633774 ///<br>LOC676478 ///<br>LOC677563 | immunoglobulin heavy chain (J558 family) /// similar to immunoglobulin heavy chain variable region /// similar to immunoglobulin mu-chain /// similar to anti-poly(dC) monoclonal antibody heavy chain /// similar to Ig heavy chain V region 23 precursor /// similar to Ig heavy chain V region 102 precursor /// similar to Ig heavy chain V region VH558 A1/A4 precursor | 6.29 |
| 1416200_at   | <i>9230117N10Rik</i>                                                                                                | RIKEN cDNA 9230117N10 gene                                                                                                                                                                                                                                                                                                                                                   | 6.28 |
| 1439663_at   | <i>Ptch1</i>                                                                                                        | Patched homolog 1                                                                                                                                                                                                                                                                                                                                                            | 6.27 |
| 1434073_at   | <i>Gprasp2</i>                                                                                                      | G protein-coupled receptor associated sorting protein 2                                                                                                                                                                                                                                                                                                                      | 6.21 |
| 1421201_a_at | <i>Tro</i>                                                                                                          | trophinin                                                                                                                                                                                                                                                                                                                                                                    | 6.19 |
| 1423062_at   | <i>Igfbp3</i>                                                                                                       | insulin-like growth factor binding protein 3                                                                                                                                                                                                                                                                                                                                 | 6.18 |
| 1435162_at   | <i>Prkg2</i>                                                                                                        | protein kinase, cGMP-dependent, type II                                                                                                                                                                                                                                                                                                                                      | 6.16 |
| 1448529_at   | <i>Thbd</i>                                                                                                         | thrombomodulin                                                                                                                                                                                                                                                                                                                                                               | 6.14 |

|              |                                        |                                                                                                                                                |      |
|--------------|----------------------------------------|------------------------------------------------------------------------------------------------------------------------------------------------|------|
| 1432032_a_at | <i>Artn</i>                            | artemin                                                                                                                                        | 6.10 |
| 1417169_at   | <i>Usp2</i>                            | ubiquitin specific peptidase 2                                                                                                                 | 6.09 |
| 1449475_at   | <i>Atp12a</i>                          | ATPase, H+/K+ transporting, nongastric, alpha polypeptide                                                                                      | 6.09 |
| 1418604_at   | <i>Avpr1a</i>                          | arginine vasopressin receptor 1A                                                                                                               | 6.06 |
| 1456424_s_at | <i>Pltp</i>                            | phospholipid transfer protein                                                                                                                  | 6.01 |
| 1419088_at   | <i>Timp3</i>                           | tissue inhibitor of metalloproteinase 3                                                                                                        | 6.00 |
| 1417574_at   | <i>Cxcl12</i>                          | chemokine (C-X-C motif) ligand 12                                                                                                              | 6.00 |
| 1443036_at   | <i>C630007C17Rik</i>                   | RIKEN cDNA C630007C17 gene                                                                                                                     | 5.99 |
| 1418158_at   | <i>Trp63</i>                           | transformation related protein 63                                                                                                              | 5.95 |
| 1418050_at   | <i>Gpld1</i>                           | glycosylphosphatidylinositol specific phospholipase D1                                                                                         | 5.90 |
| 1426285_at   | <i>Lama2</i>                           | laminin, alpha 2                                                                                                                               | 5.86 |
| 1416077_at   | <i>Adm</i>                             | adrenomedullin                                                                                                                                 | 5.80 |
| 1433939_at   | <i>A730046J16</i>                      | hypothetical protein A730046J16                                                                                                                | 5.79 |
| 1435950_at   | <i>Hr</i>                              | hairless                                                                                                                                       | 5.77 |
| 1458268_s_at | <i>Igfbp3</i>                          | insulin-like growth factor binding protein 3                                                                                                   | 5.77 |
| 1439747_at   | <i>Ptges</i>                           | prostaglandin E synthase                                                                                                                       | 5.77 |
| 1419070_at   | <i>Cys1</i>                            | cystin 1                                                                                                                                       | 5.75 |
| 1438483_at   | <i>Nos1</i>                            | nitric oxide synthase 1, neuronal                                                                                                              | 5.73 |
| 1427455_x_at | <i>Igk-C /// Igk-V28 /// Igk-V8-16</i> | immunoglobulin kappa chain, constant region /// immunoglobulin kappa chain variable 28 (V28) /// immunoglobulin kappa chain variable 8 (V8)-16 | 5.72 |
| 1449388_at   | <i>Thbs4</i>                           | thrombospondin 4                                                                                                                               | 5.70 |
| 1418209_a_at | <i>Pfn2</i>                            | profilin 2                                                                                                                                     | 5.69 |
| 1440911_at   | <i>Col23a1</i>                         | procollagen, type XXIII, alpha 1                                                                                                               | 5.64 |
| 1450584_at   | <i>Hoxd11</i>                          | homeo box D11                                                                                                                                  | 5.64 |
| 1452463_x_at | ---                                    | Immunoglobulin kappa chain complex                                                                                                             | 5.60 |
| 1449425_at   | <i>Wnt2</i>                            | wingless-related MMTV integration site 2                                                                                                       | 5.59 |
| 1418697_at   | <i>Inmt</i>                            | indolethylamine N-methyltransferase                                                                                                            | 5.57 |
| 1448501_at   | <i>Tspan6</i>                          | tetraspanin 6                                                                                                                                  | 5.55 |
| 1429030_at   | <i>C1qtnf7</i>                         | C1q and tumor necrosis factor related protein 7                                                                                                | 5.50 |
| 1457323_at   | <i>LOC632191</i>                       | hypothetical protein LOC632191                                                                                                                 | 5.50 |
| 1460197_a_at | <i>Steap4</i>                          | STEAP family member 4                                                                                                                          | 5.49 |
| 1451679_at   | <i>6530401D17Rik</i>                   | RIKEN cDNA 6530401D17 gene                                                                                                                     | 5.48 |
| 1418210_at   | <i>Pfn2</i>                            | profilin 2                                                                                                                                     | 5.47 |
| 1441172_at   | <i>Aff3</i>                            | AF4/FMR2 family, member 3                                                                                                                      | 5.47 |
| 1425895_a_at | <i>Id1</i>                             | inhibitor of DNA binding 1                                                                                                                     | 5.42 |
| 1428333_at   | <i>2900062L11Rik</i>                   | RIKEN cDNA 2900062L11 gene                                                                                                                     | 5.30 |
| 1433716_x_at | <i>Gfra2</i>                           | glial cell line derived neurotrophic factor family receptor alpha 2                                                                            | 5.30 |
| 1447839_x_at | <i>Adm</i>                             | adrenomedullin                                                                                                                                 | 5.30 |
| 1455925_at   | <i>Prdm8</i>                           | PR domain containing 8                                                                                                                         | 5.27 |
| 1447272_s_at | <i>Atp10a</i>                          | ATPase, class V, type 10A                                                                                                                      | 5.26 |
| 1436993_x_at | <i>Pfn2</i>                            | profilin 2                                                                                                                                     | 5.26 |
| 1448229_s_at | <i>Ccnd2</i>                           | cyclin D2                                                                                                                                      | 5.24 |
| 1418454_at   | <i>Mfap5</i>                           | microfibrillar associated protein 5                                                                                                            | 5.18 |
| 1418126_at   | <i>Ccl5</i>                            | chemokine (C-C motif) ligand 5                                                                                                                 | 5.14 |
| 1430554_at   | <i>Lrig3</i>                           | leucine-rich repeats and immunoglobulin-like domains 3                                                                                         | 5.13 |

|              |                      |                                                                                                                                 |      |
|--------------|----------------------|---------------------------------------------------------------------------------------------------------------------------------|------|
| 1457021_x_at | <i>Amhr2</i>         | anti-Mullerian hormone type 2 receptor                                                                                          | 5.12 |
| 1450512_at   | <i>Ntn4</i>          | netrin 4                                                                                                                        | 5.11 |
| 1415935_at   | <i>Smoc2</i>         | SPARC related modular calcium binding 2                                                                                         | 5.06 |
| 1419100_at   | <i>Serpina3n</i>     | serine (or cysteine) peptidase inhibitor, clade A, member 3N                                                                    | 5.05 |
| 1435337_at   | <i>Tshz3</i>         | teashirt zinc finger family member 3                                                                                            | 5.05 |
| 1438667_at   | <i>5730410E15Rik</i> | RIKEN cDNA 5730410E15 gene                                                                                                      | 5.04 |
| 1427168_a_at | <i>Col14a1</i>       | procollagen, type XIV, alpha 1                                                                                                  | 5.03 |
| 1424305_at   | <i>Igj</i>           | immunoglobulin joining chain                                                                                                    | 5.00 |
| 1428136_at   | <i>Sfrp1</i>         | secreted frizzled-related sequence protein 1                                                                                    | 5.00 |
| 1422473_at   | <i>Pde4b</i>         | phosphodiesterase 4B, cAMP specific                                                                                             | 4.96 |
| 1419200_at   | <i>Fxyd7</i>         | FXD domain-containing ion transport regulator 7                                                                                 | 4.92 |
| 1460163_at   | <i>C1qtnf7</i>       | C1q and tumor necrosis factor related protein 7                                                                                 | 4.92 |
| 1427527_a_at | <i>Pthlh</i>         | parathyroid hormone-like peptide                                                                                                | 4.91 |
| 1419089_at   | <i>Timp3</i>         | tissue inhibitor of metalloproteinase 3                                                                                         | 4.88 |
| 1455145_at   | ---                  | 14, 17 days embryo head cDNA, RIKEN full-length enriched library, clone:3222402J19 product:unclassifiable, full insert sequence | 4.83 |
| 1422632_at   | <i>Ctsw</i>          | cathepsin W                                                                                                                     | 4.81 |
| 1416630_at   | <i>Id3</i>           | inhibitor of DNA binding 3                                                                                                      | 4.79 |
| 1439549_at   | <i>Prrg3</i>         | proline rich Gla (G-carboxyglutamic acid) 3 (transmembrane)                                                                     | 4.76 |
| 1429679_at   | <i>Lrrc17</i>        | leucine rich repeat containing 17                                                                                               | 4.73 |
| 1430555_s_at | <i>Lrig3</i>         | leucine-rich repeats and immunoglobulin-like domains 3                                                                          | 4.73 |
| 1420414_at   | <i>Hoxa11</i>        | homeo box A11                                                                                                                   | 4.72 |
| 1459847_x_at | <i>Gfra2</i>         | glial cell line derived neurotrophic factor family receptor alpha 2                                                             | 4.70 |
| 1449334_at   | <i>Timp3</i>         | tissue inhibitor of metalloproteinase 3                                                                                         | 4.70 |
| 1424942_a_at | <i>Myc</i>           | myelocytomatosis oncogene                                                                                                       | 4.70 |
| 1440777_x_at | ---                  | ---                                                                                                                             | 4.66 |
| 1452249_at   | <i>Prickle1</i>      | prickle like 1 (Drosophila)                                                                                                     | 4.66 |
| 1457040_at   | <i>Lgi2</i>          | leucine-rich repeat LGI family, member 2                                                                                        | 4.64 |
| 1417023_a_at | <i>Fabp4</i>         | fatty acid binding protein 4, adipocyte                                                                                         | 4.64 |
| 1436713_s_at | <i>Gtl2</i>          | GTL2, imprinted maternally expressed untranslated mRNA                                                                          | 4.64 |
| 1426937_at   | <i>6330406115Rik</i> | RIKEN cDNA 6330406115 gene                                                                                                      | 4.63 |
| 1447725_at   | <i>C030034E14Rik</i> | RIKEN cDNA C030034E14 gene                                                                                                      | 4.63 |
| 1429022_at   | <i>Adcyap1r1</i>     | adenylate cyclase activating polypeptide 1 receptor 1                                                                           | 4.61 |
| 1425444_a_at | <i>Tgfb2</i>         | transforming growth factor, beta receptor II                                                                                    | 4.60 |
| 1429178_at   | <i>Odz3</i>          | odd Oz/ten-m homolog 3 (Drosophila)                                                                                             | 4.60 |
| 1452840_at   | <i>1500009L16Rik</i> | RIKEN cDNA 1500009L16 gene                                                                                                      | 4.58 |
| 1421992_a_at | <i>Igfbp4</i>        | insulin-like growth factor binding protein 4                                                                                    | 4.56 |
| 1448424_at   | <i>Frzb</i>          | frizzled-related protein                                                                                                        | 4.53 |
| 1418599_at   | <i>Col11a1</i>       | procollagen, type XI, alpha 1                                                                                                   | 4.52 |
| 1451758_at   | <i>Lamc3</i>         | laminin gamma 3                                                                                                                 | 4.52 |
| 1442277_at   | <i>Chka</i>          | choline kinase alpha                                                                                                            | 4.51 |

|              |                                                      |                                                                                                                                                |      |
|--------------|------------------------------------------------------|------------------------------------------------------------------------------------------------------------------------------------------------|------|
| 1423467_at   | <i>Ms4a4b</i>                                        | membrane-spanning 4-domains, subfamily A, member 4B                                                                                            | 4.51 |
| 1431115_at   | <i>Tgif2</i>                                         | TGFB-induced factor 2                                                                                                                          | 4.49 |
| 1421970_a_at | <i>Gria2</i>                                         | glutamate receptor, ionotropic, AMPA2 (alpha 2)                                                                                                | 4.49 |
| 1428455_at   | <i>Col14a1</i>                                       | procollagen, type XIV, alpha 1                                                                                                                 | 4.48 |
| 1423585_at   | <i>Igfbp7</i> /// LOC621527                          | insulin-like growth factor binding protein 7 /// similar to O-acyltransferase (membrane bound) domain containing 2                             | 4.47 |
| 1460513_a_at | <i>Ednra</i>                                         | endothelin receptor type A                                                                                                                     | 4.45 |
| 1428064_at   | <i>Centd2</i>                                        | centaurin, delta 2                                                                                                                             | 4.44 |
| 1422474_at   | <i>Pde4b</i>                                         | phosphodiesterase 4B, cAMP specific                                                                                                            | 4.44 |
| 1427257_at   | <i>Cspg2</i>                                         | chondroitin sulfate proteoglycan 2                                                                                                             | 4.43 |
| 1451263_a_at | <i>Fabp4</i>                                         | fatty acid binding protein 4, adipocyte                                                                                                        | 4.42 |
| 1434939_at   | <i>Foxf1a</i>                                        | forkhead box F1a                                                                                                                               | 4.41 |
| 1428667_at   | <i>Maoa</i>                                          | monoamine oxidase A                                                                                                                            | 4.40 |
| 1417429_at   | <i>Fmo1</i>                                          | flavin containing monooxygenase 1                                                                                                              | 4.39 |
| 1444089_at   | <i>Spnb2</i>                                         | spectrin beta 2                                                                                                                                | 4.38 |
| 1416872_at   | <i>Tspan6</i>                                        | tetraspanin 6                                                                                                                                  | 4.37 |
| 1448919_at   | <i>Cd302</i>                                         | CD302 antigen                                                                                                                                  | 4.36 |
| 1452244_at   | <i>6330406115Rik</i>                                 | RIKEN cDNA 6330406115 gene                                                                                                                     | 4.35 |
| 1458943_at   | ---                                                  | ---                                                                                                                                            | 4.34 |
| 1449828_at   | <i>Ptgfr</i>                                         | prostaglandin F receptor                                                                                                                       | 4.33 |
| 1450852_s_at | <i>F2r</i>                                           | coagulation factor II (thrombin) receptor                                                                                                      | 4.32 |
| 1425829_a_at | <i>Steap4</i>                                        | STEAP family member 4                                                                                                                          | 4.32 |
| 1417411_at   | <i>Nap115</i>                                        | nucleosome assembly protein 1-like 5                                                                                                           | 4.30 |
| 1426431_at   | <i>Jag2</i>                                          | jagged 2                                                                                                                                       | 4.30 |
| 1433728_at   | <i>BC038479</i>                                      | cDNA sequence BC038479                                                                                                                         | 4.28 |
| 1420421_s_at | <i>Klr1b</i>                                         | killer cell lectin-like receptor subfamily B member 1B                                                                                         | 4.28 |
| 1434400_at   | <i>Tgif2</i>                                         | TGFB-induced factor 2                                                                                                                          | 4.25 |
| 1419606_a_at | <i>Tnnt1</i>                                         | troponin T1, skeletal, slow                                                                                                                    | 4.22 |
| 1438967_x_at | <i>Amhr2</i>                                         | anti-Mullerian hormone type 2 receptor                                                                                                         | 4.21 |
| 1422324_a_at | <i>Pthlh</i>                                         | parathyroid hormone-like peptide                                                                                                               | 4.19 |
| 1427660_x_at | <i>Igk-C</i> /// <i>Igk-V28</i> /// <i>Igk-V8-16</i> | immunoglobulin kappa chain, constant region /// immunoglobulin kappa chain variable 28 (V28) /// immunoglobulin kappa chain variable 8 (V8)-16 | 4.16 |
| 1418220_at   | <i>Foxf2</i>                                         | forkhead box F2                                                                                                                                | 4.13 |
| 1452899_at   | <i>Rian</i>                                          | RNA imprinted and accumulated in nucleus                                                                                                       | 4.13 |
| 1449315_at   | <i>Odz3</i>                                          | odd Oz/ten-m homolog 3 (Drosophila)                                                                                                            | 4.12 |
| 1437401_at   | ---                                                  | ---                                                                                                                                            | 4.11 |
| 1422875_at   | <i>Cd84</i>                                          | CD84 antigen                                                                                                                                   | 4.10 |
| 1436878_at   | <i>Baalc</i>                                         | brain and acute leukemia, cytoplasmic                                                                                                          | 4.09 |
| 1417455_at   | <i>Tgfb3</i>                                         | transforming growth factor, beta 3                                                                                                             | 4.09 |
| 1416658_at   | <i>Frzb</i>                                          | frizzled-related protein                                                                                                                       | 4.08 |
| 1451866_a_at | <i>Hgf</i>                                           | hepatocyte growth factor                                                                                                                       | 4.07 |
| 1450773_at   | <i>Kcnd2</i>                                         | potassium voltage-gated channel, Shal-related family, member 2                                                                                 | 4.07 |
| 1439044_at   | <i>Zfp354c</i>                                       | zinc finger protein 354C                                                                                                                       | 4.06 |



|              |                                                          |                                                                                                                                                                               |      |
|--------------|----------------------------------------------------------|-------------------------------------------------------------------------------------------------------------------------------------------------------------------------------|------|
| 1452339_at   | <i>Adamts7</i>                                           | a disintegrin-like and metallopeptidase (reprolysin type) with thrombospondin type 1 motif, 7                                                                                 | 4.01 |
| 1418753_at   | <i>Gfpt2</i>                                             | glutamine fructose-6-phosphate transaminase 2                                                                                                                                 | 4.01 |
| 1418219_at   | <i>Il15</i>                                              | interleukin 15                                                                                                                                                                | 4.00 |
| 1419519_at   | <i>Igf1</i>                                              | insulin-like growth factor 1                                                                                                                                                  | 4.00 |
| 1416773_at   | <i>Wee1</i>                                              | wee 1 homolog (S. pombe)                                                                                                                                                      | 3.99 |
| 1435460_at   | <i>Prkg2</i>                                             | protein kinase, cGMP-dependent, type II                                                                                                                                       | 3.99 |
| 1446625_at   | <i>Tmem100</i>                                           | transmembrane protein 100                                                                                                                                                     | 3.97 |
| 1452400_a_at | <i>Hoxa11os</i>                                          | homeo box A11, opposite strand transcript                                                                                                                                     | 3.94 |
| 1442676_at   | <i>Maoa</i>                                              | monoamine oxidase A                                                                                                                                                           | 3.92 |
| 1433956_at   | <i>Cdh5</i>                                              | cadherin 5                                                                                                                                                                    | 3.90 |
| 1452417_x_at | <i>Igk-C /// Igk-V28 /// 2010205A11Rik /// Igk-V8-16</i> | immunoglobulin kappa chain, constant region /// immunoglobulin kappa chain variable 28 (V28) /// RIKEN cDNA 2010205A11 gene /// immunoglobulin kappa chain variable 8 (V8)-16 | 3.89 |
| 1434413_at   | ---                                                      | ---                                                                                                                                                                           | 3.86 |
| 1452815_at   | <i>P2ry10</i>                                            | purinergic receptor P2Y, G-protein coupled 10                                                                                                                                 | 3.85 |
| 1416006_at   | <i>Mdk</i>                                               | midkine                                                                                                                                                                       | 3.85 |
| 1451843_a_at | <i>Ggta1</i>                                             | glycoprotein galactosyltransferase alpha 1, 3                                                                                                                                 | 3.83 |
| 1443458_at   | <i>D630033O11Rik</i>                                     | RIKEN cDNA D630033O11 gene                                                                                                                                                    | 3.83 |
| 1419128_at   | <i>Itgax</i>                                             | integrin alpha X                                                                                                                                                              | 3.81 |
| 1425644_at   | <i>Lepr</i>                                              | leptin receptor                                                                                                                                                               | 3.79 |
| 1419302_at   | <i>Heyl</i>                                              | hairly/enhancer-of-split related with YRPW motif-like                                                                                                                         | 3.77 |
| 1417937_at   | <i>Dact1</i>                                             | dapper homolog 1, antagonist of beta-catenin (xenopus)                                                                                                                        | 3.76 |
| 1429809_at   | <i>Tmtc2</i>                                             | transmembrane and tetratricopeptide repeat containing 2                                                                                                                       | 3.76 |
| 1418181_at   | <i>Ptp4a3</i>                                            | protein tyrosine phosphatase 4a3                                                                                                                                              | 3.75 |
| 1438370_x_at | <i>Dos</i>                                               | downstream of Stk11                                                                                                                                                           | 3.74 |
| 1425896_a_at | <i>Fbn1</i>                                              | fibrillin 1                                                                                                                                                                   | 3.72 |
| 1425511_at   | <i>Mark1</i>                                             | MAP/microtubule affinity-regulating kinase 1                                                                                                                                  | 3.72 |
| 1449082_at   | <i>Mfap5</i>                                             | microfibrillar associated protein 5                                                                                                                                           | 3.70 |
| 1424306_at   | <i>Elovl4</i>                                            | elongation of very long chain fatty acids (FEN1/Elo2, SUR4/Elo3, yeast)-like 4                                                                                                | 3.68 |
| 1423085_at   | <i>Efnb3</i>                                             | ephrin B3                                                                                                                                                                     | 3.66 |
| 1419358_at   | <i>Sorcs2</i>                                            | sortilin-related VPS10 domain containing receptor 2                                                                                                                           | 3.65 |
| 1452014_a_at | <i>Igf1</i>                                              | insulin-like growth factor 1                                                                                                                                                  | 3.65 |
| 1434316_at   | <i>Chsy1</i>                                             | carbohydrate (chondroitin) synthase 1                                                                                                                                         | 3.64 |
| 1437319_at   | <i>Unc13c</i>                                            | unc-13 homolog C (C. elegans)                                                                                                                                                 | 3.64 |
| 1434470_at   | <i>Syt13</i>                                             | synaptotagmin XIII                                                                                                                                                            | 3.62 |
| 1421694_a_at | <i>Cspg2</i>                                             | chondroitin sulfate proteoglycan 2                                                                                                                                            | 3.62 |
| 1434410_at   | <i>BC043118</i>                                          | cDNA sequence BC043118                                                                                                                                                        | 3.61 |
| 1422733_at   | <i>Fjx1</i>                                              | four jointed box 1 (Drosophila)                                                                                                                                               | 3.60 |

|              |                              |                                                                                |      |
|--------------|------------------------------|--------------------------------------------------------------------------------|------|
| 1425510_at   | <i>Mark1</i>                 | MAP/microtubule affinity-regulating kinase 1                                   | 3.60 |
| 1451691_at   | <i>Ednra</i>                 | endothelin receptor type A                                                     | 3.59 |
| 1450114_at   | <i>Ksr1</i>                  | kinase suppressor of ras 1                                                     | 3.59 |
| 1437950_at   | <i>BC035537</i>              | cDNA sequence BC035537                                                         | 3.58 |
| 1427086_at   | <i>Slit3</i>                 | slit homolog 3 (Drosophila)                                                    | 3.57 |
| 1416302_at   | <i>Ebf1</i>                  | early B-cell factor 1                                                          | 3.56 |
| 1448925_at   | <i>Twist2</i>                | twist homolog 2 (Drosophila)                                                   | 3.56 |
| 1455622_at   | <i>Podxl2</i>                | podocalyxin-like 2                                                             | 3.56 |
| 1441663_at   | <i>Prickle1</i>              | Prickle like 1 (Drosophila)                                                    | 3.54 |
| 1448818_at   | <i>Wnt5a</i>                 | wingless-related MMTV integration site 5A                                      | 3.53 |
| 1437308_s_at | <i>F2r</i>                   | coagulation factor II (thrombin) receptor                                      | 3.51 |
| 1433776_at   | <i>Lhfp</i>                  | lipoma HMGIC fusion partner                                                    | 3.50 |
| 1452013_at   | <i>Atp10a</i>                | ATPase, class V, type 10A                                                      | 3.50 |
| 1418547_at   | <i>Tfpi2</i>                 | tissue factor pathway inhibitor 2                                              | 3.50 |
| 1420406_at   | <i>Peg12</i>                 | paternally expressed 12                                                        | 3.50 |
| 1451577_at   | <i>Zbtb20</i>                | zinc finger and BTB domain containing 20                                       | 3.50 |
| 1452905_at   | <i>Gtl2</i> /// <i>Lphn1</i> | GTL2, imprinted maternally expressed untranslated mRNA /// latrophilin 1       | 3.50 |
| 1448700_at   | <i>G0s2</i>                  | G0/G1 switch gene 2                                                            | 3.50 |
| 1450728_at   | <i>Fjx1</i>                  | four jointed box 1 (Drosophila)                                                | 3.49 |
| 1424455_at   | <i>Gprasp1</i>               | G protein-coupled receptor associated sorting protein 1                        | 3.48 |
| 1451308_at   | <i>Elovl4</i>                | elongation of very long chain fatty acids (FEN1/Elo2, SUR4/Elo3, yeast)-like 4 | 3.48 |
| 1419309_at   | <i>Pdpm</i>                  | podoplanin                                                                     | 3.46 |
| 1440147_at   | <i>Lgi2</i>                  | leucine-rich repeat LGI family, member 2                                       | 3.45 |
| 1456835_at   | <i>LOC624549</i>             | Hypothetical protein LOC624549                                                 | 3.45 |
| 1449335_at   | <i>Timp3</i>                 | tissue inhibitor of metalloproteinase 3                                        | 3.44 |
| 1449328_at   | <i>Ly75</i>                  | lymphocyte antigen 75                                                          | 3.44 |
| 1452296_at   | <i>Slit3</i>                 | slit homolog 3 (Drosophila)                                                    | 3.43 |
| 1433727_at   | <i>BC038479</i>              | cDNA sequence BC038479                                                         | 3.43 |
| 1453593_at   | <i>1700110N18Rik</i>         | RIKEN cDNA 1700110N18 gene                                                     | 3.42 |
| 1449630_s_at | <i>Mark1</i>                 | MAP/microtubule affinity-regulating kinase 1                                   | 3.42 |
| 1431099_at   | <i>Hoxd8</i>                 | homeo box D8                                                                   | 3.42 |
| 1452183_a_at | <i>Gtl2</i>                  | GTL2, imprinted maternally expressed untranslated mRNA                         | 3.41 |
| 1434709_at   | <i>C130076O07Rik</i>         | RIKEN cDNA C130076O07 gene                                                     | 3.40 |
| 1433638_s_at | <i>Hoxd8</i>                 | homeo box D8                                                                   | 3.39 |
| 1449350_at   | <i>Osr1</i>                  | odd-skipped related 1 (Drosophila)                                             | 3.39 |
| 1433907_at   | <i>Pknox2</i>                | Pbx/knotted 1 homeobox 2                                                       | 3.38 |
| 1441137_at   | <i>Bicc1</i>                 | bicaudal C homolog 1 (Drosophila)                                              | 3.37 |
| 1449110_at   | <i>Rhob</i>                  | ras homolog gene family, member B                                              | 3.36 |
| 1438801_at   | <i>Dnm3</i>                  | dynamamin 3                                                                    | 3.35 |
| 1460371_at   | <i>Hspa12b</i>               | heat shock protein 12B                                                         | 3.34 |
| 1458659_at   | <i>Plac9</i>                 | placenta specific 9                                                            | 3.34 |
| 1456156_at   | <i>Lepr</i>                  | leptin receptor                                                                | 3.33 |
| 1417426_at   | <i>Prg1</i>                  | proteoglycan 1, secretory granule                                              | 3.30 |
| 1417331_a_at | <i>Arl6</i>                  | ADP-ribosylation factor-like 6                                                 | 3.30 |
| 1442265_at   | <i>Fancc</i>                 | Fanconi anemia, complementation group C                                        | 3.28 |
| 1449226_at   | <i>Hic1</i>                  | hypermethylated in cancer 1                                                    | 3.28 |

|              |                      |                                                                     |      |
|--------------|----------------------|---------------------------------------------------------------------|------|
| 1448901_at   | <i>Cpxm1</i>         | carboxypeptidase X 1 (M14 family)                                   | 3.26 |
| 1433855_at   | <i>Abat</i>          | 4-aminobutyrate aminotransferase                                    | 3.24 |
| 1425281_a_at | <i>Tsc22d3</i>       | TSC22 domain family 3                                               | 3.23 |
| 1448395_at   | <i>Sfrp1</i>         | secreted frizzled-related sequence protein 1                        | 3.23 |
| 1436029_at   | <i>Bicc1</i>         | bicaudal C homolog 1 (Drosophila)                                   | 3.23 |
| 1455299_at   | <i>1700110N18Rik</i> | RIKEN cDNA 1700110N18 gene                                          | 3.22 |
| 1435722_at   | <i>Gria4</i>         | glutamate receptor, ionotropic, AMPA4 (alpha 4)                     | 3.22 |
| 1433525_at   | <i>Ednra</i>         | endothelin receptor type A                                          | 3.21 |
| 1422084_at   | <i>Bmx</i>           | BMX non-receptor tyrosine kinase                                    | 3.19 |
| 1453317_a_at | <i>Khdrbs3</i>       | KH domain containing, RNA binding, signal transduction associated 3 | 3.19 |
| 1430463_a_at | <i>Sncaip</i>        | synuclein, alpha interacting protein (synphilin)                    | 3.19 |
| 1435275_at   | <i>Cox6b2</i>        | cytochrome c oxidase subunit VIb polypeptide 2                      | 3.18 |
| 1457102_at   | <i>A030001D16Rik</i> | RIKEN cDNA A030001D16 gene                                          | 3.18 |
| 1447915_x_at | <i>BC054438</i>      | cDNA sequence BC054438                                              | 3.18 |
| 1422243_at   | <i>Fgf7</i>          | fibroblast growth factor 7                                          | 3.18 |
| 1423756_s_at | <i>Igfbp4</i>        | insulin-like growth factor binding protein 4                        | 3.17 |
| 1423484_at   | <i>Bicc1</i>         | bicaudal C homolog 1 (Drosophila)                                   | 3.16 |
| 1452163_at   | <i>Ets1</i>          | E26 avian leukemia oncogene 1, 5' domain                            | 3.16 |
| 1431475_a_at | <i>Hoxa10</i>        | homeo box A10                                                       | 3.16 |
| 1437595_at   | <i>E030010A14Rik</i> | RIKEN cDNA E030010A14 gene                                          | 3.16 |
| 1418534_at   | ---                  | ---                                                                 | 3.16 |
| 1453419_at   | <i>2900078C09Rik</i> | RIKEN cDNA 2900078C09 gene                                          | 3.15 |
| 1457637_at   | <i>Prickle1</i>      | Prickle like 1 (Drosophila)                                         | 3.15 |
| 1436459_at   | <i>Gpr161</i>        | G protein-coupled receptor 161                                      | 3.15 |
| 1428696_at   | <i>2310015N21Rik</i> | RIKEN cDNA 2310015N21 gene                                          | 3.14 |
| 1450724_at   | <i>Drctnnb1a</i>     | down-regulated by Ctnnb1, a                                         | 3.14 |
| 1416590_a_at | <i>Rab34</i>         | RAB34, member of RAS oncogene family                                | 3.14 |
| 1432176_a_at | ---                  | ---                                                                 | 3.14 |
| 1452483_a_at | <i>Cd44</i>          | CD44 antigen                                                        | 3.13 |
| 1424596_s_at | <i>Lmcd1</i>         | LIM and cysteine-rich domains 1                                     | 3.13 |
| 1416591_at   | <i>Rab34</i>         | RAB34, member of RAS oncogene family                                | 3.13 |
| 1416598_at   | <i>Glis2</i>         | GLIS family zinc finger 2                                           | 3.13 |
| 1419126_at   | <i>Hoxd9</i>         | homeo box D9                                                        | 3.12 |
| 1425861_x_at | <i>Cacna2d1</i>      | calcium channel, voltage-dependent, alpha2/delta subunit 1          | 3.12 |
| 1433894_at   | <i>AI591476</i>      | expressed sequence AI591476                                         | 3.11 |
| 1417319_at   | <i>Pvr13</i>         | poliovirus receptor-related 3                                       | 3.11 |
| 1418058_at   | <i>Elt1</i>          | EGF, latrophilin seven transmembrane domain containing 1            | 3.11 |
| 1423946_at   | <i>Pdlim2</i>        | PDZ and LIM domain 2                                                | 3.10 |
| 1452968_at   | <i>Cthrc1</i>        | collagen triple helix repeat containing 1                           | 3.10 |
| 1447851_x_at | ---                  | ---                                                                 | 3.09 |
| 1455711_at   | <i>Dtx4</i>          | deltex 4 homolog (Drosophila)                                       | 3.08 |
| 1417446_at   | <i>Slc12a4</i>       | solute carrier family 12, member 4                                  | 3.08 |
| 1418059_at   | <i>Elt1</i>          | EGF, latrophilin seven transmembrane domain containing 1            | 3.07 |
| 1448729_a_at | 4-Sep                | septin 4                                                            | 3.07 |

|              |                      |                                                                           |      |
|--------------|----------------------|---------------------------------------------------------------------------|------|
| 1454637_at   | <i>Klhl8</i>         | kelch-like 8 (Drosophila)                                                 | 3.05 |
| 1428211_at   | <i>4933406E20Rik</i> | RIKEN cDNA 4933406E20 gene                                                | 3.05 |
| 1418538_at   | <i>Kdelr3</i>        | KDEL (Lys-Asp-Glu-Leu) endoplasmic reticulum protein retention receptor 3 | 3.05 |
| 1429965_at   | <i>Lonrf2</i>        | LON peptidase N-terminal domain and ring finger 2                         | 3.04 |
| 1423292_a_at | <i>Prx</i>           | periaxin                                                                  | 3.04 |
| 1438266_at   | <i>Adamts15</i>      | ADAMTS-like 5                                                             | 3.04 |
| 1436999_at   | <i>5033414K04Rik</i> | RIKEN cDNA 5033414K04 gene                                                | 3.04 |
| 1426319_at   | <i>Pdgfd</i>         | platelet-derived growth factor, D polypeptide                             | 3.04 |
| 1437066_at   | <i>Zbtb20</i>        | zinc finger and BTB domain containing 20                                  | 3.03 |
| 1434621_at   | <i>BC054438</i>      | cDNA sequence BC054438                                                    | 3.03 |
| 1428209_at   | <i>Bex4</i>          | brain expressed gene 4                                                    | 3.02 |
| 1454877_at   | <i>Sertad4</i>       | SERTA domain containing 4                                                 | 3.02 |
| 1437417_s_at | <i>Gpc6</i>          | glypican 6                                                                | 3.01 |
| 1434593_at   | <i>Eif5a2</i>        | eukaryotic translation initiation factor 5A2                              | 3.01 |
| 1418532_at   | <i>Fzd2</i>          | frizzled homolog 2 (Drosophila)                                           | 3.00 |
| 1428026_at   | <i>Tshz2</i>         | teashirt zinc finger family member 2                                      | 2.99 |
| 1422602_a_at | <i>Wnt5b</i>         | wingless-related MMTV integration site 5B                                 | 2.99 |
| 1448416_at   | <i>Mgp</i>           | matrix Gla protein                                                        | 2.97 |
| 1459713_s_at | <i>Tmem16a</i>       | transmembrane protein 16A                                                 | 2.97 |
| 1460009_at   | ---                  | Transcribed locus                                                         | 2.97 |
| 1417985_at   | <i>Nrarp</i>         | Notch-regulated ankyrin repeat protein                                    | 2.97 |
| 1448592_at   | <i>Crtap</i>         | cartilage associated protein                                              | 2.96 |
| 1437065_at   | <i>Zbtb20</i>        | zinc finger and BTB domain containing 20                                  | 2.96 |
| 1420364_at   | <i>Gpr87</i>         | G protein-coupled receptor 87                                             | 2.94 |
| 1436475_at   | ---                  | Transcribed locus                                                         | 2.93 |
| 1416160_at   | <i>Nr2f2</i>         | nuclear receptor subfamily 2, group F, member 2                           | 2.93 |
| 1449559_at   | <i>Msx2</i>          | homeo box, msh-like 2                                                     | 2.93 |
| 1424382_at   | <i>Rcn3</i>          | reticulocalbin 3, EF-hand calcium binding domain                          | 2.93 |
| 1430596_s_at | <i>1700110N18Rik</i> | RIKEN cDNA 1700110N18 gene                                                | 2.93 |
| 1448350_at   | <i>Asl</i>           | argininosuccinate lyase                                                   | 2.92 |
| 1436545_at   | <i>Dtx4</i>          | deltex 4 homolog (Drosophila)                                             | 2.92 |
| 1422671_s_at | <i>Naalad2</i>       | N-acetylated alpha-linked acidic dipeptidase 2                            | 2.92 |
| 1418533_s_at | <i>Fzd2</i>          | frizzled homolog 2 (Drosophila)                                           | 2.92 |
| 1424208_at   | <i>Ptger4</i>        | prostaglandin E receptor 4 (subtype EP4)                                  | 2.92 |
| 1419303_at   | <i>Heyl</i>          | hairly/enhancer-of-split related with YRPW motif-like                     | 2.91 |
| 1435975_at   | <i>A1115600</i>      | expressed sequence A1115600                                               | 2.91 |
| 1438329_at   | <i>Tlr12</i>         | toll-like receptor 12                                                     | 2.90 |
| 1426571_at   | <i>Tmem16a</i>       | transmembrane protein 16A                                                 | 2.89 |
| 1426725_s_at | <i>Ets1</i>          | E26 avian leukemia oncogene 1, 5' domain                                  | 2.88 |
| 1418606_at   | <i>Hoxd10</i>        | homeo box D10                                                             | 2.88 |
| 1418483_a_at | <i>Ggta1</i>         | glycoprotein galactosyltransferase alpha 1, 3                             | 2.87 |
| 1419470_at   | <i>Gnb4</i>          | guanine nucleotide binding protein, beta 4                                | 2.87 |
| 1455419_at   | <i>D630045J12Rik</i> | RIKEN cDNA D630045J12 gene                                                | 2.87 |
| 1422812_at   | <i>Cxcr6</i>         | chemokine (C-X-C motif) receptor 6                                        | 2.87 |

|              |                      |                                                                     |      |
|--------------|----------------------|---------------------------------------------------------------------|------|
| 1417304_at   | <i>Chrd</i>          | chordin                                                             | 2.87 |
| 1450080_at   | <i>Cxx1c</i>         | CAAX box 1 homolog C (human)                                        | 2.86 |
| 1423331_a_at | <i>Pvrl3</i>         | poliovirus receptor-related 3                                       | 2.85 |
| 1447623_s_at | <i>C130009A20Rik</i> | RIKEN cDNA C130009A20 gene                                          | 2.85 |
| 1416301_a_at | <i>Ebf1</i>          | early B-cell factor 1                                               | 2.85 |
| 1439847_s_at | <i>Klf12</i>         | Kruppel-like factor 12                                              | 2.85 |
| 1436101_at   | <i>Rnf24</i>         | ring finger protein 24                                              | 2.85 |
| 1420425_at   | <i>Prdm1</i>         | PR domain containing 1, with ZNF domain                             | 2.85 |
| 1453556_x_at | <i>Cd99</i>          | CD99 antigen                                                        | 2.84 |
| 1451199_at   | <i>Qtrtd1</i>        | queuine tRNA-ribosyltransferase domain containing 1                 | 2.83 |
| 1428242_at   | <i>Hmha1</i>         | histocompatibility (minor) HA-1                                     | 2.82 |
| 1425557_x_at | <i>Tsc22d3</i>       | TSC22 domain family 3                                               | 2.82 |
| 1423757_x_at | <i>Igfbp4</i>        | insulin-like growth factor binding protein 4                        | 2.82 |
| 1439278_at   | <i>Zbtb20</i>        | zinc finger and BTB domain containing 20                            | 2.81 |
| 1436698_x_at | <i>BC054438</i>      | cDNA sequence BC054438                                              | 2.80 |
| 1437378_x_at | <i>Scarb1</i>        | scavenger receptor class B, member 1                                | 2.79 |
| 1427020_at   | <i>Scara3</i>        | scavenger receptor class A, member 3                                | 2.79 |
| 1456532_at   | <i>Pdgfd</i>         | Platelet-derived growth factor, D polypeptide                       | 2.79 |
| 1417040_a_at | <i>Bok</i>           | Bcl-2-related ovarian killer protein                                | 2.79 |
| 1449054_a_at | <i>Pcbp4</i>         | poly(rC) binding protein 4                                          | 2.78 |
| 1436791_at   | <i>Wnt5a</i>         | wingless-related MMTV integration site 5A                           | 2.78 |
| 1435385_at   | <i>Tshz2</i>         | teashirt zinc finger family member 2                                | 2.78 |
| 1444956_at   | <i>Gabarapl2</i>     | Gamma-aminobutyric acid (GABA-A) receptor-associated protein-like 2 | 2.77 |
| 1437673_at   | ---                  | Transcribed locus                                                   | 2.77 |
| 1433587_at   | <i>Rgmb</i>          | RGM domain family, member B                                         | 2.77 |
| 1420772_a_at | <i>Tsc22d3</i>       | TSC22 domain family 3                                               | 2.76 |
| 1427278_at   | <i>Rsnl2</i>         | restin-like 2                                                       | 2.75 |
| 1448942_at   | <i>Gng11</i>         | guanine nucleotide binding protein (G protein), gamma 11            | 2.75 |
| 1456885_at   | ---                  | Transcribed locus                                                   | 2.75 |
| 1436173_at   | <i>Dlc1</i>          | deleted in liver cancer 1                                           | 2.75 |
| 1416623_at   | <i>Thbs3</i>         | thrombospondin 3                                                    | 2.74 |
| 1439128_at   | <i>Zbtb20</i>        | zinc finger and BTB domain containing 20                            | 2.74 |
| 1453724_a_at | <i>Serpinf1</i>      | serine (or cysteine) peptidase inhibitor, clade F, member 1         | 2.74 |
| 1421073_a_at | <i>Ptger4</i>        | prostaglandin E receptor 4 (subtype EP4)                            | 2.74 |
| 1449028_at   | <i>Rhou</i>          | ras homolog gene family, member U                                   | 2.74 |
| 1460208_at   | <i>Fbn1</i>          | fibrillin 1                                                         | 2.73 |
| 1447948_at   | <i>A430107O13Rik</i> | RIKEN cDNA A430107O13 gene                                          | 2.73 |
| 1419758_at   | <i>Abcb1a</i>        | ATP-binding cassette, sub-family B (MDR/TAP), member 1A             | 2.72 |
| 1428568_at   | <i>B230217C12Rik</i> | RIKEN cDNA B230217C12 gene                                          | 2.72 |
| 1418745_at   | <i>Omd</i>           | osteomodulin                                                        | 2.72 |
| 1418382_at   | <i>Apcdd1</i>        | adenomatosis polyposis coli down-regulated 1                        | 2.71 |
| 1436665_a_at | <i>Ltbp4</i>         | latent transforming growth factor beta binding protein 4            | 2.71 |
| 1434639_at   | <i>Kbtbd9</i>        | kelch repeat and BTB (POZ) domain containing 9                      | 2.71 |

|              |                             |                                                                                                                                            |      |
|--------------|-----------------------------|--------------------------------------------------------------------------------------------------------------------------------------------|------|
| 1452590_a_at | <i>Plac9</i>                | placenta specific 9                                                                                                                        | 2.70 |
| 1433586_at   | <i>Rgmb</i>                 | RGM domain family, member B                                                                                                                | 2.70 |
| 1448673_at   | <i>Pvrl3</i>                | poliovirus receptor-related 3                                                                                                              | 2.70 |
| 1422550_a_at | <i>Mtap6</i>                | microtubule-associated protein 6                                                                                                           | 2.70 |
| 1450276_a_at | <i>Scin</i>                 | scinderin                                                                                                                                  | 2.70 |
| 1419834_x_at | <i>Mark1</i>                | MAP/microtubule affinity-regulating kinase 1                                                                                               | 2.69 |
| 1424221_at   | <i>Susd4</i>                | sushi domain containing 4                                                                                                                  | 2.69 |
| 1448908_at   | <i>Ppap2b</i>               | phosphatidic acid phosphatase type 2B                                                                                                      | 2.69 |
| 1416368_at   | <i>Gsta4</i>                | glutathione S-transferase, alpha 4                                                                                                         | 2.69 |
| 1435386_at   | <i>Vwf</i>                  | Von Willebrand factor homolog                                                                                                              | 2.69 |
| 1419681_a_at | <i>Prok2</i>                | prokineticin 2                                                                                                                             | 2.68 |
| 1415964_at   | <i>Scd1</i>                 | stearoyl-Coenzyme A desaturase 1                                                                                                           | 2.68 |
| 1449070_x_at | <i>Apcdd1</i>               | adenomatosis polyposis coli down-regulated 1                                                                                               | 2.68 |
| 1423379_at   | <i>Nfatc4</i> /// LOC672021 | nuclear factor of activated T-cells, cytoplasmic, calcineurin-dependent 4 /// similar to cytoplasmic nuclear factor of activated T-cells 4 | 2.68 |
| 1435468_at   | <i>C76566</i>               | expressed sequence C76566                                                                                                                  | 2.66 |
| 1435361_at   | ---                         | ---                                                                                                                                        | 2.66 |
| 1418910_at   | <i>Bmp7</i>                 | bone morphogenetic protein 7                                                                                                               | 2.66 |
| 1433523_at   | <i>D930005D10Rik</i>        | RIKEN cDNA D930005D10 gene                                                                                                                 | 2.65 |
| 1448293_at   | ---                         | ---                                                                                                                                        | 2.65 |
| 1430012_at   | <i>1110050K14Rik</i>        | RIKEN cDNA 1110050K14 gene                                                                                                                 | 2.65 |
| 1448276_at   | <i>Tspan4</i>               | tetraspanin 4                                                                                                                              | 2.64 |
| 1433526_at   | <i>Klhl8</i>                | kelch-like 8 (Drosophila)                                                                                                                  | 2.64 |
| 1438202_at   | <i>C920005C14Rik</i>        | RIKEN cDNA C920005C14 gene                                                                                                                 | 2.63 |
| 1452660_s_at | <i>Klhl7</i>                | kelch-like 7 (Drosophila)                                                                                                                  | 2.63 |
| 1419688_at   | <i>Gpc6</i>                 | glypican 6                                                                                                                                 | 2.63 |
| 1433643_at   | <i>Cacna2d1</i>             | calcium channel, voltage-dependent, alpha2/delta subunit 1                                                                                 | 2.63 |
| 1425660_at   | <i>Btbtd3</i>               | BTB (POZ) domain containing 3                                                                                                              | 2.63 |
| 1422673_at   | <i>Prkcm</i>                | protein kinase C, mu                                                                                                                       | 2.62 |
| 1416625_at   | <i>Serping1</i>             | serine (or cysteine) peptidase inhibitor, clade G, member 1                                                                                | 2.62 |
| 1428808_at   | <i>Prickle2</i>             | prickle-like 2 (Drosophila)                                                                                                                | 2.62 |
| 1452666_a_at | <i>Tmcc2</i>                | transmembrane and coiled-coil domains 2                                                                                                    | 2.62 |
| 1439380_x_at | <i>Gtl2</i>                 | GTL2, imprinted maternally expressed untranslated mRNA                                                                                     | 2.62 |
| 1449531_at   | <i>Leprel2</i>              | leprecan-like 2                                                                                                                            | 2.61 |
| 1460292_a_at | <i>Smarca1</i>              | SWI/SNF related, matrix associated, actin dependent regulator of chromatin, subfamily a, member 1                                          | 2.61 |
| 1421462_a_at | <i>Lepre1</i>               | leprecan 1                                                                                                                                 | 2.60 |
| 1417271_a_at | <i>Eng</i>                  | endoglin                                                                                                                                   | 2.60 |
| 1424246_a_at | <i>Tes</i>                  | testis derived transcript                                                                                                                  | 2.60 |
| 1438354_x_at | <i>Cnn3</i>                 | Calponin 3, acidic                                                                                                                         | 2.59 |
| 1452160_at   | <i>Tiparp</i>               | TCDD-inducible poly(ADP-ribose) polymerase                                                                                                 | 2.59 |
| 1437165_a_at | <i>Pcolce</i>               | procollagen C-endopeptidase enhancer protein                                                                                               | 2.59 |

|              |                      |                                                             |      |
|--------------|----------------------|-------------------------------------------------------------|------|
| 1436041_at   | ---                  | ---                                                         | 2.59 |
| 1449002_at   | <i>Phlda3</i>        | pleckstrin homology-like domain, family A, member 3         | 2.59 |
| 1451978_at   | <i>Loxl1</i>         | lysyl oxidase-like 1                                        | 2.59 |
| 1420667_at   | <i>Doc2b</i>         | double C2, beta                                             | 2.59 |
| 1416781_at   | <i>Praf2</i>         | PRA1 domain family 2                                        | 2.58 |
| 1444890_at   | <i>AA536749</i>      | Expressed sequence AA536749                                 | 2.58 |
| 1421233_at   | <i>Pknox1</i>        | Pbx/knotted 1 homeobox                                      | 2.58 |
| 1423854_a_at | <i>Rasl11b</i>       | RAS-like, family 11, member B                               | 2.57 |
| 1417627_a_at | <i>Limk1</i>         | LIM-domain containing, protein kinase                       | 2.57 |
| 1422889_at   | <i>Pcdh18</i>        | protocadherin 18                                            | 2.57 |
| 1430341_at   | <i>Nudt5</i>         | nudix (nucleoside diphosphate linked moiety X)-type motif 5 | 2.57 |
| 1454708_at   | <i>Ablim1</i>        | actin-binding LIM protein 1                                 | 2.57 |
| 1454822_x_at | <i>Apcdd1</i>        | adenomatosis polyposis coli down-regulated 1                | 2.56 |
| 1432057_a_at | <i>Prdm5</i>         | PR domain containing 5                                      | 2.56 |
| 1451264_at   | <i>Frmf6</i>         | FERM domain containing 6                                    | 2.56 |
| 1434353_at   | <i>Sfmbt2</i>        | Scm-like with four mbt domains 2                            | 2.56 |
| 1444761_at   | <i>Ccdc8</i>         | Coiled-coil domain containing 8                             | 2.56 |
| 1433471_at   | <i>Tcf7</i>          | transcription factor 7, T-cell specific                     | 2.56 |
| 1436658_at   | <i>B130024G19Rik</i> | RIKEN cDNA B130024G19 gene                                  | 2.56 |
| 1420385_at   | <i>Gna14</i>         | guanine nucleotide binding protein, alpha 14                | 2.55 |
| 1448433_a_at | <i>Pcolce</i>        | procollagen C-endopeptidase enhancer protein                | 2.54 |
| 1426631_at   | <i>Pus7</i>          | pseudouridylate synthase 7 homolog (S. cerevisiae)          | 2.54 |
| 1438443_at   | <i>Zbtb20</i>        | zinc finger and BTB domain containing 20                    | 2.54 |
| 1418377_a_at | <i>Siva</i>          | Cd27 binding protein (Hindu God of destruction)             | 2.53 |
| 1435880_at   | <i>Ankrd50</i>       | ankrin repeat domain 50                                     | 2.53 |
| 1434594_at   | <i>Dnahc1</i>        | dynein, axonemal, heavy chain 1                             | 2.53 |
| 1419759_at   | <i>Abcb1a</i>        | ATP-binding cassette, sub-family B (MDR/TAP), member 1A     | 2.52 |
| 1454403_at   | <i>4930466I24Rik</i> | RIKEN cDNA 4930466I24 gene                                  | 2.52 |
| 1422064_a_at | <i>Zbtb20</i>        | zinc finger and BTB domain containing 20                    | 2.52 |
| 1436063_at   | <i>Loxl1</i>         | lysyl oxidase-like 1                                        | 2.51 |
| 1436870_s_at | <i>AU041783</i>      | expressed sequence AU041783                                 | 2.51 |
| 1429752_x_at | <i>Rsl2</i>          | restin-like 2                                               | 2.51 |
| 1460373_a_at | <i>Setd4</i>         | SET domain containing 4                                     | 2.51 |
| 1417497_at   | <i>Cp</i>            | ceruloplasmin                                               | 2.51 |
| 1437101_at   | <i>Lats2</i>         | large tumor suppressor 2                                    | 2.50 |
| 1423845_at   | <i>Csdc2</i>         | cold shock domain containing C2, RNA binding                | 2.50 |
| 1417625_s_at | <i>Cmkor1</i>        | chemokine orphan receptor 1                                 | 2.49 |
| 1424250_a_at | <i>Arhgef3</i>       | Rho guanine nucleotide exchange factor (GEF) 3              | 2.49 |
| 1426399_at   | <i>Vwa1</i>          | von Willebrand factor A domain containing 1                 | 2.49 |
| 1422890_at   | <i>Pcdh18</i>        | protocadherin 18                                            | 2.49 |
| 1419464_at   | <i>2810046M22Rik</i> | RIKEN cDNA 2810046M22 gene                                  | 2.49 |

|              |                      |                                                               |      |
|--------------|----------------------|---------------------------------------------------------------|------|
| 1431798_a_at | <i>Syde1</i>         | synapse defective 1, Rho GTPase, homolog 1 (C. elegans)       | 2.48 |
| 1452432_at   | <i>Tfpi</i>          | tissue factor pathway inhibitor                               | 2.48 |
| 1424886_at   | <i>Ptprd</i>         | protein tyrosine phosphatase, receptor type, D                | 2.48 |
| 1456976_at   | <i>Wnt5a</i>         | wingless-related MMTV integration site 5A                     | 2.47 |
| 1436269_s_at | <i>Htra2</i>         | HtrA serine peptidase 2                                       | 2.47 |
| 1455170_at   | <i>2810001G20Rik</i> | RIKEN cDNA 2810001G20 gene                                    | 2.47 |
| 1429671_at   | <i>2410018M08Rik</i> | RIKEN cDNA 2410018M08 gene                                    | 2.47 |
| 1417836_at   | <i>Gpx7</i>          | glutathione peroxidase 7                                      | 2.47 |
| 1431237_at   | <i>Nr2f2</i>         | nuclear receptor subfamily 2, group F, member 2               | 2.46 |
| 1417933_at   | <i>Igfbp6</i>        | insulin-like growth factor binding protein 6                  | 2.46 |
| 1456389_at   | <i>Zfx1b</i>         | zinc finger homeobox 1b                                       | 2.46 |
| 1425875_a_at | <i>Lepr</i>          | leptin receptor                                               | 2.46 |
| 1438886_at   | <i>Heyl</i>          | hairly/enhancer-of-split related with YRPW motif-like         | 2.46 |
| 1445274_at   | <i>BC024063</i>      | cDNA sequence BC024063                                        | 2.46 |
| 1456380_x_at | <i>Cnn3</i>          | calponin 3, acidic                                            | 2.46 |
| 1419380_at   | <i>Zfp423</i>        | zinc finger protein 423                                       | 2.46 |
| 1420858_at   | <i>Pkia</i>          | protein kinase inhibitor, alpha                               | 2.45 |
| 1449588_at   | <i>Abca4</i>         | ATP-binding cassette, sub-family A (ABC1), member 4           | 2.45 |
| 1447788_s_at | <i>Tspyl3</i>        | TSPY-like 3                                                   | 2.45 |
| 1433805_at   | <i>Jak1</i>          | Janus kinase 1                                                | 2.45 |
| 1435987_x_at | <i>1110059G02Rik</i> | RIKEN cDNA 1110059G02 gene                                    | 2.45 |
| 1416159_at   | <i>Nr2f2</i>         | nuclear receptor subfamily 2, group F, member 2               | 2.45 |
| 1439284_at   | <i>E230025E14Rik</i> | RIKEN cDNA E230025E14 gene                                    | 2.45 |
| 1416050_a_at | <i>Scarb1</i>        | scavenger receptor class B, member 1                          | 2.44 |
| 1428108_x_at | <i>Tmcc2</i>         | transmembrane and coiled-coil domains 2                       | 2.44 |
| 1424724_a_at | <i>D16Ert472e</i>    | DNA segment, Chr 16, ERATO Doi 472, expressed                 | 2.44 |
| 1440093_at   | <i>Ednra</i>         | endothelin receptor type A                                    | 2.43 |
| 1449851_at   | <i>Per1</i>          | period homolog 1 (Drosophila)                                 | 2.43 |
| 1449450_at   | <i>Ptges</i>         | prostaglandin E synthase                                      | 2.42 |
| 1423551_at   | <i>Cdh13</i>         | cadherin 13                                                   | 2.42 |
| 1424906_at   | <i>Pqlc3</i>         | PQ loop repeat containing                                     | 2.42 |
| 1448475_at   | <i>Olfml3</i>        | olfactomedin-like 3                                           | 2.42 |
| 1426539_at   | <i>Usp11</i>         | ubiquitin specific peptidase 11                               | 2.42 |
| 1429052_at   | <i>Ptprd</i>         | protein tyrosine phosphatase, receptor type, D                | 2.41 |
| 1416798_a_at | <i>Nme4</i>          | expressed in non-metastatic cells 4, protein                  | 2.41 |
| 1423584_at   | <i>Igfbp7</i>        | insulin-like growth factor binding protein 7                  | 2.41 |
| 1441945_s_at | <i>Abhd14a</i>       | abhydrolase domain containing 14A                             | 2.41 |
| 1425293_a_at | <i>Zcchc18</i>       | zinc finger, CCHC domain containing 18                        | 2.40 |
| 1440397_at   | ---                  | ---                                                           | 2.40 |
| 1427081_at   | <i>A630072M18Rik</i> | RIKEN cDNA A630072M18 gene                                    | 2.40 |
| 1460404_at   | <i>Sr278</i>         | stretch responsive protein 278                                | 2.40 |
| 1454023_a_at | <i>D1Bwg1363e</i>    | DNA segment, Chr 1, Brigham & Women's Genetics 1363 expressed | 2.40 |



|              |                      |                                                                                |      |
|--------------|----------------------|--------------------------------------------------------------------------------|------|
| 1449999_a_at | <i>Cacna2d1</i>      | calcium channel, voltage-dependent, alpha2/delta subunit 1                     | 2.40 |
| 1452573_a_at | <i>Sr278</i>         | stretch responsive protein 278                                                 | 2.39 |
| 1417018_at   | <i>Efemp2</i>        | epidermal growth factor-containing fibulin-like extracellular matrix protein 2 | 2.39 |
| 1419557_a_at | <i>Tmem9</i>         | transmembrane protein 9                                                        | 2.39 |
| 1424524_at   | <i>1200002N14Rik</i> | RIKEN cDNA 1200002N14 gene                                                     | 2.39 |
| 1426397_at   | <i>Tgfr2</i>         | transforming growth factor, beta receptor II                                   | 2.38 |
| 1460602_at   | <i>Dlc1</i>          | deleted in liver cancer 1                                                      | 2.38 |
| 1456410_at   | <i>AU045128</i>      | expressed sequence AU045128                                                    | 2.38 |
| 1438530_at   | <i>Tfpi</i>          | tissue factor pathway inhibitor                                                | 2.38 |
| 1453103_at   | <i>Ablim1</i>        | actin-binding LIM protein 1                                                    | 2.38 |
| 1443960_at   | ---                  | ---                                                                            | 2.37 |
| 1434130_at   | <i>Lhfp12</i>        | lipoma HMGIC fusion partner-like 2                                             | 2.37 |
| 1454015_a_at | <i>Cdh13</i>         | cadherin 13                                                                    | 2.37 |
| 1427167_at   | <i>AI448196</i>      | expressed sequence AI448196                                                    | 2.37 |
| 1424932_at   | <i>Egfr</i>          | epidermal growth factor receptor                                               | 2.37 |
| 1425650_at   | <i>Tle4</i>          | transducin-like enhancer of split 4, homolog of Drosophila E(spl)              | 2.36 |
| 1450853_at   | <i>Tle4</i>          | transducin-like enhancer of split 4, homolog of Drosophila E(spl)              | 2.36 |
| 1433803_at   | <i>Jak1</i>          | Janus kinase 1                                                                 | 2.36 |
| 1456756_at   | <i>E430016P22Rik</i> | RIKEN cDNA E430016P22 gene                                                     | 2.36 |
| 1423805_at   | <i>Dab2</i>          | disabled homolog 2 (Drosophila)                                                | 2.35 |
| 1456473_x_at | <i>Arf2</i>          | ADP-ribosylation factor 2                                                      | 2.35 |
| 1449514_at   | <i>Gprk5</i>         | G protein-coupled receptor kinase 5                                            | 2.34 |
| 1460222_at   | <i>Sh3bp1</i>        | SH3-domain binding protein 1                                                   | 2.34 |
| 1427180_at   | <i>Slc27a3</i>       | solute carrier family 27 (fatty acid transporter), member 3                    | 2.34 |
| 1430604_a_at | <i>Dab2</i>          | disabled homolog 2 (Drosophila)                                                | 2.33 |
| 1452029_a_at | <i>Purg</i>          | purine-rich element binding protein G                                          | 2.33 |
| 1421890_at   | <i>St3gal2</i>       | ST3 beta-galactoside alpha-2,3-sialyltransferase 2                             | 2.33 |
| 1423760_at   | <i>Cd44</i>          | CD44 antigen                                                                   | 2.32 |
| 1422985_at   | <i>Fzd1</i>          | frizzled homolog 1 (Drosophila)                                                | 2.32 |
| 1438793_x_at | <i>1200007D18Rik</i> | RIKEN cDNA 1200007D18 gene                                                     | 2.32 |
| 1449055_x_at | <i>Pcbp4</i>         | poly(rC) binding protein 4                                                     | 2.32 |
| 1455862_at   | <i>9630054F20Rik</i> | RIKEN cDNA 9630054F20 gene                                                     | 2.32 |
| 1429234_s_at | <i>11-Sep</i>        | septin 11                                                                      | 2.32 |
| 1416491_at   | <i>Numb1</i>         | numb-like                                                                      | 2.32 |
| 1450406_a_at | <i>St3gal3</i>       | ST3 beta-galactoside alpha-2,3-sialyltransferase 3                             | 2.31 |
| 1421269_at   | <i>Ugcg</i>          | UDP-glucose ceramide glucosyltransferase                                       | 2.31 |
| 1437406_x_at | <i>Igfbp4</i>        | insulin-like growth factor binding protein 4                                   | 2.31 |
| 1428371_at   | <i>2610507N02Rik</i> | RIKEN cDNA 2610507N02 gene                                                     | 2.31 |
| 1435701_at   | <i>Dnajb6</i>        | DnaJ (Hsp40) homolog, subfamily B, member 6                                    | 2.31 |
| 1416515_at   | <i>Fscn1</i>         | fascin homolog 1, actin bundling protein (Strongylocentrotus purpuratus)       | 2.30 |
| 1419757_at   | <i>Pitpnm2</i>       | phosphatidylinositol transfer protein, membrane-associated 2                   | 2.30 |
| 1417092_at   | <i>Pthr1</i>         | parathyroid hormone receptor 1                                                 | 2.30 |

|              |                                                                     |                                                                                                                                                             |      |
|--------------|---------------------------------------------------------------------|-------------------------------------------------------------------------------------------------------------------------------------------------------------|------|
| 1423425_at   | <i>1300012G16Rik</i>                                                | RIKEN cDNA 1300012G16 gene                                                                                                                                  | 2.30 |
| 1436877_at   | <i>Lrch2</i>                                                        | leucine-rich repeats and calponin homology (CH) domain containing 2                                                                                         | 2.29 |
| 1438181_x_at | <i>Tm2d2</i>                                                        | TM2 domain containing 2                                                                                                                                     | 2.29 |
| 1456483_at   | <i>Zfp9</i>                                                         | zinc finger protein 9                                                                                                                                       | 2.28 |
| 1451355_at   | <i>Asah3l</i>                                                       | N-acylsphingosine amidohydrolase 3-like                                                                                                                     | 2.28 |
| 1452283_at   | <i>Rassf8</i>                                                       | Ras association (RalGDS/AF-6) domain family 8                                                                                                               | 2.28 |
| 1428091_at   | <i>Klhl7</i>                                                        | kelch-like 7 (Drosophila)                                                                                                                                   | 2.28 |
| 1435605_at   | <i>Actr3b</i>                                                       | ARP3 actin-related protein 3 homolog B (yeast)                                                                                                              | 2.27 |
| 1435737_a_at | <i>Nde1</i>                                                         | nuclear distribution gene E homolog 1 (A nidulans)                                                                                                          | 2.27 |
| 1455820_x_at | <i>Scarb1</i>                                                       | scavenger receptor class B, member 1                                                                                                                        | 2.27 |
| 1444063_at   | <i>5430435G22Rik</i>                                                | RIKEN cDNA 5430435G22 gene                                                                                                                                  | 2.27 |
| 1448894_at   | <i>Akr1b8</i>                                                       | aldo-keto reductase family 1, member B8                                                                                                                     | 2.27 |
| 1455570_x_at | <i>Cnn3</i>                                                         | calponin 3, acidic                                                                                                                                          | 2.27 |
| 1417080_a_at | <i>Ecsit</i>                                                        | ECSIT homolog (Drosophila)                                                                                                                                  | 2.27 |
| 1458887_at   | <i>Tcf21</i>                                                        | transcription factor 21                                                                                                                                     | 2.27 |
| 1436954_at   | <i>Waspip</i>                                                       | Wiskott-Aldrich syndrome protein interacting protein                                                                                                        | 2.26 |
| 1418892_at   | <i>Rhoj</i>                                                         | ras homolog gene family, member J                                                                                                                           | 2.26 |
| 1428720_s_at | <i>IgI-V1 /// 2010309G21Rik<br/>/// LOC207685 ///<br/>LOC386520</i> | immunoglobulin lambda chain, variable 1 /// RIKEN cDNA 2010309G21 gene /// hypothetical protein LOC207685 /// similar to Ig lambda-3 chain C region - mouse | 2.26 |
| 1456147_at   | <i>St8sia6</i>                                                      | ST8 alpha-N-acetyl-neuraminide alpha-2,8-sialyltransferase 6                                                                                                | 2.26 |
| 1435504_at   | ---                                                                 | Transcribed locus                                                                                                                                           | 2.26 |
| 1451123_at   | <i>C330016O10Rik</i>                                                | RIKEN cDNA C330016O10 gene                                                                                                                                  | 2.26 |
| 1416529_at   | <i>Emp1</i>                                                         | epithelial membrane protein 1                                                                                                                               | 2.26 |
| 1448602_at   | <i>Pygm</i>                                                         | muscle glycogen phosphorylase                                                                                                                               | 2.26 |
| 1439373_x_at | <i>Wnt5b</i>                                                        | wingless-related MMTV integration site 5B                                                                                                                   | 2.26 |
| 1437149_at   | <i>Slc6a6</i>                                                       | solute carrier family 6 (neurotransmitter transporter, taurine), member 6                                                                                   | 2.26 |
| 1434492_at   | <i>A130022J15Rik</i>                                                | RIKEN cDNA A130022J15 gene                                                                                                                                  | 2.25 |
| 1430514_a_at | <i>Cd99</i>                                                         | CD99 antigen                                                                                                                                                | 2.25 |
| 1417220_at   | <i>Fah</i>                                                          | fumarylacetoacetate hydrolase                                                                                                                               | 2.25 |
| 1424669_at   | <i>Zfyve21</i>                                                      | zinc finger, FYVE domain containing 21                                                                                                                      | 2.25 |
| 1438661_a_at | <i>Arf2</i>                                                         | ADP-ribosylation factor 2                                                                                                                                   | 2.25 |
| 1418459_at   | <i>Ccdc91</i>                                                       | coiled-coil domain containing 91                                                                                                                            | 2.25 |
| 1448562_at   | <i>Upp1</i>                                                         | uridine phosphorylase 1                                                                                                                                     | 2.24 |
| 1439348_at   | <i>S100a10</i>                                                      | S100 calcium binding protein A10 (calpactin)                                                                                                                | 2.24 |
| 1458642_at   | <i>Klre1</i>                                                        | killer cell lectin-like receptor family E member 1                                                                                                          | 2.24 |
| 1421641_at   | <i>Slc6a2</i>                                                       | solute carrier family 6 (neurotransmitter transporter, noradrenalin), member 2                                                                              | 2.23 |
| 1437405_a_at | <i>Igfbp4</i>                                                       | insulin-like growth factor binding protein 4                                                                                                                | 2.23 |
| 1424163_at   | <i>Rmnd5b</i>                                                       | required for meiotic nuclear division 5 homolog B (S. cerevisiae)                                                                                           | 2.23 |
| 1436759_x_at | <i>Cnn3</i>                                                         | calponin 3, acidic                                                                                                                                          | 2.23 |

|              |                           |                                                                                                                                    |      |
|--------------|---------------------------|------------------------------------------------------------------------------------------------------------------------------------|------|
| 1426801_at   | 8-Sep                     | septin 8                                                                                                                           | 2.22 |
| 1460495_s_at | <i>Htra2</i>              | HtrA serine peptidase 2                                                                                                            | 2.22 |
| 1434524_at   | <i>Eif2b3</i>             | eukaryotic translation initiation factor 2B, subunit 3                                                                             | 2.22 |
| 1436071_at   | <i>Ankrd26</i>            | Ankyrin repeat domain 26                                                                                                           | 2.22 |
| 1429065_at   | <i>1200009F10Rik</i>      | RIKEN cDNA 1200009F10 gene                                                                                                         | 2.22 |
| 1449310_at   | <i>Ptger2</i>             | prostaglandin E receptor 2 (subtype EP2)                                                                                           | 2.22 |
| 1416221_at   | <i>Fstl1</i>              | follistatin-like 1                                                                                                                 | 2.21 |
| 1416360_at   | <i>Snag1</i>              | sorting nexin associated golgi protein 1                                                                                           | 2.21 |
| 1423677_at   | <i>Fkbp9</i>              | FK506 binding protein 9                                                                                                            | 2.21 |
| 1451080_at   | <i>Usp1</i>               | ubiquitin specific peptdiase 1                                                                                                     | 2.21 |
| 1451298_at   | <i>Plekhk3</i>            | pleckstrin homology domain containing, family H (with MyTH4 domain) member 3                                                       | 2.21 |
| 1421867_at   | <i>Nr3c1</i>              | nuclear receptor subfamily 3, group C, member 1                                                                                    | 2.20 |
| 1423675_at   | <i>Usp1</i>               | ubiquitin specific peptdiase 1                                                                                                     | 2.20 |
| 1452387_a_at | <i>Amotl2</i>             | angiominin like 2                                                                                                                  | 2.20 |
| 1451469_at   | <i>D530005L17Rik</i>      | RIKEN cDNA D530005L17 gene                                                                                                         | 2.19 |
| 1429167_at   | <i>Ccdc112</i>            | coiled-coil domain containing 112                                                                                                  | 2.19 |
| 1424123_at   | <i>BC011209</i>           | cDNA sequence BC011209                                                                                                             | 2.19 |
| 1417401_at   | <i>Rai14</i>              | retinoic acid induced 14                                                                                                           | 2.19 |
| 1428789_at   | <i>Ralgps2</i>            | Ral GEF with PH domain and SH3 binding motif 2                                                                                     | 2.19 |
| 1453286_at   | <i>Plxna2</i>             | plexin A2                                                                                                                          | 2.19 |
| 1434115_at   | ---                       | ---                                                                                                                                | 2.19 |
| 1434581_at   | ---                       | ---                                                                                                                                | 2.18 |
| 1426448_at   | <i>Pja1</i>               | praja1, RING-H2 motif containing                                                                                                   | 2.18 |
| 1422047_at   | <i>Cdh5</i>               | cadherin 5                                                                                                                         | 2.18 |
| 1437364_at   | <i>Coq3</i>               | coenzyme Q3 homolog, methyltransferase (yeast)                                                                                     | 2.18 |
| 1450468_at   | <i>Myoc</i>               | myocilin                                                                                                                           | 2.18 |
| 1425850_a_at | <i>Nek6</i> /// LOC674247 | NIMA (never in mitosis gene a)-related expressed kinase 6 /// similar to NIMA (never in mitosis gene a)-related expressed kinase 6 | 2.17 |
| 1451344_at   | <i>Tmem119</i>            | transmembrane protein 119                                                                                                          | 2.17 |
| 1436204_at   | <i>1110059G02Rik</i>      | RIKEN cDNA 1110059G02 gene                                                                                                         | 2.17 |
| 1422912_at   | <i>Bmp4</i>               | bone morphogenetic protein 4                                                                                                       | 2.16 |
| 1431028_a_at | <i>Pank1</i>              | pantothenate kinase 1                                                                                                              | 2.16 |
| 1443782_x_at | <i>Cyp20a1</i>            | cytochrome P450, family 20, subfamily A, polypeptide 1                                                                             | 2.16 |
| 1418397_at   | <i>Zfp275</i>             | zinc finger protein 275                                                                                                            | 2.16 |
| 1437284_at   | <i>Fzd1</i>               | frizzled homolog 1 (Drosophila)                                                                                                    | 2.15 |
| 1424692_at   | <i>2810055F11Rik</i>      | RIKEN cDNA 2810055F11 gene                                                                                                         | 2.15 |
| 1418296_at   | <i>Fxyd5</i>              | FXYD domain-containing ion transport regulator 5                                                                                   | 2.15 |
| 1427912_at   | <i>Cbr3</i>               | carbonyl reductase 3                                                                                                               | 2.15 |
| 1429447_at   | <i>Evc2</i>               | Ellis van Creveld syndrome 2 homolog (human)                                                                                       | 2.15 |
| 1449062_at   | <i>Khk</i>                | ketohehexokinase                                                                                                                   | 2.15 |
| 1421133_at   | <i>Pvrl3</i>              | poliovirus receptor-related 3                                                                                                      | 2.15 |
| 1452340_at   | <i>6820424L24Rik</i>      | RIKEN cDNA 6820424L24 gene                                                                                                         | 2.15 |

|              |                                              |                                                                                                                                                            |      |
|--------------|----------------------------------------------|------------------------------------------------------------------------------------------------------------------------------------------------------------|------|
| 1451411_at   | <i>Gprc5b</i>                                | G protein-coupled receptor, family C, group 5, member B                                                                                                    | 2.15 |
| 1437908_a_at | <i>1200007D18Rik</i>                         | RIKEN cDNA 1200007D18 gene                                                                                                                                 | 2.15 |
| 1434424_at   | <i>9630055N22Rik</i> ///<br><i>LOC670389</i> | RIKEN cDNA 9630055N22 gene /// similar to Feline leukemia virus subgroup C receptor-related protein 1 (Feline leukemia virus subgroup C receptor) (hFLVCR) | 2.14 |
| 1423674_at   | <i>Usp1</i>                                  | ubiquitin specific peptdiase 1                                                                                                                             | 2.14 |
| 1429514_at   | <i>Ppap2b</i>                                | phosphatidic acid phosphatase type 2B                                                                                                                      | 2.14 |
| 1434740_at   | <i>Scarf2</i>                                | scavenger receptor class F, member 2                                                                                                                       | 2.14 |
| 1416459_at   | <i>Arf2</i>                                  | ADP-ribosylation factor 2                                                                                                                                  | 2.14 |
| 1431655_a_at | <i>Mulk</i>                                  | multiple substrate lipid kinase                                                                                                                            | 2.14 |
| 1450533_a_at | <i>Plagl1</i>                                | pleiomorphic adenoma gene-like 1                                                                                                                           | 2.14 |
| 1418084_at   | <i>Nrp1</i>                                  | neuropilin 1                                                                                                                                               | 2.13 |
| 1429205_at   | <i>Mllt3</i>                                 | myeloid/lymphoid or mixed lineage-leukemia translocation to 3 homolog (Drosophila)                                                                         | 2.13 |
| 1423104_at   | <i>Irs1</i>                                  | insulin receptor substrate 1                                                                                                                               | 2.13 |
| 1460303_at   | <i>Nr3c1</i>                                 | nuclear receptor subfamily 3, group C, member 1                                                                                                            | 2.13 |
| 1435537_at   | <i>Ptprd</i>                                 | protein tyrosine phosphatase, receptor type, D                                                                                                             | 2.13 |
| 1425911_a_at | <i>Fgfr1</i>                                 | fibroblast growth factor receptor 1                                                                                                                        | 2.13 |
| 1455177_at   | <i>Ahi1</i>                                  | Abelson helper integration site                                                                                                                            | 2.13 |
| 1424089_a_at | <i>Tcf4</i>                                  | transcription factor 4                                                                                                                                     | 2.12 |
| 1455037_at   | <i>Plxna2</i>                                | plexin A2                                                                                                                                                  | 2.12 |
| 1434129_s_at | <i>Lhfp12</i>                                | lipoma HMGIC fusion partner-like 2                                                                                                                         | 2.12 |
| 1452161_at   | <i>Tiparp</i>                                | TCDD-inducible poly(ADP-ribose) polymerase                                                                                                                 | 2.12 |
| 1454876_at   | <i>Rab23</i>                                 | RAB23, member RAS oncogene family                                                                                                                          | 2.11 |
| 1428954_at   | <i>Slc9a3r2</i>                              | solute carrier family 9 (sodium/hydrogen exchanger), isoform 3 regulator 2                                                                                 | 2.11 |
| 1428429_at   | <i>Rgmb</i>                                  | RGM domain family, member B                                                                                                                                | 2.11 |
| 1433658_x_at | <i>Pcbp4</i>                                 | poly(rC) binding protein 4                                                                                                                                 | 2.11 |
| 1430539_at   | <i>1810057P16Rik</i>                         | RIKEN cDNA 1810057P16 gene                                                                                                                                 | 2.11 |
| 1418758_a_at | <i>Pscd3</i>                                 | pleckstrin homology, Sec7 and coiled-coil domains 3                                                                                                        | 2.11 |
| 1429887_at   | <i>2310005C01Rik</i>                         | RIKEN cDNA 2310005C01 gene                                                                                                                                 | 2.10 |
| 1425934_a_at | <i>B4galt4</i>                               | UDP-Gal:betaGlcNAc beta 1,4-galactosyltransferase, polypeptide 4                                                                                           | 2.10 |
| 1426724_at   | <i>Cnn3</i>                                  | calponin 3, acidic                                                                                                                                         | 2.10 |
| 1417756_a_at | <i>Lsp1</i>                                  | lymphocyte specific 1                                                                                                                                      | 2.10 |
| 1421320_a_at | <i>Qtrtd1</i>                                | queuine tRNA-ribosyltransferase domain containing 1                                                                                                        | 2.10 |
| 1442166_at   | <i>Cpne5</i>                                 | copine V                                                                                                                                                   | 2.10 |
| 1438715_at   | <i>Ccdc102a</i>                              | coiled-coil domain containing 102A                                                                                                                         | 2.10 |
| 1417900_a_at | <i>Vldlr</i>                                 | very low density lipoprotein receptor                                                                                                                      | 2.10 |
| 1431429_a_at | <i>Arl4a</i>                                 | ADP-ribosylation factor-like 4A                                                                                                                            | 2.10 |
| 1416168_at   | <i>Serpinf1</i>                              | serine (or cysteine) peptidase inhibitor, clade F, member 1                                                                                                | 2.09 |
| 1417235_at   | <i>Ehd3</i>                                  | EH-domain containing 3                                                                                                                                     | 2.09 |
| 1458664_at   | ---                                          | Transcribed locus                                                                                                                                          | 2.09 |

|              |                                         |                                                                                                                         |      |
|--------------|-----------------------------------------|-------------------------------------------------------------------------------------------------------------------------|------|
| 1428176_at   | <i>Edg5</i>                             | endothelial differentiation, sphingolipid G-protein-coupled receptor, 5                                                 | 2.09 |
| 1422399_a_at | <i>Rab23</i>                            | RAB23, member RAS oncogene family                                                                                       | 2.09 |
| 1424582_at   | <i>Mulk</i> /// LOC667266 /// LOC672697 | multiple substrate lipid kinase /// similar to multi-substrate lipid kinase /// similar to multi-substrate lipid kinase | 2.09 |
| 1429897_a_at | <i>D16Ert472e</i>                       | DNA segment, Chr 16, ERATO Doi 472, expressed                                                                           | 2.09 |
| 1417090_at   | <i>Rcn1</i>                             | reticulocalbin 1                                                                                                        | 2.08 |
| 1456189_x_at | <i>Ltbp3</i>                            | latent transforming growth factor beta binding protein 3                                                                | 2.08 |
| 1449216_at   | <i>Itgae</i>                            | integrin, alpha E, epithelial-associated                                                                                | 2.08 |
| 1417602_at   | <i>Per2</i>                             | period homolog 2 (Drosophila)                                                                                           | 2.08 |
| 1425668_a_at | <i>St3gal4</i>                          | ST3 beta-galactoside alpha-2,3-sialyltransferase 4                                                                      | 2.08 |
| 1416782_s_at | <i>Praf2</i>                            | PRA1 domain family 2                                                                                                    | 2.08 |
| 1460600_at   | <i>LOC245350</i>                        | similar to ubiquitin-conjugating enzyme E2Q (putative) 2                                                                | 2.08 |
| 1426939_at   | <i>Tsr2</i>                             | TSR2, 20S rRNA accumulation, homolog (S. cerevisiae)                                                                    | 2.08 |
| 1448298_at   | <i>Tnk2</i>                             | tyrosine kinase, non-receptor, 2                                                                                        | 2.07 |
| 1440254_at   | ---                                     | Transcribed locus, weakly similar to XP_417295.1 PREDICTED: similar to TAF3 protein [Gallus gallus]                     | 2.07 |
| 1452101_at   | <i>Blmh</i>                             | bleomycin hydrolase                                                                                                     | 2.07 |
| 1453164_a_at | <i>Ptdss2</i>                           | phosphatidylserine synthase 2                                                                                           | 2.07 |
| 1431039_at   | <i>Otud4</i>                            | OTU domain containing 4                                                                                                 | 2.07 |
| 1455057_at   | <i>Gmps</i>                             | guanine monophosphate synthetase                                                                                        | 2.07 |
| 1424399_at   | <i>Uck1</i>                             | uridine-cytidine kinase 1                                                                                               | 2.06 |
| 1439441_x_at | <i>Lats2</i>                            | large tumor suppressor 2                                                                                                | 2.06 |
| 1453061_at   | <i>2610018O07Rik</i>                    | RIKEN cDNA 2610018O07 gene                                                                                              | 2.06 |
| 1438139_at   | <i>Arhgap28</i>                         | Rho GTPase activating protein 28                                                                                        | 2.06 |
| 1420336_at   | <i>Adamts15</i>                         | ADAMTS-like 5                                                                                                           | 2.06 |
| 1422510_at   | <i>Ctdspl</i>                           | CTD (carboxy-terminal domain, RNA polymerase II, polypeptide A) small phosphatase-like                                  | 2.06 |
| 1448541_at   | <i>Kns2</i>                             | kinesin 2                                                                                                               | 2.05 |
| 1430164_a_at | <i>Grb10</i>                            | growth factor receptor bound protein 10                                                                                 | 2.05 |
| 1418773_at   | <i>Fads3</i>                            | fatty acid desaturase 3                                                                                                 | 2.05 |
| 1418927_a_at | <i>LOC671769</i>                        | similar to hyaluronic acid binding protein 4                                                                            | 2.04 |
| 1452664_a_at | <i>Tm7sf3</i>                           | transmembrane 7 superfamily member 3                                                                                    | 2.04 |
| 1427568_a_at | <i>lft80</i>                            | intraflagellar transport 80 homolog (Chlamydomonas)                                                                     | 2.04 |
| 1422115_a_at | <i>Flt3l</i>                            | FMS-like tyrosine kinase 3 ligand                                                                                       | 2.04 |
| 1435170_at   | <i>Tsr2</i>                             | TSR2, 20S rRNA accumulation, homolog (S. cerevisiae)                                                                    | 2.04 |
| 1428492_at   | <i>Glipr2</i>                           | GLI pathogenesis-related 2                                                                                              | 2.03 |
| 1419184_a_at | <i>Fhl2</i>                             | four and a half LIM domains 2                                                                                           | 2.03 |
| 1453120_at   | <i>Txndc13</i>                          | thioredoxin domain containing 13                                                                                        | 2.03 |
| 1426195_a_at | <i>Cst3</i>                             | cystatin C                                                                                                              | 2.03 |
| 1426323_x_at | <i>Siva</i>                             | Cd27 binding protein (Hindu God of destruction)                                                                         | 2.03 |

|              |                                  |                                                                                                                                    |      |
|--------------|----------------------------------|------------------------------------------------------------------------------------------------------------------------------------|------|
| 1455826_a_at | <i>Bace1</i>                     | beta-site APP cleaving enzyme 1                                                                                                    | 2.03 |
| 1457670_s_at | <i>Lmna</i>                      | lamin A                                                                                                                            | 2.03 |
| 1449632_s_at | <i>Fkbp10</i>                    | FK506 binding protein 10                                                                                                           | 2.03 |
| 1419823_s_at | <i>Ksr1</i>                      | kinase suppressor of ras 1                                                                                                         | 2.02 |
| 1431146_a_at | <i>Cpne8</i>                     | copine VIII                                                                                                                        | 2.02 |
| 1421977_at   | <i>Mmp19</i>                     | matrix metalloproteinase 19                                                                                                        | 2.02 |
| 1416803_at   | <i>Fkbp7</i>                     | FK506 binding protein 7                                                                                                            | 2.02 |
| 1455249_at   | ---                              | 10 days neonate skin cDNA, RIKEN full-length enriched library, clone:4732480G12 product:unclassifiable, full insert sequence       | 2.02 |
| 1437598_at   | <i>Zbtb20</i>                    | zinc finger and BTB domain containing 20                                                                                           | 2.02 |
| 1451830_a_at | <i>Spnb2</i>                     | spectrin beta 2                                                                                                                    | 2.02 |
| 1429233_at   |                                  | 11-Sep septin 11                                                                                                                   | 2.02 |
| 1438705_at   | <i>AI465270</i>                  | expressed sequence AI465270                                                                                                        | 2.02 |
| 1437508_at   | <i>Sp4</i>                       | trans-acting transcription factor 4                                                                                                | 2.02 |
| 1434149_at   | <i>Tcf4</i>                      | transcription factor 4                                                                                                             | 2.02 |
| 1434111_at   | <i>Lphn2</i>                     | latrophilin 2                                                                                                                      | 2.01 |
| 1426963_at   | <i>Pacs2</i>                     | phosphofurin acidic cluster sorting protein 2                                                                                      | 2.01 |
| 1457682_at   | <i>9030420J04Rik</i>             | RIKEN cDNA 9030420J04 gene                                                                                                         | 2.01 |
| 1451345_at   | <i>Mtap</i>                      | methylthioadenosine phosphorylase                                                                                                  | 2.01 |
| 1435130_at   | <i>LOC383103</i>                 | similar to RIKEN cDNA 1810036I24                                                                                                   | 2.01 |
| 1422431_at   | <i>Magee1</i>                    | melanoma antigen, family E, 1                                                                                                      | 2.01 |
| 1416003_at   | <i>Cldn11</i>                    | claudin 11                                                                                                                         | 2.01 |
| 1423816_at   | <i>Cxx1b</i>                     | CAAX box 1 homolog B (human)                                                                                                       | 2.00 |
| 1424968_at   | <i>2210023G05Rik</i>             | RIKEN cDNA 2210023G05 gene                                                                                                         | 2.00 |
| 1422028_a_at | <i>Ets1</i>                      | E26 avian leukemia oncogene 1, 5' domain                                                                                           | 2.00 |
| 1417586_at   | <i>Timeless</i>                  | timeless homolog (Drosophila)                                                                                                      | 2.00 |
| 1426758_s_at | <i>Gtl2</i>                      | GTL2, imprinted maternally expressed untranslated mRNA                                                                             | 2.00 |
| 1427233_at   | <i>Tshz1</i>                     | teashirt zinc finger family member 1                                                                                               | 2.00 |
| 1423596_at   | <i>Nek6</i> /// <i>LOC674247</i> | NIMA (never in mitosis gene a)-related expressed kinase 6 /// similar to NIMA (never in mitosis gene a)-related expressed kinase 6 | 2.00 |
| 1423013_at   | <i>Foxf1a</i>                    | forkhead box F1a                                                                                                                   | 2.00 |
| 1423503_at   | <i>Jam3</i>                      | junction adhesion molecule 3                                                                                                       | 2.00 |
| 1423883_at   | <i>Acs1</i>                      | acyl-CoA synthetase long-chain family member 1                                                                                     | 2.00 |
| 1422221_at   | <i>Hand2</i>                     | heart and neural crest derivatives expressed transcript 2                                                                          | 2.00 |
| 1434298_at   | <i>Zfmx1b</i>                    | zinc finger homeobox 1b                                                                                                            | 2.00 |
| 1448835_at   | <i>E2f6</i>                      | E2F transcription factor 6                                                                                                         | 2.00 |
| 1453212_at   | <i>Zfp383</i>                    | zinc finger protein 383                                                                                                            | 1.99 |
| 1434809_at   | <i>Arhgap28</i>                  | Rho GTPase activating protein 28                                                                                                   | 1.99 |
| 1440835_at   | <i>Zfp27</i>                     | zinc finger protein 27                                                                                                             | 1.99 |
| 1434112_at   | <i>Lphn2</i>                     | latrophilin 2                                                                                                                      | 1.99 |
| 1426988_at   | <i>Klhdc5</i>                    | kelch domain containing 5                                                                                                          | 1.98 |
| 1416359_at   | <i>Snag1</i>                     | sorting nexin associated golgi protein 1                                                                                           | 1.98 |
| 1420498_a_at | <i>Dab2</i>                      | disabled homolog 2 (Drosophila)                                                                                                    | 1.98 |
| 1416203_at   | <i>Aqp1</i>                      | aquaporin 1                                                                                                                        | 1.97 |
| 1434848_at   | ---                              | Transcribed locus                                                                                                                  | 1.97 |

|              |                                              |                                                                              |      |
|--------------|----------------------------------------------|------------------------------------------------------------------------------|------|
| 1429418_at   | <i>Cdc14b</i>                                | CDC14 cell division cycle 14 homolog B (S. cerevisiae)                       | 1.97 |
| 1422638_s_at | <i>Rassf5</i>                                | Ras association (RalGDS/AF-6) domain family 5                                | 1.97 |
| 1421268_at   | <i>Ugcg</i>                                  | UDP-glucose ceramide glucosyltransferase                                     | 1.97 |
| 1424029_at   | <i>Tspyl4</i>                                | TSPY-like 4                                                                  | 1.97 |
| 1451753_at   | <i>Plxna2</i>                                | plexin A2                                                                    | 1.97 |
| 1453065_at   | <i>Aldh5a1</i>                               | aldehyde dehydrogenase family 5, subfamily A1                                | 1.96 |
| 1448607_at   | ---                                          | ---                                                                          | 1.96 |
| 1434026_at   | <i>Atp8b2</i>                                | ATPase, class I, type 8B, member 2                                           | 1.96 |
| 1449590_a_at | <i>Mras</i>                                  | muscle and microspikes RAS                                                   | 1.96 |
| 1417327_at   | <i>Cav2</i>                                  | caveolin 2                                                                   | 1.95 |
| 1423380_s_at | <i>Nfatc4</i>                                | nuclear factor of activated T-cells, cytoplasmic, calcineurin-dependent 4    | 1.95 |
| 1452864_at   | <i>Med12l</i>                                | mediator of RNA polymerase II transcription, subunit 12 homolog (yeast)-like | 1.95 |
| 1424670_s_at | <i>Zfyve21</i>                               | zinc finger, FYVE domain containing 21                                       | 1.95 |
| 1429190_at   | <i>Arsb</i>                                  | arylsulfatase B                                                              | 1.95 |
| 1449220_at   | <i>Gimap3</i>                                | GTPase, IMAP family member 3                                                 | 1.95 |
| 1422110_at   | <i>Hr</i>                                    | hairless                                                                     | 1.95 |
| 1454650_at   | <i>Trim35</i>                                | tripartite motif-containing 35                                               | 1.95 |
| 1437479_x_at | <i>Tbx3</i>                                  | T-box 3                                                                      | 1.95 |
| 1441356_at   | <i>Shc2</i>                                  | src homology 2 domain-containing transforming protein C2                     | 1.95 |
| 1418107_at   | <i>Tcea2</i>                                 | transcription elongation factor A (SII), 2                                   | 1.95 |
| 1453001_at   | <i>Dleu8</i>                                 | deleted in lymphocytic leukemia 8                                            | 1.94 |
| 1459878_a_at | <i>A430107O13Rik</i>                         | RIKEN cDNA A430107O13 gene                                                   | 1.94 |
| 1426628_at   | <i>Tmem34</i>                                | transmembrane protein 34                                                     | 1.94 |
| 1434725_at   | <i>Gramd1c</i>                               | GRAM domain containing 1C                                                    | 1.94 |
| 1435977_at   | <i>Hdgfrp3</i>                               | hepatoma-derived growth factor, related protein 3                            | 1.94 |
| 1426449_a_at | <i>Pja1</i>                                  | praja1, RING-H2 motif containing                                             | 1.94 |
| 1449141_at   | <i>Fblim1</i>                                | filamin binding LIM protein 1                                                | 1.94 |
| 1436768_x_at | <i>E130112L23Rik</i> ///<br><i>LOC671456</i> | RIKEN cDNA E130112L23 gene /// similar to quattro                            | 1.93 |
| 1435133_at   | <i>Ugcg</i>                                  | UDP-glucose ceramide glucosyltransferase                                     | 1.93 |
| 1450158_at   | <i>Rem1</i>                                  | rad and gem related GTP binding protein 1                                    | 1.93 |
| 1450062_a_at | <i>Maged1</i>                                | melanoma antigen, family D, 1                                                | 1.93 |
| 1455943_at   | <i>Zfp451</i>                                | zinc finger protein 451                                                      | 1.93 |
| 1434436_at   | <i>Morc4</i>                                 | microorchidia 4                                                              | 1.93 |
| 1434465_x_at | <i>Vldlr</i>                                 | very low density lipoprotein receptor                                        | 1.93 |
| 1460718_s_at | <i>Mtch1</i>                                 | mitochondrial carrier homolog 1 (C. elegans)                                 | 1.93 |
| 1442325_at   | <i>Tbc1d24</i>                               | TBC1 domain family, member 24                                                | 1.93 |
| 1452958_at   | <i>Asphd2</i>                                | aspartate beta-hydroxylase domain containing 2                               | 1.93 |
| 1452770_at   | <i>Vkorc1</i>                                | vitamin K epoxide reductase complex, subunit 1                               | 1.93 |
| 1428329_a_at | <i>lft80</i>                                 | intraflagellar transport 80 homolog (Chlamydomonas)                          | 1.93 |

|              |                                      |                                                                          |      |
|--------------|--------------------------------------|--------------------------------------------------------------------------|------|
| 1422637_at   | <i>Rassf5</i>                        | Ras association (RalGDS/AF-6) domain family 5                            | 1.93 |
| 1452020_a_at | <i>Siva</i>                          | Cd27 binding protein (Hindu God of destruction)                          | 1.93 |
| 1429621_at   | <i>Cand2</i>                         | cullin-associated and neddylation-dissociated 2 (putative)               | 1.93 |
| 1455717_s_at | <i>Daam2</i>                         | dishevelled associated activator of morphogenesis 2                      | 1.92 |
| 1433671_at   | <i>A130022J15Rik</i>                 | RIKEN cDNA A130022J15 gene                                               | 1.92 |
| 1451156_s_at | <i>Vldlr</i>                         | very low density lipoprotein receptor                                    | 1.92 |
| 1438666_at   | <i>Ldlrad3</i>                       | low density lipoprotein receptor class A domain containing 3             | 1.92 |
| 1423126_at   | <i>Atp1b3</i>                        | ATPase, Na <sup>+</sup> /K <sup>+</sup> transporting, beta 3 polypeptide | 1.92 |
| 1425788_a_at | <i>Echdc2</i>                        | enoyl Coenzyme A hydratase domain containing 2                           | 1.91 |
| 1436383_at   | <i>Cplx2</i>                         | complexin 2                                                              | 1.91 |
| 1418109_at   | <i>Gspt2</i>                         | G1 to S phase transition 2                                               | 1.91 |
| 1428850_x_at | <i>Cd99</i>                          | CD99 antigen                                                             | 1.91 |
| 1426965_at   | <i>Rap2a</i>                         | RAS related protein 2a                                                   | 1.91 |
| 1428803_at   | <i>4632408A20Rik</i>                 | RIKEN cDNA 4632408A20 gene                                               | 1.91 |
| 1423689_a_at | <i>Gpsm1</i>                         | G-protein signalling modulator 1 (AGS3-like, <i>C. elegans</i> )         | 1.91 |
| 1438728_at   | <i>Nif3l1</i>                        | Ngg1 interacting factor 3-like 1 ( <i>S. pombe</i> )                     | 1.91 |
| 1425814_a_at | <i>Calclrl</i>                       | calcitonin receptor-like                                                 | 1.91 |
| 1433642_at   | <i>Arl15</i>                         | ADP-ribosylation factor-like 15                                          | 1.91 |
| 1427962_at   | <i>Ccdc102a</i> /// <i>LOC672218</i> | coiled-coil domain containing 102A /// similar to CG31638-PA             | 1.90 |
| 1421063_s_at | <i>Snrpn</i> /// <i>Snurf</i>        | small nuclear ribonucleoprotein N /// SNRPN upstream reading frame       | 1.90 |
| 1422982_at   | <i>Ar</i>                            | androgen receptor                                                        | 1.90 |
| 1457635_s_at | <i>Nr3c1</i>                         | nuclear receptor subfamily 3, group C, member 1                          | 1.90 |
| 1426973_at   | <i>Gpr153</i>                        | G protein-coupled receptor 153                                           | 1.90 |
| 1450172_at   | <i>Pknox1</i>                        | Pbx/knotted 1 homeobox                                                   | 1.90 |
| 1424634_at   | <i>Tceal1</i>                        | transcription elongation factor A (SII)-like 1                           | 1.90 |
| 1423801_a_at | <i>Aprt</i>                          | adenine phosphoribosyl transferase                                       | 1.90 |
| 1425822_a_at | <i>Dtx1</i>                          | deltex 1 homolog ( <i>Drosophila</i> )                                   | 1.89 |
| 1419212_at   | <i>Icosl</i>                         | icos ligand                                                              | 1.89 |
| 1420851_at   | <i>Pard6g</i>                        | par-6 partitioning defective 6 homolog gamma ( <i>C. elegans</i> )       | 1.89 |
| 1429684_at   | <i>5830472M02Rik</i>                 | RIKEN cDNA 5830472M02 gene                                               | 1.89 |
| 1452436_at   | <i>Loxl2</i>                         | lysyl oxidase-like 2                                                     | 1.89 |
| 1448823_at   | <i>Cxcl12</i>                        | chemokine (C-X-C motif) ligand 12                                        | 1.89 |
| 1427226_at   | <i>Epn2</i>                          | epsin 2                                                                  | 1.89 |
| 1435960_at   | <i>LOC434128</i>                     | Similar to KIAA1183 protein                                              | 1.89 |
| 1459873_x_at | <i>Maged2</i>                        | Melanoma antigen, family D, 2                                            | 1.88 |
| 1436195_at   | <i>BC046404</i>                      | cDNA sequence BC046404                                                   | 1.88 |
| 1416463_at   | <i>Gpiap1</i>                        | GPI-anchored membrane protein 1                                          | 1.88 |
| 1426751_s_at | <i>Nup107</i>                        | nucleoporin 107                                                          | 1.88 |
| 1448943_at   | <i>Nrp1</i>                          | neuropilin 1                                                             | 1.87 |



|              |                                           |                                                                                                                                                                                                               |      |
|--------------|-------------------------------------------|---------------------------------------------------------------------------------------------------------------------------------------------------------------------------------------------------------------|------|
| 1417230_at   | <i>Ralgps2</i>                            | Ral GEF with PH domain and SH3 binding motif 2                                                                                                                                                                | 1.87 |
| 1421825_at   | <i>Bace1</i>                              | beta-site APP cleaving enzyme 1                                                                                                                                                                               | 1.87 |
| 1426517_at   | <i>Gnaz</i>                               | guanine nucleotide binding protein, alpha z subunit                                                                                                                                                           | 1.87 |
| 1416514_a_at | <i>Fscn1</i>                              | fascin homolog 1, actin bundling protein (Strongylocentrotus purpuratus)                                                                                                                                      | 1.87 |
| 1454678_s_at | <i>A130022J15Rik</i>                      | RIKEN cDNA A130022J15 gene                                                                                                                                                                                    | 1.87 |
| 1433912_at   | <i>Tipr1</i>                              | TIP41, TOR signalling pathway regulator-like (S. cerevisiae)                                                                                                                                                  | 1.87 |
| 1418884_x_at | <i>Tuba1</i>                              | tubulin, alpha 1                                                                                                                                                                                              | 1.86 |
| 1417730_at   | <i>Ext1</i>                               | exostoses (multiple) 1                                                                                                                                                                                        | 1.86 |
| 1444998_at   | ---                                       | Transcribed locus                                                                                                                                                                                             | 1.86 |
| 1448944_at   | <i>Nrp1</i>                               | neuropilin 1                                                                                                                                                                                                  | 1.86 |
| 1426453_at   | <i>Pitrm1</i>                             | pitrilysin metallepetidase 1                                                                                                                                                                                  | 1.85 |
| 1434075_at   | <i>BC030336</i>                           | cDNA sequence BC030336                                                                                                                                                                                        | 1.85 |
| 1431890_a_at | <i>Mllt3</i>                              | myeloid/lymphoid or mixed lineage-leukemia translocation to 3 homolog (Drosophila)                                                                                                                            | 1.85 |
| 1434376_at   | <i>Cd44</i>                               | CD44 antigen                                                                                                                                                                                                  | 1.85 |
| 1424426_at   | <i>Mtap</i>                               | methylthioadenosine phosphorylase                                                                                                                                                                             | 1.85 |
| 1434780_at   | <i>C130038G02Rik</i>                      | RIKEN cDNA C130038G02 gene                                                                                                                                                                                    | 1.85 |
| 1436937_at   | <i>Rbms3</i>                              | RNA binding motif, single stranded interacting protein                                                                                                                                                        | 1.85 |
| 1434571_at   | <i>Vps13b</i> /// LOC666173 /// LOC669978 | vacuolar protein sorting 13B (yeast) /// similar to vacuolar protein sorting 13B isoform 4 /// region containing RIKEN cDNA C330002D13 gene; RIKEN cDNA 2310042E16 gene; vacuolar protein sorting 13B (yeast) | 1.85 |
| 1449443_at   | <i>Decr1</i>                              | 2,4-dienoyl CoA reductase 1, mitochondrial                                                                                                                                                                    | 1.85 |
| 1435672_at   | <i>3830612M24</i>                         | hypothetical protein 3830612M24                                                                                                                                                                               | 1.85 |
| 1424987_at   | <i>5430435G22Rik</i>                      | RIKEN cDNA 5430435G22 gene                                                                                                                                                                                    | 1.85 |
| 1429714_at   | <i>Sumf2</i>                              | sulfatase modifying factor 2                                                                                                                                                                                  | 1.85 |
| 1420509_at   | <i>Srfbp1</i>                             | serum response factor binding protein 1                                                                                                                                                                       | 1.85 |
| 1424099_at   | <i>2310016C16Rik</i>                      | RIKEN cDNA 2310016C16 gene                                                                                                                                                                                    | 1.84 |
| 1439014_at   | <i>1600021P15Rik</i>                      | RIKEN cDNA 1600021P15 gene                                                                                                                                                                                    | 1.84 |
| 1456830_at   | <i>Ppp1r2</i>                             | protein phosphatase 1, regulatory (inhibitor) subunit 2                                                                                                                                                       | 1.84 |
| 1420679_a_at | <i>Aig1</i>                               | androgen-induced 1                                                                                                                                                                                            | 1.84 |
| 1440827_x_at | <i>Sox5</i>                               | SRY-box containing gene 5                                                                                                                                                                                     | 1.84 |
| 1421891_at   | <i>St3gal2</i>                            | ST3 beta-galactoside alpha-2,3-sialyltransferase 2                                                                                                                                                            | 1.84 |
| 1450417_a_at | <i>Rps20</i> /// LOC245676 /// LOC623568  | ribosomal protein S20 /// similar to 40S ribosomal protein S20 /// similar to 40S ribosomal protein S20                                                                                                       | 1.84 |
| 1428955_x_at | <i>Slc9a3r2</i>                           | solute carrier family 9 (sodium/hydrogen exchanger), isoform 3 regulator 2                                                                                                                                    | 1.84 |
| 1417978_at   | <i>Eif4e3</i>                             | eukaryotic translation initiation factor 4E member 3                                                                                                                                                          | 1.83 |
| 1427289_at   | <i>Ddhd1</i>                              | DDHD domain containing 1                                                                                                                                                                                      | 1.83 |

|              |                                                                      |                                                                                                            |      |
|--------------|----------------------------------------------------------------------|------------------------------------------------------------------------------------------------------------|------|
| 1417977_at   | <i>Eif4e3</i>                                                        | eukaryotic translation initiation factor 4E member 3                                                       | 1.83 |
| 1450904_at   | <i>Tmem167</i>                                                       | transmembrane protein 167                                                                                  | 1.83 |
| 1420666_at   | <i>Doc2b</i>                                                         | double C2, beta                                                                                            | 1.83 |
| 1424015_at   | <i>Rab6ip1</i>                                                       | Rab6 interacting protein 1                                                                                 | 1.83 |
| 1428470_at   | <i>Exoc2</i>                                                         | exocyst complex component 2                                                                                | 1.83 |
| 1454934_at   | <i>Ppm1f</i>                                                         | protein phosphatase 1F (PP2C domain containing)                                                            | 1.82 |
| 1445027_at   | <i>Cdr2l</i>                                                         | cerebellar degeneration-related protein 2-like                                                             | 1.82 |
| 1454884_at   | <i>Btbd4</i>                                                         | BTB (POZ) domain containing 4                                                                              | 1.82 |
| 1455562_at   | <i>Sox12</i>                                                         | SRY-box containing gene 12                                                                                 | 1.82 |
| 1437849_x_at | <i>Armcx2</i>                                                        | armadillo repeat containing, X-linked 2                                                                    | 1.82 |
| 1437213_at   | <i>Nudt21</i>                                                        | nudix (nucleoside diphosphate linked moiety X)-type motif 21                                               | 1.82 |
| 1426680_at   | <i>Sepr1</i>                                                         | selenoprotein N, 1                                                                                         | 1.82 |
| 1416868_at   | <i>Cdkn2c</i>                                                        | cyclin-dependent kinase inhibitor 2C (p18, inhibits CDK4)                                                  | 1.81 |
| 1453200_at   | <i>Rai1</i>                                                          | retinoic acid induced 1                                                                                    | 1.81 |
| 1428881_at   | <i>Kns2</i>                                                          | kinesin 2                                                                                                  | 1.81 |
| 1437550_at   | <i>Dhx36</i>                                                         | DEAH (Asp-Glu-Ala-His) box polypeptide 36                                                                  | 1.81 |
| 1419255_at   | <i>Spnb2</i>                                                         | spectrin beta 2                                                                                            | 1.81 |
| 1455672_s_at | <i>Cplx2</i>                                                         | complexin 2                                                                                                | 1.81 |
| 1419033_at   | ---                                                                  | ---                                                                                                        | 1.81 |
| 1417612_at   | <i>Ier5</i>                                                          | immediate early response 5                                                                                 | 1.81 |
| 1419415_a_at | <i>Rarg</i>                                                          | retinoic acid receptor, gamma                                                                              | 1.81 |
| 1424872_at   | <i>2310001H12Rik</i> ///<br><i>LOC636362</i> ///<br><i>LOC666849</i> | RIKEN cDNA 2310001H12 gene /// similar to zinc finger protein 709 /// similar to zinc finger protein 665   | 1.81 |
| 1459888_at   | <i>LOC545261</i>                                                     | hypothetical protein LOC545261                                                                             | 1.81 |
| 1434905_at   | <i>BC064011</i>                                                      | cDNA sequence BC064011                                                                                     | 1.81 |
| 1429148_at   | <i>Nfic</i>                                                          | nuclear factor I/C                                                                                         | 1.80 |
| 1416209_at   | <i>Glud1</i>                                                         | glutamate dehydrogenase 1                                                                                  | 1.80 |
| 1421870_at   | <i>Trim44</i>                                                        | tripartite motif-containing 44                                                                             | 1.80 |
| 1415923_at   | <i>Ndn</i>                                                           | neccdin                                                                                                    | 1.80 |
| 1428499_at   | <i>2810454L23Rik</i>                                                 | RIKEN cDNA 2810454L23 gene                                                                                 | 1.80 |
| 1426483_at   | <i>Prkrir</i>                                                        | protein-kinase, interferon-inducible double stranded RNA dependent inhibitor, repressor of (P58 repressor) | 1.80 |
| 1459911_at   | <i>Cdr2l</i>                                                         | cerebellar degeneration-related protein 2-like                                                             | 1.80 |
| 1434775_at   | <i>Pard3</i>                                                         | par-3 (partitioning defective 3) homolog (C. elegans)                                                      | 1.79 |
| 1422587_at   | <i>Tmem45a</i>                                                       | transmembrane protein 45a                                                                                  | 1.79 |
| 1418098_at   | <i>Adcy4</i>                                                         | adenylate cyclase 4                                                                                        | 1.79 |
| 1418967_a_at | <i>St7</i>                                                           | Suppression of tumorigenicity 7                                                                            | 1.79 |
| 1416865_at   | <i>Fgd1</i>                                                          | FYVE, RhoGEF and PH domain containing 1                                                                    | 1.79 |
| 1455966_s_at | <i>Nudt21</i>                                                        | nudix (nucleoside diphosphate linked moiety X)-type motif 21                                               | 1.79 |
| 1460356_at   | <i>Esam1</i>                                                         | endothelial cell-specific adhesion molecule                                                                | 1.79 |

|              |                            |                                                                                    |      |
|--------------|----------------------------|------------------------------------------------------------------------------------|------|
| 1441870_s_at | <i>Pkd2</i>                | polycystic kidney disease 2                                                        | 1.79 |
| 1427048_at   | <i>Smo</i>                 | smoothened homolog (Drosophila)                                                    | 1.79 |
| 1452347_at   | <i>Mef2a</i>               | myocyte enhancer factor 2A                                                         | 1.79 |
| 1456859_at   | <i>Lnp</i>                 | limb and neural patterns                                                           | 1.78 |
| 1415852_at   | <i>Impdh2</i>              | inosine 5'-phosphate dehydrogenase 2                                               | 1.78 |
| 1436836_x_at | <i>Cnn3</i>                | calponin 3, acidic                                                                 | 1.78 |
| 1456733_x_at | <i>Serpinh1</i>            | serine (or cysteine) peptidase inhibitor, clade H, member 1                        | 1.78 |
| 1434703_at   | <i>Extl3</i>               | exostoses (multiple)-like 3                                                        | 1.78 |
| 1423554_at   | <i>Ggcx</i>                | gamma-glutamyl carboxylase                                                         | 1.78 |
| 1449410_a_at | <i>Gas5</i>                | growth arrest specific 5                                                           | 1.78 |
| 1449921_s_at | <i>Cpne6</i>               | copine VI                                                                          | 1.78 |
| 1424460_s_at | <i>Aylt2</i>               | acyltransferase like 2                                                             | 1.78 |
| 1427103_at   | <i>Plekhq1</i>             | pleckstrin homology domain containing, family Q member 1                           | 1.77 |
| 1422624_at   | <i>Rev1l</i>               | REV1-like ( <i>S. cerevisiae</i> )                                                 | 1.77 |
| 1418003_at   | <i>1190002H23Rik</i>       | RIKEN cDNA 1190002H23 gene                                                         | 1.77 |
| 1420944_at   | <i>Zfp185</i>              | zinc finger protein 185                                                            | 1.77 |
| 1417400_at   | <i>Rai14</i>               | retinoic acid induced 14                                                           | 1.77 |
| 1456022_at   | <i>Hipk2</i>               | homeodomain interacting protein kinase 2                                           | 1.77 |
| 1427232_at   | <i>Tshz1</i>               | teashirt zinc finger family member 1                                               | 1.77 |
| 1417166_at   | <i>Psip1</i>               | PC4 and SFRS1 interacting protein 1                                                | 1.77 |
| 1439369_x_at | <i>Slc9a3r2</i>            | solute carrier family 9 (sodium/hydrogen exchanger), isoform 3 regulator 2         | 1.77 |
| 1451346_at   | <i>Mtap</i>                | methylthioadenosine phosphorylase                                                  | 1.76 |
| 1447567_at   | <i>D130007H15Rik</i>       | RIKEN cDNA D130007H15 gene                                                         | 1.76 |
| 1434148_at   | <i>Tcf4</i>                | transcription factor 4                                                             | 1.76 |
| 1419256_at   | <i>Spnb2</i>               | spectrin beta 2                                                                    | 1.76 |
| 1424074_at   | <i>Btf3l4</i>              | basic transcription factor 3-like 4                                                | 1.76 |
| 1422541_at   | <i>Ptprm</i>               | protein tyrosine phosphatase, receptor type, M                                     | 1.76 |
| 1419379_x_at | <i>Fxyd2</i>               | FXYD domain-containing ion transport regulator 2                                   | 1.76 |
| 1424772_at   | <i>H2afj</i> /// LOC632401 | H2A histone family, member J /// similar to H2A histone family, member J isoform 2 | 1.76 |
| 1426887_at   | <i>Nudt11</i>              | nudix (nucleoside diphosphate linked moiety X)-type motif 11                       | 1.76 |
| 1415774_at   | <i>Statip1</i>             | signal transducer and activator of transcription interacting protein 1             | 1.76 |
| 1456723_at   | <i>Prr14</i>               | Proline rich 14                                                                    | 1.76 |
| 1448432_at   | <i>Plcd1</i>               | phospholipase C, delta 1                                                           | 1.76 |
| 1430516_at   | <i>4930428B01Rik</i>       | RIKEN cDNA 4930428B01 gene                                                         | 1.76 |
| 1418446_at   | <i>Slc16a2</i>             | solute carrier family 16 (monocarboxylic acid transporters), member 2              | 1.76 |
| 1434961_at   | <i>Asb1</i>                | ankyrin repeat and SOCS box-containing protein 1                                   | 1.76 |
| 1425080_at   | <i>Zfp286</i>              | zinc finger protein 286                                                            | 1.76 |
| 1431602_a_at | <i>Ugcgl2</i>              | UDP-glucose ceramide glucosyltransferase-like 2                                    | 1.76 |
| 1448259_at   | <i>Fstl1</i>               | follistatin-like 1                                                                 | 1.76 |
| 1427006_at   | <i>Rapgef1</i>             | Rap guanine nucleotide exchange factor (GEF) 1                                     | 1.76 |

|              |                      |                                                                                  |      |
|--------------|----------------------|----------------------------------------------------------------------------------|------|
| 1447804_x_at | <i>BC031781</i>      | CDNA sequence BC031781                                                           | 1.76 |
| 1416723_at   | <i>Tcf4</i>          | transcription factor 4                                                           | 1.76 |
| 1440999_at   | <i>Zfp697</i>        | zinc finger protein 697                                                          | 1.75 |
| 1419207_at   | <i>Zfp37</i>         | zinc finger protein 37                                                           | 1.75 |
| 1423745_at   | <i>1110031B06Rik</i> | RIKEN cDNA 1110031B06 gene                                                       | 1.75 |
| 1435260_at   | ---                  | ---                                                                              | 1.75 |
| 1449351_s_at | <i>Pdgfc</i>         | platelet-derived growth factor, C polypeptide                                    | 1.75 |
| 1454878_at   | <i>2310047C04Rik</i> | RIKEN cDNA 2310047C04 gene                                                       | 1.75 |
| 1436830_at   | <i>Marveld1</i>      | MARVEL (membrane-associating) domain containing 1                                | 1.75 |
| 1435301_at   | <i>1110004E09Rik</i> | RIKEN cDNA 1110004E09 gene                                                       | 1.75 |
| 1428401_at   | <i>Zcchc3</i>        | zinc finger, CCHC domain containing 3                                            | 1.75 |
| 1435505_at   | <i>Dmwd</i>          | dystrophia myotonica-containing WD repeat motif                                  | 1.74 |
| 1454732_at   | <i>Mtap1s</i>        | microtubule-associated protein 1S                                                | 1.74 |
| 1431832_x_at | <i>Exosc10</i>       | exosome component 10                                                             | 1.74 |
| 1433883_at   | <i>Tpm4</i>          | tropomyosin 4                                                                    | 1.74 |
| 1453128_at   | <i>Xlkd1</i>         | extra cellular link domain-containing 1                                          | 1.74 |
| 1420638_at   | <i>Prps2</i>         | phosphoribosyl pyrophosphate synthetase 2                                        | 1.74 |
| 1419123_a_at | <i>Pdgfc</i>         | platelet-derived growth factor, C polypeptide                                    | 1.74 |
| 1417879_at   | <i>Nenf</i>          | neuron derived neurotrophic factor                                               | 1.73 |
| 1460210_at   | <i>Pkd1</i>          | polycystic kidney disease 1 homolog                                              | 1.73 |
| 1426235_a_at | <i>Glul</i>          | glutamate-ammonia ligase (glutamine synthetase)                                  | 1.73 |
| 1426297_at   | <i>Tcf2a</i>         | transcription factor E2a                                                         | 1.73 |
| 1421986_at   | <i>Eif4e2</i>        | eukaryotic translation initiation factor 4E member 2                             | 1.73 |
| 1434469_at   | <i>Otud4</i>         | OTU domain containing 4                                                          | 1.73 |
| 1451604_a_at | <i>Acvr11</i>        | activin A receptor, type II-like 1                                               | 1.73 |
| 1460553_at   | <i>1700025K23Rik</i> | RIKEN cDNA 1700025K23 gene                                                       | 1.72 |
| 1443881_at   | <i>Pofut1</i>        | protein O-fucosyltransferase 1                                                   | 1.72 |
| 1423297_at   | <i>Add3</i>          | adducin 3 (gamma)                                                                | 1.72 |
| 1435092_at   | <i>Arl4a</i>         | ADP-ribosylation factor-like 4A                                                  | 1.72 |
| 1433694_at   | <i>Pde3b</i>         | phosphodiesterase 3B, cGMP-inhibited                                             | 1.72 |
| 1437480_at   | ---                  | ---                                                                              | 1.72 |
| 1437212_at   | <i>B230312118Rik</i> | RIKEN cDNA B230312118 gene                                                       | 1.72 |
| 1428457_at   | <i>5830472M02Rik</i> | RIKEN cDNA 5830472M02 gene                                                       | 1.71 |
| 1436161_at   | <i>Aprin</i>         | androgen-induced proliferation inhibitor                                         | 1.71 |
| 1416724_x_at | <i>Tcf4</i>          | transcription factor 4                                                           | 1.71 |
| 1422680_at   | <i>Ctr9</i>          | Ctr9, Paf1/RNA polymerase II complex component, homolog ( <i>S. cerevisiae</i> ) | 1.71 |
| 1451476_at   | <i>Zdhhc8</i>        | zinc finger, DHHC domain containing 8                                            | 1.71 |
| 1454628_at   | <i>A930037G23Rik</i> | RIKEN cDNA A930037G23 gene                                                       | 1.71 |
| 1455315_at   | <i>Trp53i13</i>      | tumor protein p53 inducible protein 13                                           | 1.71 |
| 1422449_s_at | <i>Rcn2</i>          | reticulocalbin 2                                                                 | 1.71 |
| 1454021_a_at | <i>Exosc10</i>       | exosome component 10                                                             | 1.71 |
| 1436234_at   | <i>4732471D19Rik</i> | RIKEN cDNA 4732471D19 gene                                                       | 1.71 |
| 1428098_a_at | <i>Tm7sf3</i>        | transmembrane 7 superfamily member 3                                             | 1.71 |
| 1425913_a_at | <i>2810022L02Rik</i> | RIKEN cDNA 2810022L02 gene                                                       | 1.71 |

|              |                      |                                                                                               |      |
|--------------|----------------------|-----------------------------------------------------------------------------------------------|------|
| 1439808_at   | <i>A130090K04Rik</i> | RIKEN cDNA A130090K04 gene                                                                    | 1.71 |
| 1438861_at   | <i>Bnc2</i>          | basonuclin 2                                                                                  | 1.70 |
| 1415790_at   | <i>Ublcp1</i>        | ubiquitin-like domain containing CTD phosphatase 1                                            | 1.70 |
| 1429192_at   | <i>Ski</i>           | Sloan-Kettering viral oncogene homolog                                                        | 1.70 |
| 1454729_at   | <i>Tmem108</i>       | transmembrane protein 108                                                                     | 1.70 |
| 1419265_at   | <i>1200014M14Rik</i> | RIKEN cDNA 1200014M14 gene                                                                    | 1.70 |
| 1436978_at   | <i>Wnt9a</i>         | wingless-type MMTV integration site 9A                                                        | 1.70 |
| 1435299_at   | <i>C230069N13</i>    | hypothetical protein C230069N13                                                               | 1.70 |
| 1437785_at   | <i>Adamts9</i>       | a disintegrin-like and metallopeptidase (reprolysin type) with thrombospondin type 1 motif, 9 | 1.70 |
| 1428325_at   | <i>2610019P18Rik</i> | RIKEN cDNA 2610019P18 gene                                                                    | 1.70 |
| 1427985_at   | <i>9630042H07Rik</i> | RIKEN cDNA 9630042H07 gene                                                                    | 1.70 |
| 1427486_at   | <i>Ptprb</i>         | protein tyrosine phosphatase, receptor type, B                                                | 1.70 |
| 1429027_at   | <i>0610007N19Rik</i> | RIKEN cDNA 0610007N19 gene                                                                    | 1.70 |
| 1460403_at   | <i>Psip1</i>         | PC4 and SFRS1 interacting protein 1                                                           | 1.70 |
| 1424183_at   | <i>Acat1</i>         | acetyl-Coenzyme A acetyltransferase 1                                                         | 1.70 |
| 1422245_a_at | <i>Mrv1</i>          | MRV integration site 1                                                                        | 1.69 |
| 1449283_a_at | <i>Mapk12</i>        | mitogen-activated protein kinase 12                                                           | 1.69 |
| 1456721_at   | <i>Gm837</i>         | gene model 837, (NCBI)                                                                        | 1.69 |
| 1434515_at   | <i>Ncoa1</i>         | nuclear receptor coactivator 1                                                                | 1.69 |
| 1424533_a_at | <i>3110023B02Rik</i> | RIKEN cDNA 3110023B02 gene                                                                    | 1.69 |
| 1418049_at   | <i>Ltbp3</i>         | latent transforming growth factor beta binding protein 3                                      | 1.69 |
| 1456739_x_at | <i>Armxc2</i>        | armadillo repeat containing, X-linked 2                                                       | 1.69 |
| 1443920_at   | <i>Ccdc66</i>        | coiled-coil domain containing 66                                                              | 1.69 |
| 1435157_at   | <i>5830454D03Rik</i> | RIKEN cDNA 5830454D03 gene                                                                    | 1.69 |
| 1429760_at   | <i>Rps6ka6</i>       | ribosomal protein S6 kinase polypeptide 6                                                     | 1.69 |
| 1426492_at   | <i>Tdp1</i>          | tyrosyl-DNA phosphodiesterase 1                                                               | 1.69 |
| 1428875_at   | <i>Golph4</i>        | golgi phosphoprotein 4                                                                        | 1.68 |
| 1420859_at   | <i>Pkia</i>          | protein kinase inhibitor, alpha                                                               | 1.68 |
| 1449298_a_at | <i>Pde1a</i>         | phosphodiesterase 1A, calmodulin-dependent                                                    | 1.68 |
| 1438693_at   | <i>Tmem110</i>       | transmembrane protein 110                                                                     | 1.68 |
| 1438556_a_at | <i>Tmod3</i>         | tropomodulin 3                                                                                | 1.68 |
| 1434643_at   | <i>Tbl1x</i>         | transducin (beta)-like 1 X-linked                                                             | 1.68 |
| 1435457_at   | <i>Pdzd4</i>         | PDZ domain containing 4                                                                       | 1.68 |
| 1434468_at   | <i>Otud4</i>         | OTU domain containing 4                                                                       | 1.68 |
| 1434348_at   | <i>Fez2</i>          | fasciculation and elongation protein zeta 2 (zygin II)                                        | 1.68 |
| 1457094_at   | <i>She</i>           | src homology 2 domain-containing transforming protein E                                       | 1.67 |
| 1450420_at   | <i>Stag1</i>         | stromal antigen 1                                                                             | 1.67 |
| 1439481_at   | <i>Ipo9</i>          | importin 9                                                                                    | 1.67 |
| 1428797_at   | <i>0610039J04Rik</i> | RIKEN cDNA 0610039J04 gene                                                                    | 1.67 |
| 1416755_at   | <i>Dnajb1</i>        | DnaJ (Hsp40) homolog, subfamily B, member 1                                                   | 1.67 |
| 1454726_s_at | <i>AW456874</i>      | expressed sequence AW456874                                                                   | 1.67 |
| 1428016_a_at | <i>Rasip1</i>        | Ras interacting protein 1                                                                     | 1.67 |
| 1455409_at   | <i>Spire1</i>        | spire homolog 1 (Drosophila)                                                                  | 1.67 |

|              |                                  |                                                                                                                                       |      |
|--------------|----------------------------------|---------------------------------------------------------------------------------------------------------------------------------------|------|
| 1452628_at   | <i>Bag5</i>                      | BCL2-associated athanogene 5                                                                                                          | 1.67 |
| 1451540_at   | <i>Mpi1</i>                      | mannose phosphate isomerase 1                                                                                                         | 1.67 |
| 1436957_at   | <i>Gabra3</i>                    | Gamma-aminobutyric acid (GABA-A) receptor, subunit alpha 3                                                                            | 1.67 |
| 1431424_at   | <i>2810055G20Rik</i>             | RIKEN cDNA 2810055G20 gene                                                                                                            | 1.67 |
| 1437511_x_at | <i>Clcc1</i>                     | chloride channel CLIC-like 1                                                                                                          | 1.67 |
| 1421500_at   | <i>Sts</i>                       | steroid sulfatase                                                                                                                     | 1.67 |
| 1455303_at   | ---                              | ---                                                                                                                                   | 1.67 |
| 1451277_at   | <i>Zadh2</i>                     | zinc binding alcohol dehydrogenase, domain containing 2                                                                               | 1.67 |
| 1421354_at   | <i>Prkg2</i>                     | protein kinase, cGMP-dependent, type II                                                                                               | 1.67 |
| 1418926_at   | <i>Zfx1a</i>                     | zinc finger homeobox 1a                                                                                                               | 1.67 |
| 1452604_at   | <i>Stard13</i>                   | serologically defined colon cancer antigen 13                                                                                         | 1.67 |
| 1455945_at   | <i>A530094I17Rik</i>             | RIKEN cDNA A530094I17 gene                                                                                                            | 1.66 |
| 1434857_at   | <i>A230106D06Rik</i>             | RIKEN cDNA A230106D06 gene                                                                                                            | 1.66 |
| 1420388_at   | <i>Prss12</i>                    | protease, serine, 12 neurotrypsin (motopsin)                                                                                          | 1.66 |
| 1458202_at   | <i>6330500D04Rik</i>             | RIKEN cDNA 6330500D04 gene                                                                                                            | 1.66 |
| 1460443_at   | <i>Brms1l</i>                    | breast cancer metastasis-suppressor 1-like                                                                                            | 1.66 |
| 1421129_a_at | <i>Atp2a3</i>                    | ATPase, Ca <sup>++</sup> transporting, ubiquitous                                                                                     | 1.66 |
| 1424633_at   | <i>Camk1g</i>                    | calcium/calmodulin-dependent protein kinase I gamma                                                                                   | 1.66 |
| 1428287_at   | <i>Cul5</i>                      | cullin 5                                                                                                                              | 1.66 |
| 1428339_at   | <i>Nudt21</i>                    | nudix (nucleoside diphosphate linked moiety X)-type motif 21                                                                          | 1.66 |
| 1423311_s_at | <i>Tpbp</i>                      | trophoblast glycoprotein                                                                                                              | 1.66 |
| 1415911_at   | <i>Impact</i>                    | imprinted and ancient                                                                                                                 | 1.66 |
| 1435242_at   | <i>Aprin</i>                     | androgen-induced proliferation inhibitor                                                                                              | 1.66 |
| 1433973_at   | <i>Sephs1</i>                    | selenophosphate synthetase 1                                                                                                          | 1.66 |
| 1425472_a_at | <i>Lmna</i>                      | lamin A                                                                                                                               | 1.66 |
| 1455795_at   | <i>Sart2</i>                     | squamous cell carcinoma antigen recognized by T cells 2                                                                               | 1.66 |
| 1451010_at   | <i>Nol11</i>                     | nucleolar protein 11                                                                                                                  | 1.65 |
| 1425458_a_at | <i>Grb10</i>                     | growth factor receptor bound protein 10                                                                                               | 1.65 |
| 1434563_at   | <i>Rps6kc1</i>                   | ribosomal protein S6 kinase polypeptide 1                                                                                             | 1.65 |
| 1456597_at   | <i>Heatr3</i>                    | HEAT repeat containing 3                                                                                                              | 1.65 |
| 1421892_at   | ---                              | ---                                                                                                                                   | 1.65 |
| 1429491_s_at | <i>Rif1</i> /// <i>LOC671598</i> | Rap1 interacting factor 1 homolog (yeast) /// similar to Telomere-associated protein RIF1 (Rap1-interacting factor 1 homolog) (mRif1) | 1.65 |
| 1437449_at   | <i>Rsad1</i>                     | radical S-adenosyl methionine domain containing 1                                                                                     | 1.65 |
| 1416536_at   | <i>Mum1</i>                      | melanoma associated antigen (mutated) 1                                                                                               | 1.65 |
| 1429368_at   | <i>Lrig3</i>                     | leucine-rich repeats and immunoglobulin-like domains 3                                                                                | 1.65 |
| 1452464_a_at | <i>Metap1l</i>                   | methionine aminopeptidase-like 1                                                                                                      | 1.65 |
| 1460215_at   | <i>Rpo1-4</i>                    | RNA polymerase 1-4                                                                                                                    | 1.65 |
| 1433644_at   | <i>Pomt2</i>                     | protein-O-mannosyltransferase 2                                                                                                       | 1.64 |
| 1416009_at   | <i>Tspan3</i>                    | tetraspanin 3                                                                                                                         | 1.64 |

|              |                             |                                                                                                                      |      |
|--------------|-----------------------------|----------------------------------------------------------------------------------------------------------------------|------|
| 1450647_at   | <i>Hps3</i>                 | Hermansky-Pudlak syndrome 3 homolog (human)                                                                          | 1.64 |
| 1447475_at   | <i>Gm967</i>                | gene model 967, (NCBI)                                                                                               | 1.64 |
| 1424761_at   | <i>BC011487</i>             | cDNA sequence BC011487                                                                                               | 1.64 |
| 1426625_at   | <i>Zfp623</i>               | zinc finger protein 623                                                                                              | 1.64 |
| 1418041_at   | <i>4432406C05Rik</i>        | RIKEN cDNA 4432406C05 gene                                                                                           | 1.64 |
| 1428744_s_at | <i>Bri3bp</i>               | Bri3 binding protein                                                                                                 | 1.64 |
| 1460550_at   | <i>Mtmr11</i>               | myotubularin related protein 11                                                                                      | 1.64 |
| 1452030_a_at | <i>Hnrpr</i>                | heterogeneous nuclear ribonucleoprotein R                                                                            | 1.64 |
| 1460549_a_at | <i>Cdc23</i>                | CDC23 (cell division cycle 23, yeast, homolog)                                                                       | 1.64 |
| 1453622_s_at | <i>Mllt3</i>                | myeloid/lymphoid or mixed lineage-leukemia translocation to 3 homolog (Drosophila)                                   | 1.64 |
| 1440187_at   | <i>Taf3</i>                 | TAF3 RNA polymerase II, TATA box binding protein (TBP)-associated factor                                             | 1.64 |
| 1415789_a_at | <i>Ublcp1 /// LOC665689</i> | ubiquitin-like domain containing CTD phosphatase 1 /// similar to ubiquitin-like domain containing CTD phosphatase 1 | 1.64 |
| 1434232_a_at | <i>2610030H06Rik</i>        | RIKEN cDNA 2610030H06 gene                                                                                           | 1.64 |
| 1425366_a_at | <i>Hus1</i>                 | Hus1 homolog (S. pombe)                                                                                              | 1.64 |
| 1417399_at   | <i>Gas6</i>                 | growth arrest specific 6                                                                                             | 1.63 |
| 1448029_at   | <i>Tbx3</i>                 | T-box 3                                                                                                              | 1.63 |
| 1419521_at   | <i>Zfp94</i>                | zinc finger protein 94                                                                                               | 1.63 |
| 1438790_x_at | <i>Tmem41b</i>              | transmembrane protein 41B                                                                                            | 1.63 |
| 1457440_at   | <i>Sstr4</i>                | somatostatin receptor 4                                                                                              | 1.63 |
| 1419291_x_at | <i>Gas5</i>                 | growth arrest specific 5                                                                                             | 1.63 |
| 1419573_a_at | <i>Lgals1</i>               | lectin, galactose binding, soluble 1                                                                                 | 1.63 |
| 1434960_at   | <i>Taf9b</i>                | TAF9B RNA polymerase II, TATA box binding protein (TBP)-associated factor                                            | 1.63 |
| 1422792_at   | <i>Pafah1b2</i>             | platelet-activating factor acetylhydrolase, isoform 1b, alpha2 subunit                                               | 1.63 |
| 1424284_at   | <i>Pomt1</i>                | protein-O-mannosyltransferase 1                                                                                      | 1.63 |
| 1426363_x_at | <i>H2afy2</i>               | H2A histone family, member Y2                                                                                        | 1.63 |
| 1426373_at   | <i>Ski</i>                  | Sloan-Kettering viral oncogene homolog                                                                               | 1.63 |
| 1424006_at   | <i>Aarsd1</i>               | alanyl-tRNA synthetase domain containing 1                                                                           | 1.63 |
| 1433915_s_at | <i>Epn2</i>                 | epsin 2                                                                                                              | 1.63 |
| 1451703_s_at | ---                         | ---                                                                                                                  | 1.63 |
| 1455757_at   | <i>D3Erttd254e</i>          | DNA segment, Chr 3, ERATO Doi 254, expressed                                                                         | 1.62 |
| 1435187_at   | <i>Tomm20</i>               | Translocase of outer mitochondrial membrane 20 homolog (yeast)                                                       | 1.62 |
| 1456763_at   | <i>AA536749</i>             | expressed sequence AA536749                                                                                          | 1.62 |
| 1428512_at   | <i>Bhlhb9</i>               | basic helix-loop-helix domain containing, class B9                                                                   | 1.62 |
| 1418840_at   | <i>Pdcd4 /// LOC670861</i>  | programmed cell death 4 /// similar to programmed cell death 4                                                       | 1.62 |
| 1452166_a_at | <i>Krt10</i>                | keratin 10                                                                                                           | 1.62 |
| 1455722_at   | ---                         | ---                                                                                                                  | 1.62 |
| 1418664_at   | <i>Mpdz</i>                 | multiple PDZ domain protein                                                                                          | 1.62 |
| 1457265_at   | <i>B230333C21Rik</i>        | RIKEN cDNA B230333C21 gene                                                                                           | 1.62 |

|              |                                  |                                                                                                                     |      |
|--------------|----------------------------------|---------------------------------------------------------------------------------------------------------------------|------|
| 1453183_at   | <i>1110034A24Rik</i>             | RIKEN cDNA 1110034A24 gene                                                                                          | 1.62 |
| 1451545_at   | <i>Tdrd3</i>                     | tudor domain containing 3                                                                                           | 1.62 |
| 1456098_a_at | <i>Elmo2</i>                     | engulfment and cell motility 2, ced-12 homolog (C. elegans)                                                         | 1.62 |
| 1452850_s_at | <i>Brms1l</i>                    | breast cancer metastasis-suppressor 1-like                                                                          | 1.62 |
| 1416767_a_at | <i>1110003E01Rik</i>             | RIKEN cDNA 1110003E01 gene                                                                                          | 1.62 |
| 1440466_at   | <i>BC003965</i>                  | cDNA sequence BC003965                                                                                              | 1.62 |
| 1418843_at   | <i>Slc30a4</i>                   | solute carrier family 30 (zinc transporter), member 4                                                               | 1.62 |
| 1432511_s_at | <i>Cep27</i>                     | centrosomal protein 27                                                                                              | 1.62 |
| 1449144_at   | <i>Gna11</i>                     | guanine nucleotide binding protein, alpha 11                                                                        | 1.61 |
| 1451130_at   | <i>2010315L10Rik</i>             | RIKEN cDNA 2010315L10 gene                                                                                          | 1.61 |
| 1424470_a_at | <i>Rapgef3</i>                   | Rap guanine nucleotide exchange factor (GEF) 3                                                                      | 1.61 |
| 1418156_at   | <i>Kcne4</i>                     | potassium voltage-gated channel, Isk-related subfamily, gene 4                                                      | 1.61 |
| 1416116_at   | <i>Orc3l</i>                     | origin recognition complex, subunit 3-like (S. cerevisiae)                                                          | 1.61 |
| 1421814_at   | <i>Msn</i>                       | moesin                                                                                                              | 1.61 |
| 1420856_a_at | <i>Lancl2</i>                    | LanC (bacterial lantibiotic synthetase component C)-like 2                                                          | 1.61 |
| 1424413_at   | <i>Ogfrl1</i>                    | opioid growth factor receptor-like 1                                                                                | 1.61 |
| 1442756_at   | <i>Lnk</i>                       | Linker of T-cell receptor pathways                                                                                  | 1.61 |
| 1435360_at   | <i>Zfp651</i>                    | zinc finger protein 651                                                                                             | 1.61 |
| 1455547_at   | <i>Zc3h7b</i>                    | zinc finger CCCH type containing 7B                                                                                 | 1.61 |
| 1433647_s_at | <i>Rhobtb3</i>                   | Rho-related BTB domain containing 3                                                                                 | 1.61 |
| 1431646_a_at | <i>Stx6</i>                      | syntaxin 6                                                                                                          | 1.61 |
| 1422440_at   | <i>Cdk4</i> /// <i>LOC640611</i> | cyclin-dependent kinase 4 /// similar to Cell division protein kinase 4 (Cyclin-dependent kinase 4) (PSK-J3) (CRK3) | 1.60 |
| 1435649_at   | <i>Nexn</i>                      | nexilin                                                                                                             | 1.60 |
| 1431804_a_at | <i>Sp3</i>                       | trans-acting transcription factor 3                                                                                 | 1.60 |
| 1436984_at   | <i>Abi2</i>                      | abl-interactor 2                                                                                                    | 1.60 |
| 1421193_a_at | <i>Pbx3</i>                      | pre B-cell leukemia transcription factor 3                                                                          | 1.60 |
| 1438382_x_at | <i>2010005J08Rik</i>             | RIKEN cDNA 2010005J08 gene                                                                                          | 1.60 |
| 1434554_at   | <i>Trim37</i>                    | tripartite motif protein 37                                                                                         | 1.60 |
| 1435120_at   | ---                              | Transcribed locus                                                                                                   | 1.60 |
| 1434444_s_at | ---                              | ---                                                                                                                 | 1.60 |
| 1455439_a_at | <i>Lgals1</i>                    | lectin, galactose binding, soluble 1                                                                                | 1.60 |
| 1454843_at   | <i>Prps2</i>                     | phosphoribosyl pyrophosphate synthetase 2                                                                           | 1.60 |
| 1452045_at   | <i>Zfp281</i>                    | zinc finger protein 281                                                                                             | 1.60 |
| 1452837_at   | <i>Lpin2</i>                     | lipin 2                                                                                                             | 1.60 |
| 1433499_at   | <i>2010005J08Rik</i>             | RIKEN cDNA 2010005J08 gene                                                                                          | 1.59 |
| 1428351_at   | <i>Ppm1m</i>                     | protein phosphatase 1M                                                                                              | 1.59 |
| 1425983_x_at | <i>Hipk2</i>                     | homeodomain interacting protein kinase 2                                                                            | 1.59 |
| 1452083_a_at | <i>Pja1</i>                      | praja1, RING-H2 motif containing                                                                                    | 1.59 |
| 1417342_at   | <i>Ppp1r2</i>                    | protein phosphatase 1, regulatory (inhibitor) subunit 2                                                             | 1.59 |
| 1450757_at   | <i>Cdh11</i>                     | cadherin 11                                                                                                         | 1.59 |



|              |                                                      |                                                                                                               |      |
|--------------|------------------------------------------------------|---------------------------------------------------------------------------------------------------------------|------|
| 1431704_a_at | <i>Ralgps2</i>                                       | Ral GEF with PH domain and SH3 binding motif 2                                                                | 1.59 |
| 1448119_at   | <i>Bpgm</i>                                          | 2,3-bisphosphoglycerate mutase                                                                                | 1.59 |
| 1460227_at   | <i>Timp1</i>                                         | tissue inhibitor of metalloproteinase 1                                                                       | 1.59 |
| 1454767_at   | <i>D2Bwg1423e</i>                                    | DNA segment, Chr 2, Brigham & Women's Genetics 1423 expressed                                                 | 1.59 |
| 1426510_at   | <i>Sccpdh</i>                                        | saccharopine dehydrogenase (putative)                                                                         | 1.59 |
| 1431016_at   | <i>Cwf19I1</i>                                       | CWF19-like 1, cell cycle control ( <i>S. pombe</i> )                                                          | 1.58 |
| 1434255_at   | <i>Pacs2</i>                                         | phosphofurin acidic cluster sorting protein 2                                                                 | 1.58 |
| 1455210_at   | <i>Zhx2</i>                                          | zinc fingers and homeoboxes protein 2                                                                         | 1.58 |
| 1424412_at   | <i>Ogfrl1</i>                                        | opioid growth factor receptor-like 1                                                                          | 1.58 |
| 1426280_at   | <i>AV249152</i>                                      | expressed sequence AV249152                                                                                   | 1.58 |
| 1452867_at   | <i>Col4a3bp</i>                                      | procollagen, type IV, alpha 3 (Goodpasture antigen) binding protein                                           | 1.58 |
| 1426024_a_at | <i>Dbn1</i>                                          | drebrin 1                                                                                                     | 1.58 |
| 1451177_at   | <i>Dnajb4</i>                                        | DnaJ (Hsp40) homolog, subfamily B, member 4                                                                   | 1.58 |
| 1455218_at   | <i>6330503K22Rik</i>                                 | RIKEN cDNA 6330503K22 gene                                                                                    | 1.58 |
| 1428529_at   | <i>2810026P18Rik</i>                                 | RIKEN cDNA 2810026P18 gene                                                                                    | 1.58 |
| 1433779_at   | <i>Casc4</i>                                         | cancer susceptibility candidate 4                                                                             | 1.58 |
| 1427169_at   | <i>Als2cr19</i>                                      | amyotrophic lateral sclerosis 2 (juvenile) chromosome region, candidate 19 (human)                            | 1.58 |
| 1451570_a_at | <i>6720467C03Rik</i>                                 | RIKEN cDNA 6720467C03 gene                                                                                    | 1.57 |
| 1415919_at   | <i>Npdc1</i>                                         | neural proliferation, differentiation and control gene 1                                                      | 1.57 |
| 1428441_at   | <i>1500009M05Rik</i>                                 | RIKEN cDNA 1500009M05 gene                                                                                    | 1.57 |
| 1424863_a_at | <i>Hipk2</i>                                         | homeodomain interacting protein kinase 2                                                                      | 1.57 |
| 1442982_at   | <i>Ccdc66</i>                                        | coiled-coil domain containing 66                                                                              | 1.57 |
| 1426160_a_at | <i>Stk16</i>                                         | serine/threonine kinase 16                                                                                    | 1.57 |
| 1437023_at   | <i>Zfp12</i>                                         | zinc finger protein 12                                                                                        | 1.57 |
| 1452992_at   | <i>LOC668450 ///<br/>LOC672690 ///<br/>LOC675848</i> | similar to cell division cycle 26 /// similar to cell division cycle 26 /// similar to cell division cycle 26 | 1.57 |
| 1417107_at   | <i>Tpd52l2</i>                                       | tumor protein D52-like 2                                                                                      | 1.57 |
| 1429508_at   | <i>2310057M21Rik</i>                                 | RIKEN cDNA 2310057M21 gene                                                                                    | 1.57 |
| 1459665_s_at | <i>Mrv1</i>                                          | MRV integration site 1                                                                                        | 1.57 |
| 1435320_at   | <i>Ctdspl2</i>                                       | CTD (carboxy-terminal domain, RNA polymerase II, polypeptide A) small phosphatase like 2                      | 1.57 |
| 1427049_s_at | <i>Smo</i>                                           | smoothened homolog ( <i>Drosophila</i> )                                                                      | 1.57 |
| 1455611_at   | <i>Pias1</i>                                         | protein inhibitor of activated STAT 1                                                                         | 1.57 |
| 1416181_at   | <i>Mesdc2</i>                                        | mesoderm development candidate 2                                                                              | 1.57 |
| 1416469_at   | <i>Luzp1</i>                                         | leucine zipper protein 1                                                                                      | 1.57 |
| 1434233_at   | <i>2610030H06Rik</i>                                 | RIKEN cDNA 2610030H06 gene                                                                                    | 1.56 |
| 1428122_s_at | <i>2610528K11Rik</i>                                 | RIKEN cDNA 2610528K11 gene                                                                                    | 1.56 |
| 1425186_at   | <i>Lmbrd1</i>                                        | LMBR1 domain containing 1                                                                                     | 1.56 |
| 1422477_at   | <i>Cables1 /// LOC635753</i>                         | Cdk5 and Abl enzyme substrate 1 /// similar to Cdk5 and Abl enzyme substrate 1                                | 1.56 |
| 1447975_a_at | <i>LOC545261</i>                                     | hypothetical protein LOC545261                                                                                | 1.56 |

|              |                                   |                                                                                                            |      |
|--------------|-----------------------------------|------------------------------------------------------------------------------------------------------------|------|
| 1423592_at   | <i>Rock2</i>                      | Rho-associated coiled-coil containing protein kinase 2                                                     | 1.56 |
| 1435087_at   | <i>BC039093</i>                   | cDNA sequence BC039093                                                                                     | 1.56 |
| 1456067_at   | <i>Gli3</i>                       | GLI-Kruppel family member GLI3                                                                             | 1.56 |
| 1417605_s_at | <i>Camk1</i> /// <i>LOC669267</i> | calcium/calmodulin-dependent protein kinase I /// similar to calcium/calmodulin-dependent protein kinase I | 1.56 |
| 1451037_at   | <i>Ptpn9</i>                      | protein tyrosine phosphatase, non-receptor type 9                                                          | 1.56 |
| 1448993_at   | <i>Atg3</i>                       | autophagy-related 3 (yeast)                                                                                | 1.56 |
| 1417663_a_at | <i>Ndrq3</i>                      | N-myc downstream regulated gene 3                                                                          | 1.56 |
| 1449069_at   | <i>Zfp148</i>                     | zinc finger protein 148                                                                                    | 1.56 |
| 1451493_at   | <i>Ndfip1</i>                     | Nedd4 family interacting protein 1                                                                         | 1.56 |
| 1421305_x_at | <i>Rabep1</i>                     | rabaptin, RAB GTPase binding effector protein 1                                                            | 1.56 |
| 1455778_at   | <i>Zfp192</i>                     | zinc finger protein 192                                                                                    | 1.56 |
| 1455159_at   | <i>2900057D21Rik</i>              | RIKEN cDNA 2900057D21 gene                                                                                 | 1.56 |
| 1429451_at   | <i>2610301B20Rik</i>              | RIKEN cDNA 2610301B20 gene                                                                                 | 1.56 |
| 1420441_at   | <i>Cenpc1</i>                     | centromere protein C1                                                                                      | 1.56 |
| 1451167_at   | <i>Ccdc101</i>                    | coiled-coil domain containing 101                                                                          | 1.55 |
| 1459997_s_at | <i>Tmem17</i>                     | transmembrane protein 17                                                                                   | 1.55 |
| 1436070_at   | <i>Glo1</i>                       | glyoxalase 1                                                                                               | 1.55 |
| 1417570_at   | <i>Anapc1</i>                     | anaphase promoting complex subunit 1                                                                       | 1.55 |
| 1450981_at   | <i>Cnn2</i>                       | calponin 2                                                                                                 | 1.55 |
| 1454968_at   | <i>1110034A24Rik</i>              | RIKEN cDNA 1110034A24 gene                                                                                 | 1.55 |
| 1429219_at   | <i>1200009F10Rik</i>              | RIKEN cDNA 1200009F10 gene                                                                                 | 1.55 |
| 1416323_at   | <i>Kctd20</i>                     | potassium channel tetramerisation domain containing 20                                                     | 1.55 |
| 1432249_a_at | <i>Ercc8</i>                      | excision repair/ross-complementing rodent repair deficiency, complementation group 8                       | 1.55 |
| 1434299_x_at | <i>Rabl4</i>                      | RAB, member of RAS oncogene family-like 4                                                                  | 1.55 |
| 1428801_at   | <i>Mgat3</i>                      | mannoside acetylglucosaminyltransferase 3                                                                  | 1.55 |
| 1435527_at   | <i>Nfic</i>                       | nuclear factor I/C                                                                                         | 1.55 |
| 1452303_at   | <i>Arhgef10</i>                   | Rho guanine nucleotide exchange factor (GEF) 10                                                            | 1.55 |
| 1449068_at   | <i>Zfp148</i>                     | zinc finger protein 148                                                                                    | 1.55 |
| 1445649_x_at | <i>Zfp142</i>                     | zinc finger protein 142                                                                                    | 1.55 |
| 1452895_at   | <i>Fbxo45</i>                     | F-box protein 45                                                                                           | 1.55 |
| 1428280_at   | <i>Fip111</i>                     | FIP1 like 1 ( <i>S. cerevisiae</i> )                                                                       | 1.55 |
| 1424394_at   | <i>Selm</i>                       | selenoprotein M                                                                                            | 1.55 |
| 1443890_at   | ---                               | Transcribed locus                                                                                          | 1.55 |
| 1415794_a_at | <i>Spin</i>                       | spindlin                                                                                                   | 1.55 |
| 1428827_at   | <i>Whsc1</i>                      | Wolf-Hirschhorn syndrome candidate 1 (human)                                                               | 1.55 |
| 1452327_at   | <i>Iqsec1</i>                     | IQ motif and Sec7 domain 1                                                                                 | 1.54 |
| 1438063_at   | <i>Mphosph9</i>                   | M-phase phosphoprotein 9                                                                                   | 1.54 |
| 1434924_at   | <i>Phf2</i>                       | PHD finger protein 2                                                                                       | 1.54 |
| 1451468_s_at | <i>Xpo5</i>                       | exportin 5                                                                                                 | 1.54 |
| 1415788_at   | <i>Ublcp1</i>                     | ubiquitin-like domain containing CTD phosphatase 1                                                         | 1.54 |

|              |                                          |                                                                                                            |      |
|--------------|------------------------------------------|------------------------------------------------------------------------------------------------------------|------|
| 1429622_at   | <i>Cand2</i>                             | cullin-associated and neddylation-dissociated 2 (putative)                                                 | 1.54 |
| 1422488_at   | <i>Nxt1</i>                              | NTF2-related export protein 1                                                                              | 1.54 |
| 1429558_a_at | <i>Larp7</i>                             | La ribonucleoprotein domain family, member 7                                                               | 1.54 |
| 1449353_at   | <i>Zmat3</i>                             | zinc finger matrin type 3                                                                                  | 1.54 |
| 1443204_at   | <i>Rbms3</i>                             | RNA binding motif, single stranded interacting protein                                                     | 1.53 |
| 1453881_x_at | <i>Cetn1</i>                             | centrin 1                                                                                                  | 1.53 |
| 1437639_at   | <i>3321401G04Rik</i>                     | RIKEN cDNA 3321401G04 gene                                                                                 | 1.53 |
| 1447995_x_at | <i>1700026B20Rik</i>                     | RIKEN cDNA 1700026B20 gene                                                                                 | 1.53 |
| 1429044_at   | <i>Camsap111</i>                         | calmodulin regulated spectrin-associated protein 1-like 1                                                  | 1.53 |
| 1454635_at   | <i>Fbxl3</i>                             | F-box and leucine-rich repeat protein 3                                                                    | 1.53 |
| 1423298_at   | <i>Add3</i>                              | adducin 3 (gamma)                                                                                          | 1.53 |
| 1418501_a_at | <i>Oxr1</i>                              | oxidation resistance 1                                                                                     | 1.53 |
| 1428726_at   | <i>Thumpd2</i>                           | THUMP domain containing 2                                                                                  | 1.53 |
| 1447624_s_at | <i>Stox2</i>                             | storkhead box 2                                                                                            | 1.53 |
| 1419273_at   | <i>C80913</i>                            | expressed sequence C80913                                                                                  | 1.52 |
| 1423536_at   | <i>Strn3</i>                             | striatin, calmodulin binding protein 3                                                                     | 1.52 |
| 1437853_x_at | <i>Ndn</i>                               | necdin                                                                                                     | 1.52 |
| 1418802_at   | <i>R74862</i>                            | expressed sequence R74862                                                                                  | 1.52 |
| 1455268_at   | <i>Zcsl2</i>                             | zinc finger, CSL domain containing 2                                                                       | 1.52 |
| 1417731_at   | <i>Pqbp1</i>                             | polyglutamine binding protein 1                                                                            | 1.52 |
| 1460082_at   | <i>Ing3</i>                              | inhibitor of growth family, member 3                                                                       | 1.52 |
| 1435158_at   | <i>Rbm12b</i>                            | RNA binding motif protein 12B                                                                              | 1.52 |
| 1422502_at   | <i>Parp1</i>                             | poly (ADP-ribose) polymerase family, member 1                                                              | 1.52 |
| 1426482_at   | <i>Prkrir</i>                            | protein-kinase, interferon-inducible double stranded RNA dependent inhibitor, repressor of (P58 repressor) | 1.52 |
| 1441645_s_at | <i>Ipo9</i>                              | importin 9                                                                                                 | 1.52 |
| 1436824_x_at | <i>Rnf26</i> /// LOC668155 /// LOC669536 | ring finger protein 26 /// similar to ring finger protein 26 /// similar to ring finger protein 26         | 1.52 |
| 1456782_at   | <i>Tada1l</i>                            | transcriptional adaptor 1 (HF11 homolog, yeast) like                                                       | 1.52 |
| 1435322_at   | <i>1110011C06Rik</i>                     | RIKEN cDNA 1110011C06 gene                                                                                 | 1.52 |
| 1436596_at   | <i>H2afv</i>                             | H2A histone family, member V                                                                               | 1.52 |
| 1424876_s_at | <i>Spg20</i>                             | spastic paraplegia 20, spartin (Troyer syndrome) homolog (human)                                           | 1.52 |
| 1428561_at   | <i>2610002J23Rik</i>                     | RIKEN cDNA 2610002J23 gene                                                                                 | 1.52 |
| 1454792_s_at | <i>Sephs1</i>                            | selenophosphate synthetase 1                                                                               | 1.52 |
| 1420890_at   | <i>Hccs</i>                              | holocytochrome c synthetase                                                                                | 1.52 |
| 1448324_at   | <i>Rnps1</i>                             | ribonucleic acid binding protein S1                                                                        | 1.52 |
| 1460699_at   | <i>Rps27</i>                             | ribosomal protein S27                                                                                      | 1.52 |
| 1429021_at   | <i>Epha4</i>                             | Eph receptor A4                                                                                            | 1.52 |
| 1436354_at   | <i>Dzip1l</i>                            | DAZ interacting protein 1-like                                                                             | 1.51 |
| 1452615_s_at | <i>Trpt1</i>                             | tRNA phosphotransferase 1                                                                                  | 1.51 |
| 1452923_at   | <i>Ndufa12l</i>                          | Ndufa12-like                                                                                               | 1.51 |
| 1452813_a_at | <i>5033428A16Rik</i>                     | RIKEN cDNA 5033428A16 gene                                                                                 | 1.51 |
| 1454791_a_at | <i>Rbbp4</i>                             | retinoblastoma binding protein 4                                                                           | 1.51 |

|              |                                                                                                                      |                                                                                                                                                                                                 |      |
|--------------|----------------------------------------------------------------------------------------------------------------------|-------------------------------------------------------------------------------------------------------------------------------------------------------------------------------------------------|------|
| 1416675_s_at | <i>Plcd1</i>                                                                                                         | phospholipase C, delta 1                                                                                                                                                                        | 1.51 |
| 1436511_at   | <i>BC031781</i>                                                                                                      | cDNA sequence BC031781                                                                                                                                                                          | 1.51 |
| 1448240_at   | <i>Mbtps1</i>                                                                                                        | membrane-bound transcription factor<br>peptidase, site 1                                                                                                                                        | 1.51 |
| 1418285_at   | <i>Efnb1</i>                                                                                                         | ephrin B1                                                                                                                                                                                       | 1.51 |
| 1422094_a_at | <i>Zfp329</i>                                                                                                        | zinc finger protein 329                                                                                                                                                                         | 1.51 |
| 1451587_a_at | <i>Tipr1</i>                                                                                                         | TIP41, TOR signalling pathway regulator-like<br>( <i>S. cerevisiae</i> )                                                                                                                        | 1.51 |
| 1448398_s_at | <i>Rpl22</i>                                                                                                         | ribosomal protein L22                                                                                                                                                                           | 1.51 |
| 1448684_at   | <i>Ppp1r2</i>                                                                                                        | protein phosphatase 1, regulatory (inhibitor)<br>subunit 2                                                                                                                                      | 1.51 |
| 1423493_a_at | <i>Nfix</i>                                                                                                          | nuclear factor I/X                                                                                                                                                                              | 1.51 |
| 1429458_at   | <i>2410127L17Rik</i> ///<br><i>LOC626107</i> ///<br><i>LOC666456</i> ///<br><i>LOC677519</i> ///<br><i>LOC677553</i> | RIKEN cDNA 2410127L17 gene /// similar to<br>RIKEN cDNA 2410127L17 /// similar to<br>CG11596-PA, isoform A /// similar to<br>CG11596-PA, isoform A /// similar to RIKEN<br>cDNA 2410127L17 gene | 1.51 |
| 1453035_at   | <i>Lnp</i>                                                                                                           | limb and neural patterns                                                                                                                                                                        | 1.51 |
| 1436360_at   | <i>Hkr2</i>                                                                                                          | GLI-Kruppel family member HKR2                                                                                                                                                                  | 1.51 |
| 1453689_at   | <i>Fance</i>                                                                                                         | Fanconi anemia, complementation group E                                                                                                                                                         | 1.51 |
| 1417512_at   | <i>Evi5</i>                                                                                                          | ecotropic viral integration site 5                                                                                                                                                              | 1.51 |
| 1425299_s_at | <i>0610038D11Rik</i> ///<br><i>LOC623390</i> ///<br><i>LOC627985</i> ///<br><i>LOC631562</i> ///<br><i>LOC665860</i> | RIKEN cDNA 0610038D11 gene /// similar to<br>UPF0315 protein /// similar to UPF0315<br>protein /// similar to UPF0315 protein ///<br>similar to UPF0315 protein                                 | 1.51 |
| 1416158_at   | <i>Nr2f2</i>                                                                                                         | nuclear receptor subfamily 2, group F,<br>member 2                                                                                                                                              | 1.51 |
| 1451413_at   | <i>Cast</i>                                                                                                          | calpastatin                                                                                                                                                                                     | 1.51 |
| 1416575_at   | <i>Cdc45l</i>                                                                                                        | cell division cycle 45 homolog ( <i>S. cerevisiae</i> )-<br>like                                                                                                                                | 1.50 |
| 1460626_at   | <i>11-Sep</i>                                                                                                        | septin 11                                                                                                                                                                                       | 1.50 |
| 1457106_at   | <i>Thada</i>                                                                                                         | thyroid adenoma associated                                                                                                                                                                      | 1.50 |
| 1453993_a_at | <i>Bnip2</i>                                                                                                         | BCL2/adenovirus E1B interacting protein 1,<br>NIP2                                                                                                                                              | 1.50 |
| 1460342_s_at | <i>AA536749</i>                                                                                                      | expressed sequence AA536749                                                                                                                                                                     | 1.50 |
| 1428620_at   | <i>Ensa</i>                                                                                                          | endosulfine alpha                                                                                                                                                                               | 1.50 |

**Franco et al., Supplemental Table S3. Genes Decreased Upon Smo Activation.**

| Probe Set    | Gene Symbol                         | Gene Title                                                                                        | Fold Change |
|--------------|-------------------------------------|---------------------------------------------------------------------------------------------------|-------------|
| 1455423_at   | <i>Ndg1</i> ///<br><i>LOC623189</i> | Nur77 downstream gene 1 /// similar to chromosome 6 open reading frame 148                        | -32.76      |
| 1417785_at   | <i>Pla1a</i>                        | phospholipase A1 member A                                                                         | -19.60      |
| 1424600_at   | <i>Abp1</i>                         | amiloride binding protein 1 (amine oxidase, copper-containing)                                    | -16.97      |
| 1448397_at   | <i>Gjb6</i>                         | gap junction membrane channel protein beta 6                                                      | -16.70      |
| 1417231_at   | <i>Cldn2</i>                        | claudin 2                                                                                         | -15.97      |
| 1455802_x_at | <i>Agr2</i>                         | anterior gradient 2 ( <i>Xenopus laevis</i> )                                                     | -15.27      |
| 1448998_at   | <i>Lpo</i>                          | lactoperoxidase                                                                                   | -13.78      |
| 1449269_at   | <i>F5</i>                           | coagulation factor V                                                                              | -13.20      |
| 1418907_at   | ---                                 | ---                                                                                               | -11.98      |
| 1417232_at   | <i>Cldn2</i>                        | claudin 2                                                                                         | -11.31      |
| 1419615_at   | <i>Trpv6</i>                        | transient receptor potential cation channel, subfamily V, member 6                                | -10.95      |
| 1420521_at   | <i>Papln</i>                        | papilin, proteoglycan-like sulfated glycoprotein                                                  | -10.74      |
| 1451597_at   | <i>Tmprss11d</i>                    | transmembrane protease, serine 11d                                                                | -10.63      |
| 1419268_at   | <i>Agr2</i>                         | anterior gradient 2 ( <i>Xenopus laevis</i> )                                                     | -10.26      |
| 1451394_at   | <i>Dpp6</i>                         | dipeptidylpeptidase 6                                                                             | -10.20      |
| 1419699_at   | <i>Scgb3a1</i>                      | secretoglobin, family 3A, member 1                                                                | -9.91       |
| 1423436_at   | <i>Gsta3</i>                        | glutathione S-transferase, alpha 3                                                                | -9.74       |
| 1419139_at   | <i>Gdf5</i>                         | growth differentiation factor 5                                                                   | -9.72       |
| 1451916_s_at | <i>Trim15</i>                       | tripartite motif protein 15                                                                       | -9.68       |
| 1418037_at   | <i>C4bp</i>                         | complement component 4 binding protein                                                            | -9.61       |
| 1429285_at   | <i>Serpina9</i>                     | serine (or cysteine) peptidase inhibitor, clade A (alpha-1 antiproteinase, antitrypsin), member 9 | -9.21       |
| 1455451_at   | <i>AI449310</i>                     | expressed sequence AI449310                                                                       | -9.04       |
| 1418648_at   | <i>Egln3</i>                        | EGL nine homolog 3 ( <i>C. elegans</i> )                                                          | -9.03       |
| 1418649_at   | <i>Egln3</i>                        | EGL nine homolog 3 ( <i>C. elegans</i> )                                                          | -8.86       |
| 1426634_at   | <i>Slc5a9</i>                       | solute carrier family 5 (sodium/glucose cotransporter), member 9                                  | -8.74       |
| 1439661_at   | <i>Slc16a14</i>                     | solute carrier family 16 (monocarboxylic acid transporters), member 14                            | -8.43       |
| 1426284_at   | <i>Krt20</i>                        | keratin 20                                                                                        | -8.43       |
| 1447762_x_at | <i>Car12</i>                        | carbonic anhydrase 12                                                                             | -8.39       |
| 1417333_at   | <i>Rasa4</i>                        | RAS p21 protein activator 4                                                                       | -8.13       |
| 1438573_at   | <i>Rmi1</i>                         | RMI1, RecQ mediated genome instability 1, homolog ( <i>S. cerevisiae</i> )                        | -8.12       |
| 1439494_at   | <i>Slc5a9</i>                       | solute carrier family 5 (sodium/glucose cotransporter), member 9                                  | -8.10       |
| 1455393_at   | ---                                 | ---                                                                                               | -7.36       |
| 1454647_at   | <i>Acad11</i>                       | acyl-Coenzyme A dehydrogenase family, member 11                                                   | -7.14       |
| 1418945_at   | <i>Mmp3</i>                         | matrix metalloproteinase 3                                                                        | -6.97       |
| 1430629_at   | <i>Slc16a14</i>                     | solute carrier family 16 (monocarboxylic acid transporters), member 14                            | -6.87       |
| 1458871_at   | <i>Tmprss11e</i>                    | transmembrane protease, serine 11e                                                                | -6.86       |
| 1455645_at   | <i>8030451F13Rik</i>                | RIKEN cDNA 8030451F13 gene                                                                        | -6.75       |

|              |                        |                                                                                   |       |
|--------------|------------------------|-----------------------------------------------------------------------------------|-------|
| 1455577_at   | <i>Ccl28</i>           | Chemokine (C-C motif) ligand 28                                                   | -6.71 |
| 1456718_at   | <i>Tmem56</i>          | transmembrane protein 56                                                          | -6.71 |
| 1448898_at   | <i>Ccl9</i>            | chemokine (C-C motif) ligand 9                                                    | -6.67 |
| 1428485_at   | <i>Car12</i>           | carbonic anhydrase 12                                                             | -6.57 |
| 1449279_at   | <i>Gpx2</i>            | glutathione peroxidase 2                                                          | -6.55 |
| 1436021_at   | <i>A930031D07Rik</i>   | RIKEN cDNA A930031D07 gene                                                        | -6.51 |
| 1455531_at   | <i>A930031D07Rik</i>   | RIKEN cDNA A930031D07 gene                                                        | -6.43 |
| 1446951_at   | ---                    | ---                                                                               | -6.24 |
| 1451608_a_at | <i>Tspan33</i>         | tetraspanin 33                                                                    | -6.22 |
| 1448929_at   | <i>F13a1</i>           | coagulation factor XIII, A1 subunit                                               | -6.15 |
| 1437631_at   | <i>Kcni4</i>           | Kv channel interacting protein 4                                                  | -6.15 |
| 1415832_at   | <i>Agtr2</i>           | angiotensin II receptor, type 2                                                   | -6.11 |
| 1455561_at   | <i>Cndp1</i>           | carnosine dipeptidase 1 (metallopeptidase M20 family)                             | -5.83 |
| 1417290_at   | <i>Lrg1</i>            | leucine-rich alpha-2-glycoprotein 1                                               | -5.82 |
| 1450291_s_at | <i>Ms4a4c</i>          | membrane-spanning 4-domains, subfamily A, member 4C                               | -5.81 |
| 1417266_at   | <i>Ccl6</i>            | chemokine (C-C motif) ligand 6                                                    | -5.81 |
| 1449005_at   | <i>Slc16a3</i>         | solute carrier family 16 (monocarboxylic acid transporters), member 3             | -5.80 |
| 1453352_at   | <i>9030605H24Rik</i>   | RIKEN cDNA 9030605H24 gene                                                        | -5.80 |
| 1419195_at   | <i>Wfdc15</i>          | WAP four-disulfide core domain 15                                                 | -5.79 |
| 1425731_at   | <i>Ankrd24</i>         | ankyrin repeat domain 24                                                          | -5.73 |
| 1460259_s_at | <i>Clca1 /// Clca2</i> | chloride channel calcium activated 1 /// chloride channel calcium activated 2     | -5.70 |
| 1418476_at   | <i>Crlf1</i>           | cytokine receptor-like factor 1                                                   | -5.69 |
| 1460125_at   | <i>2610301F02Rik</i>   | RIKEN cDNA 2610301F02 gene                                                        | -5.69 |
| 1424794_at   | <i>Rnf186</i>          | ring finger protein 186                                                           | -5.68 |
| 1457429_s_at | <i>Gm106</i>           | gene model 106, (NCBI)                                                            | -5.68 |
| 1427013_at   | <i>Car9</i>            | carbonic anhydrase 9                                                              | -5.61 |
| 1426561_a_at | <i>Npnt</i>            | nephronectin                                                                      | -5.50 |
| 1436538_at   | <i>Ankrd37</i>         | ankyrin repeat domain 37                                                          | -5.49 |
| 1417494_a_at | <i>Cp</i>              | ceruloplasmin                                                                     | -5.47 |
| 1460632_at   | ---                    | ---                                                                               | -5.39 |
| 1417495_x_at | <i>Cp</i>              | ceruloplasmin                                                                     | -5.38 |
| 1425400_a_at | <i>Cited4</i>          | Cbp/p300-interacting transactivator, with Glu/Asp-rich carboxy-terminal domain, 4 | -5.33 |
| 1448734_at   | <i>Cp</i>              | ceruloplasmin                                                                     | -5.29 |
| 1459299_at   | <i>Myo3b</i>           | myosin IIIB                                                                       | -5.26 |
| 1436450_at   | <i>D11Bwg0517e</i>     | DNA segment, Chr 11, Brigham & Women's Genetics 0517 expressed                    | -5.23 |
| 1422833_at   | <i>Foxa2</i>           | forkhead box A2                                                                   | -5.20 |
| 1448601_s_at | <i>Msx1</i>            | homeo box, msh-like 1                                                             | -5.17 |
| 1435239_at   | <i>Gria1</i>           | glutamate receptor, ionotropic, AMPA1 (alpha 1)                                   | -5.16 |
| 1452279_at   | <i>Cfp</i>             | complement factor properdin                                                       | -5.12 |
| 1456978_s_at | <i>D19Ert652e</i>      | DNA segment, Chr 19, ERATO Doi 652, expressed                                     | -5.09 |
| 1426968_a_at | <i>Rdh10</i>           | retinol dehydrogenase 10 (all-trans)                                              | -5.07 |
| 1448972_at   | <i>Gria1</i>           | glutamate receptor, ionotropic, AMPA1 (alpha 1)                                   | -5.00 |



|              |                      |                                                                                           |       |
|--------------|----------------------|-------------------------------------------------------------------------------------------|-------|
| 1439045_x_at | <i>Mtac2d1</i>       | membrane targeting (tandem) C2 domain containing 1                                        | -4.41 |
| 1455452_x_at | <i>AI449310</i>      | expressed sequence AI449310                                                               | -4.40 |
| 1455856_at   | ---                  | ---                                                                                       | -4.39 |
| 1419323_at   | <i>Padi1</i>         | peptidyl arginine deiminase, type I                                                       | -4.39 |
| 1453009_at   | <i>Cpm</i>           | carboxypeptidase M                                                                        | -4.36 |
| 1451139_at   | <i>Slc39a4</i>       | solute carrier family 39 (zinc transporter), member 4                                     | -4.33 |
| 1447227_at   | <i>Slc40a1</i>       | Solute carrier family 40 (iron-regulated transporter), member 1                           | -4.30 |
| 1436532_at   | <i>Dcamk13</i>       | doublecortin and CaM kinase-like 3                                                        | -4.28 |
| 1451375_at   | <i>Ehf</i>           | ets homologous factor                                                                     | -4.28 |
| 1420352_at   | <i>Prss22</i>        | protease, serine, 22                                                                      | -4.23 |
| 1426144_x_at | <i>Trdn</i>          | triadin                                                                                   | -4.21 |
| 1425157_x_at | <i>Tspan33</i>       | tetraspanin 33                                                                            | -4.19 |
| 1440847_at   | <i>Mtss1</i>         | metastasis suppressor 1                                                                   | -4.18 |
| 1455241_at   | <i>BC037703</i>      | cDNA sequence BC037703                                                                    | -4.18 |
| 1448728_a_at | <i>Nfkbiz</i>        | nuclear factor of kappa light polypeptide gene enhancer in B-cells inhibitor, zeta        | -4.17 |
| 1427851_x_at | <i>Igh-VJ558</i>     | immunoglobulin heavy chain (J558 family)                                                  | -4.12 |
| 1419029_at   | <i>Ero1l</i>         | ERO1-like (S. cerevisiae)                                                                 | -4.11 |
| 1439428_x_at | <i>Gmgs</i>          | GDP-mannose 4, 6-dehydratase                                                              | -4.11 |
| 1428977_at   | <i>Chst8</i>         | carbohydrate (N-acetylgalactosamine 4-0) sulfotransferase 8                               | -4.09 |
| 1439396_x_at | <i>Gpd1</i>          | glycerol-3-phosphate dehydrogenase 1 (soluble)                                            | -4.09 |
| 1437397_at   | <i>Prlr</i>          | prolactin receptor                                                                        | -4.07 |
| 1417896_at   | <i>Tjp3</i>          | tight junction protein 3                                                                  | -4.07 |
| 1420499_at   | <i>Gch1</i>          | GTP cyclohydrolase 1                                                                      | -4.02 |
| 1441375_at   | <i>Lrig1</i>         | Leucine-rich repeats and immunoglobulin-like domains 1                                    | -4.01 |
| 1443933_at   | <i>Mtac2d1</i>       | membrane targeting (tandem) C2 domain containing 1                                        | -4.00 |
| 1449049_at   | <i>Tlr1</i>          | toll-like receptor 1                                                                      | -3.99 |
| 1457032_at   | <i>Ak5</i>           | adenylate kinase 5                                                                        | -3.97 |
| 1436237_at   | <i>Ttc9</i>          | tetratricopeptide repeat domain 9                                                         | -3.95 |
| 1418976_s_at | <i>Cideb</i>         | cell death-inducing DNA fragmentation factor, alpha subunit-like effector B               | -3.94 |
| 1455679_at   | <i>5830411E10Rik</i> | RIKEN cDNA 5830411E10 gene                                                                | -3.85 |
| 1417852_x_at | <i>Clca1</i>         | chloride channel calcium activated 1                                                      | -3.85 |
| 1452107_s_at | <i>Npnt</i>          | Nephronectin                                                                              | -3.84 |
| 1451838_a_at | <i>Mtac2d1</i>       | membrane targeting (tandem) C2 domain containing 1                                        | -3.84 |
| 1452106_at   | <i>Npnt</i>          | nephronectin                                                                              | -3.82 |
| 1435945_a_at | <i>Kcnn4</i>         | potassium intermediate/small conductance calcium-activated channel, subfamily N, member 4 | -3.78 |
| 1456795_at   | <i>D330027G24Rik</i> | RIKEN cDNA D330027G24 gene                                                                | -3.78 |
| 1438800_at   | <i>Nagk</i>          | N-acetylglucosamine kinase                                                                | -3.78 |
| 1449639_at   | <i>0610040J01Rik</i> | RIKEN cDNA 0610040J01 gene                                                                | -3.76 |
| 1417520_at   | <i>Nfe2l3</i>        | nuclear factor, erythroid derived 2, like 3                                               | -3.74 |



|              |                                 |                                                                                                                                        |       |
|--------------|---------------------------------|----------------------------------------------------------------------------------------------------------------------------------------|-------|
| 1452426_x_at | <i>Zfp236</i>                   | Zinc finger protein 236 /// CDNA clone IMAGE:4009820                                                                                   | -3.74 |
| 1439528_at   | <i>4833423E24Rik</i>            | RIKEN cDNA 4833423E24 gene                                                                                                             | -3.71 |
| 1418645_at   | <i>Hal</i> /// <i>LOC638196</i> | histidine ammonia lyase /// similar to Histidine ammonia-lyase (Histidase)                                                             | -3.70 |
| 1453480_at   | <i>D630002J15Rik</i>            | RIKEN cDNA D630002J15 gene                                                                                                             | -3.69 |
| 1458070_at   | <i>Vtcn1</i>                    | V-set domain containing T cell activation inhibitor 1                                                                                  | -3.69 |
| 1419605_at   | <i>Mgl1</i>                     | macrophage galactose N-acetyl-galactosamine specific lectin 1                                                                          | -3.68 |
| 1444487_at   | <i>Lrat</i>                     | lecithin-retinol acyltransferase (phosphatidylcholine-retinol-O-acyltransferase)                                                       | -3.68 |
| 1425784_a_at | <i>Olfr1</i>                    | olfactomedin 1                                                                                                                         | -3.68 |
| 1455649_at   | <i>Ttc9</i>                     | tetratricopeptide repeat domain 9                                                                                                      | -3.65 |
| 1435050_at   | <i>D10Bwg1379e</i>              | DNA segment, Chr 10, Brigham & Women's Genetics 1379 expressed                                                                         | -3.65 |
| 1419332_at   | <i>Egfl6</i>                    | EGF-like-domain, multiple 6                                                                                                            | -3.64 |
| 1426633_s_at | <i>Kctd14</i>                   | potassium channel tetramerisation domain containing 14                                                                                 | -3.64 |
| 1449199_at   | <i>Muc1</i>                     | mucin 1, transmembrane                                                                                                                 | -3.63 |
| 1436124_at   | <i>Pcyt1b</i>                   | phosphate cytidylyltransferase 1, choline, beta isoform                                                                                | -3.62 |
| 1423747_a_at | <i>Pdk1</i>                     | pyruvate dehydrogenase kinase, isoenzyme 1                                                                                             | -3.61 |
| 1430135_at   | <i>Dnase2a</i>                  | deoxyribonuclease II alpha                                                                                                             | -3.61 |
| 1417089_a_at | <i>Ckmt1</i>                    | creatine kinase, mitochondrial 1, ubiquitous                                                                                           | -3.60 |
| 1440779_s_at | <i>Slc5a9</i>                   | solute carrier family 5 (sodium/glucose cotransporter), member 9                                                                       | -3.60 |
| 1439732_at   | ---                             | 16 days neonate cerebellum cDNA, RIKEN full-length enriched library, clone:9630041I08 product:unclassifiable, full insert sequence     | -3.59 |
| 1430211_at   | <i>4930415O20Rik</i>            | RIKEN cDNA 4930415O20 gene                                                                                                             | -3.59 |
| 1424404_at   | <i>0610040J01Rik</i>            | RIKEN cDNA 0610040J01 gene                                                                                                             | -3.59 |
| 1436821_at   | <i>Plcx3</i>                    | phosphatidylinositol-specific phospholipase C, X domain containing 3                                                                   | -3.58 |
| 1437506_at   | ---                             | ---                                                                                                                                    | -3.58 |
| 1421401_at   | <i>Kcnmb1</i>                   | Potassium large conductance calcium-activated channel, subfamily M, beta member 1                                                      | -3.56 |
| 1426601_at   | <i>Slc37a1</i>                  | solute carrier family 37 (glycerol-3-phosphate transporter), member 1                                                                  | -3.56 |
| 1426147_s_at | <i>Cldn10</i>                   | claudin 10                                                                                                                             | -3.56 |
| 1439858_at   | ---                             | 12 days embryo spinal ganglion cDNA, RIKEN full-length enriched library, clone:D130031D15 product:unclassifiable, full insert sequence | -3.55 |
| 1452367_at   | <i>Coro2a</i>                   | coronin, actin binding protein 2A                                                                                                      | -3.54 |
| 1419074_at   | <i>2510006C20Rik</i>            | RIKEN cDNA 2510006C20 gene                                                                                                             | -3.53 |
| 1451786_at   | <i>Muc20</i>                    | mucin 20                                                                                                                               | -3.52 |

|              |                                                                                                                              |                                                                                                                                                                                            |       |
|--------------|------------------------------------------------------------------------------------------------------------------------------|--------------------------------------------------------------------------------------------------------------------------------------------------------------------------------------------|-------|
| 1451609_at   | <i>Tspan33</i>                                                                                                               | tetraspanin 33                                                                                                                                                                             | -3.52 |
| 1455796_x_at | <i>Olfm1</i>                                                                                                                 | olfactomedin 1                                                                                                                                                                             | -3.52 |
| 1435308_at   | <i>Fut9</i>                                                                                                                  | fucosyltransferase 9                                                                                                                                                                       | -3.51 |
| 1448871_at   | <i>Mapk13</i>                                                                                                                | mitogen activated protein kinase 13                                                                                                                                                        | -3.50 |
| 1419030_at   | <i>Ero1l</i>                                                                                                                 | ERO1-like ( <i>S. cerevisiae</i> )                                                                                                                                                         | -3.50 |
| 1439948_at   | <i>BC046401</i>                                                                                                              | cDNA sequence BC046401                                                                                                                                                                     | -3.49 |
| 1416596_at   | <i>Slc44a4</i>                                                                                                               | solute carrier family 44, member 4                                                                                                                                                         | -3.49 |
| 1454799_at   | <i>A230097K15Rik</i>                                                                                                         | RIKEN cDNA A230097K15 gene                                                                                                                                                                 | -3.47 |
| 1417600_at   | <i>Slc15a2</i>                                                                                                               | solute carrier family 15 (H+/peptide transporter), member 2                                                                                                                                | -3.47 |
| 1448556_at   | <i>Prlr</i>                                                                                                                  | prolactin receptor                                                                                                                                                                         | -3.47 |
| 1417155_at   | <i>Mycn</i>                                                                                                                  | v-myc myelocytomatosis viral related oncogene, neuroblastoma derived (avian)                                                                                                               | -3.46 |
| 1450131_a_at | <i>Bspry</i>                                                                                                                 | B-box and SPRY domain containing                                                                                                                                                           | -3.46 |
| 1427095_at   | <i>Cdcp1</i>                                                                                                                 | CUB domain containing protein 1                                                                                                                                                            | -3.44 |
| 1449324_at   | <i>Ero1l</i>                                                                                                                 | ERO1-like ( <i>S. cerevisiae</i> )                                                                                                                                                         | -3.44 |
| 1453614_a_at | <i>Nfe2l3</i>                                                                                                                | nuclear factor, erythroid derived 2, like 3                                                                                                                                                | -3.43 |
| 1448227_at   | <i>Grb7</i>                                                                                                                  | growth factor receptor bound protein 7                                                                                                                                                     | -3.43 |
| 1418283_at   | <i>Cldn4</i>                                                                                                                 | claudin 4                                                                                                                                                                                  | -3.42 |
| 1438498_at   | <i>Zmynd15</i>                                                                                                               | zinc finger, MYND-type containing 15                                                                                                                                                       | -3.42 |
| 1429272_a_at | <i>9130022K13Rik</i> ///<br><i>2210421G13Rik</i> ///<br>/// <i>LOC193676</i> ///<br><i>LOC666661</i> ///<br><i>LOC672691</i> | RIKEN cDNA 9130022K13 gene /// RIKEN cDNA 2210421G13 gene /// hypothetical protein LOC193676 /// similar to apolipoprotein L, 3 (predicted) /// similar to apolipoprotein L, 3 (predicted) | -3.40 |
| 1418472_at   | <i>Aspa</i>                                                                                                                  | aspartoacylase (aminoacylase) 2                                                                                                                                                            | -3.40 |
| 1429527_a_at | <i>Plscr1</i> ///<br><i>LOC433328</i> ///<br><i>LOC677340</i>                                                                | phospholipid scramblase 1 /// hypothetical LOC433328 /// hypothetical protein LOC677340                                                                                                    | -3.40 |
| 1452213_at   | <i>Tex2</i>                                                                                                                  | testis expressed gene 2                                                                                                                                                                    | -3.39 |
| 1447979_at   | <i>Rutbc2</i>                                                                                                                | RUN and TBC1 domain containing 2                                                                                                                                                           | -3.39 |
| 1459688_at   | ---                                                                                                                          | Transcribed locus                                                                                                                                                                          | -3.37 |
| 1434606_at   | <i>ErbB3</i>                                                                                                                 | v-erb-b2 erythroblastic leukemia viral oncogene homolog 3 (avian)                                                                                                                          | -3.36 |
| 1422831_at   | <i>Fbn2</i> ///<br><i>LOC639042</i>                                                                                          | fibrillin 2 /// similar to fibrillin 2                                                                                                                                                     | -3.35 |
| 1437766_at   | ---                                                                                                                          | Transcribed locus                                                                                                                                                                          | -3.34 |
| 1428676_at   | <i>Tmprss6</i>                                                                                                               | transmembrane serine protease 6                                                                                                                                                            | -3.33 |
| 1417127_at   | <i>Msx1</i>                                                                                                                  | homeo box, msh-like 1                                                                                                                                                                      | -3.33 |
| 1419456_at   | <i>Dcxr</i>                                                                                                                  | dicarbonyl L-xylulose reductase                                                                                                                                                            | -3.32 |
| 1425669_at   | <i>Mobk12b</i>                                                                                                               | MOB1, Mps One Binder kinase activator-like 2B (yeast)                                                                                                                                      | -3.32 |
| 1452298_a_at | <i>Myo5b</i>                                                                                                                 | myosin Vb                                                                                                                                                                                  | -3.32 |
| 1427521_a_at | <i>9930023K05Rik</i>                                                                                                         | RIKEN cDNA 9930023K05 gene                                                                                                                                                                 | -3.32 |
| 1455186_a_at | <i>1190003J15Rik</i>                                                                                                         | RIKEN cDNA 1190003J15 gene                                                                                                                                                                 | -3.31 |
| 1420579_s_at | <i>Cftr</i>                                                                                                                  | cystic fibrosis transmembrane conductance regulator homolog                                                                                                                                | -3.30 |
| 1425109_at   | <i>Slc44a3</i>                                                                                                               | solute carrier family 44, member 3                                                                                                                                                         | -3.29 |
| 1420712_a_at | <i>Hpn</i>                                                                                                                   | hepsin                                                                                                                                                                                     | -3.29 |
| 1452826_s_at | <i>Fbx20</i>                                                                                                                 | F-box and leucine-rich repeat protein 20                                                                                                                                                   | -3.29 |
| 1450699_at   | <i>Selenbp1</i>                                                                                                              | selenium binding protein 1                                                                                                                                                                 | -3.29 |

|              |                                              |                                                                                                                                    |       |
|--------------|----------------------------------------------|------------------------------------------------------------------------------------------------------------------------------------|-------|
| 1458347_s_at | <i>Tmprss2</i>                               | transmembrane protease, serine 2                                                                                                   | -3.28 |
| 1431076_at   | <i>Add2</i>                                  | adducin 2 (beta)                                                                                                                   | -3.28 |
| 1457138_x_at | <i>Optc</i>                                  | Opticin                                                                                                                            | -3.28 |
| 1437523_s_at | <i>Sgcg</i>                                  | sarcoglycan, gamma (dystrophin-associated glycoprotein)                                                                            | -3.28 |
| 1460406_at   | <i>AI427122</i>                              | expressed sequence AI427122                                                                                                        | -3.28 |
| 1429692_s_at | <i>Gch1</i>                                  | GTP cyclohydrolase 1                                                                                                               | -3.27 |
| 1437306_at   | <i>C130092O11Rik</i>                         | RIKEN cDNA C130092O11 gene                                                                                                         | -3.27 |
| 1445132_at   | <i>Rnpep</i>                                 | Arginyl aminopeptidase (aminopeptidase B)                                                                                          | -3.27 |
| 1431786_s_at | <i>1190003J15Rik</i>                         | RIKEN cDNA 1190003J15 gene                                                                                                         | -3.26 |
| 1439476_at   | <i>Dsg2</i>                                  | desmoglein 2                                                                                                                       | -3.25 |
| 1437846_x_at | <i>Bace2</i>                                 | beta-site APP-cleaving enzyme 2                                                                                                    | -3.24 |
| 1421400_at   | <i>Kcnmb1</i>                                | potassium large conductance calcium-activated channel, subfamily M, beta member 1                                                  | -3.23 |
| 1453326_at   | <i>3300001A09Rik</i> ///<br><i>LOC244911</i> | RIKEN cDNA 3300001A09 gene /// similar to 3300001A09Rik protein                                                                    | -3.23 |
| 1453355_at   | <i>Wnk2</i>                                  | WNK lysine deficient protein kinase 2                                                                                              | -3.23 |
| 1421525_a_at | <i>Birc1e</i>                                | baculoviral IAP repeat-containing 1e                                                                                               | -3.23 |
| 1438645_x_at | <i>Bace2</i>                                 | beta-site APP-cleaving enzyme 2                                                                                                    | -3.22 |
| 1434830_at   | <i>Mxd1</i>                                  | MAX dimerization protein 1                                                                                                         | -3.22 |
| 1460273_a_at | <i>Birc1b</i>                                | baculoviral IAP repeat-containing 1b                                                                                               | -3.21 |
| 1423271_at   | <i>Gjb2</i>                                  | gap junction membrane channel protein beta 2                                                                                       | -3.20 |
| 1448289_at   | <i>Crmp1</i>                                 | collapsin response mediator protein 1                                                                                              | -3.20 |
| 1451331_at   | <i>Ppp1r1b</i>                               | protein phosphatase 1, regulatory (inhibitor) subunit 1B                                                                           | -3.19 |
| 1423284_at   | <i>Mansc1</i>                                | MANSC domain containing 1                                                                                                          | -3.17 |
| 1449314_at   | <i>Zfpm2</i>                                 | zinc finger protein, multitype 2                                                                                                   | -3.17 |
| 1439560_x_at | <i>LOC432995</i>                             | hypothetical gene supported by BC047216                                                                                            | -3.17 |
| 1442078_at   | <i>Ctdspl2</i>                               | CTD (carboxy-terminal domain, RNA polymerase II, polypeptide A) small phosphatase like 2                                           | -3.17 |
| 1434382_at   | <i>Serinc2</i>                               | serine incorporator 2                                                                                                              | -3.16 |
| 1457157_at   | <i>Plch1</i>                                 | phospholipase C, eta 1                                                                                                             | -3.16 |
| 1427149_at   | <i>Plekha6</i>                               | pleckstrin homology domain containing, family A member 6                                                                           | -3.15 |
| 1448690_at   | <i>Kcnk1</i>                                 | potassium channel, subfamily K, member 1                                                                                           | -3.15 |
| 1438712_at   | <i>Dennd2d</i>                               | DENN/MADD domain containing 2D                                                                                                     | -3.14 |
| 1429184_at   | <i>Gvin1</i>                                 | GTPase, very large interferon inducible 1                                                                                          | -3.13 |
| 1454830_at   | <i>Fbn2</i>                                  | fibrillin 2                                                                                                                        | -3.13 |
| 1452703_at   | <i>4631427C17Rik</i>                         | RIKEN cDNA 4631427C17 gene                                                                                                         | -3.13 |
| 1447604_at   | <i>BC053393</i>                              | cDNA sequence BC053393                                                                                                             | -3.12 |
| 1422677_at   | <i>Dgat2</i>                                 | diacylglycerol O-acyltransferase 2                                                                                                 | -3.12 |
| 1433683_at   | <i>Rbm35b</i>                                | RNA binding motif protein 35b                                                                                                      | -3.12 |
| 1437085_at   | <i>D630039A03Rik</i>                         | RIKEN cDNA D630039A03 gene                                                                                                         | -3.11 |
| 1445501_at   | ---                                          | 12 days embryo spinal cord cDNA, RIKEN full-length enriched library, clone:C530045D16 product:unclassifiable, full insert sequence | -3.10 |

|              |                                      |                                                                                                                                   |       |
|--------------|--------------------------------------|-----------------------------------------------------------------------------------------------------------------------------------|-------|
| 1438021_at   | <i>BC013481</i>                      | cDNA sequence BC013481                                                                                                            | -3.09 |
| 1420578_at   | <i>Opc</i>                           | opticin                                                                                                                           | -3.09 |
| 1460570_at   | <i>Pgbd5</i>                         | piggyBac transposable element derived 5                                                                                           | -3.08 |
| 1443827_x_at | <i>BC004044</i>                      | cDNA sequence BC004044                                                                                                            | -3.08 |
| 1424409_at   | <i>Cldn23</i>                        | claudin 23                                                                                                                        | -3.08 |
| 1438745_at   | <i>LOC666945</i>                     | hypothetical protein LOC666945                                                                                                    | -3.07 |
| 1447621_s_at | <i>2610307O08Rik</i>                 | RIKEN cDNA 2610307O08 gene                                                                                                        | -3.07 |
| 1451318_a_at | <i>Lyn</i> ///<br><i>LOC676654</i>   | Yamaguchi sarcoma viral (v-yes-1) oncogene homolog /// similar to Yamaguchi sarcoma viral (v-yes-1) oncogene homolog              | -3.07 |
| 1426873_s_at | <i>Jup</i>                           | junction plakoglobin                                                                                                              | -3.07 |
| 1418671_at   | <i>Capn5</i>                         | calpain 5                                                                                                                         | -3.06 |
| 1447774_x_at | <i>5730469M10Rik</i>                 | RIKEN cDNA 5730469M10 gene                                                                                                        | -3.06 |
| 1433063_at   | <i>Wdr66</i>                         | WD repeat domain 66                                                                                                               | -3.06 |
| 1427009_at   | <i>Lama5</i> ///<br><i>LOC671909</i> | laminin, alpha 5 /// similar to Laminin alpha-5 chain precursor                                                                   | -3.05 |
| 1419350_at   | <i>Hook2</i>                         | hook homolog 2 (Drosophila)                                                                                                       | -3.04 |
| 1422699_at   | <i>Alox12</i>                        | arachidonate 12-lipoxygenase                                                                                                      | -3.04 |
| 1447807_s_at | <i>Plekhh1</i>                       | pleckstrin homology domain containing, family H (with MyTH4 domain) member 1                                                      | -3.03 |
| 1444238_at   | ---                                  | 7 days neonate cerebellum cDNA, RIKEN full-length enriched library, clone:A730093O14 product:unclassifiable, full insert sequence | -3.02 |
| 1427512_a_at | <i>Lama3</i> ///<br><i>LOC669814</i> | laminin, alpha 3 /// similar to Laminin alpha-3 chain precursor (Nicein alpha subunit)                                            | -3.02 |
| 1415698_at   | <i>Golph2</i>                        | golgi phosphoprotein 2                                                                                                            | -3.01 |
| 1454809_at   | <i>Ncoa7</i>                         | nuclear receptor coactivator 7                                                                                                    | -3.01 |
| 1434158_at   | <i>Gmgs</i>                          | GDP-mannose 4, 6-dehydratase                                                                                                      | -3.01 |
| 1439260_a_at | <i>Enpp3</i>                         | ectonucleotide pyrophosphatase/phosphodiesterase 3                                                                                | -3.00 |
| 1450217_at   | <i>Ccl28</i>                         | chemokine (C-C motif) ligand 28                                                                                                   | -3.00 |
| 1425598_a_at | <i>LOC676654</i>                     | similar to Yamaguchi sarcoma viral (v-yes-1) oncogene homolog                                                                     | -3.00 |
| 1453794_at   | <i>Fer1l4</i>                        | fer-1-like 4 (C. elegans)                                                                                                         | -2.99 |
| 1419154_at   | <i>Tmprss2</i>                       | transmembrane protease, serine 2                                                                                                  | -2.98 |
| 1438756_at   | <i>Ankrd29</i>                       | ankyrin repeat domain 29                                                                                                          | -2.97 |
| 1439748_at   | <i>Dpp6</i>                          | dipeptidylpeptidase 6                                                                                                             | -2.97 |
| 1451261_s_at | <i>AW049765</i>                      | expressed sequence AW049765                                                                                                       | -2.97 |
| 1440200_at   | <i>9630031F12Rik</i>                 | RIKEN cDNA 9630031F12 gene                                                                                                        | -2.97 |
| 1449740_s_at | <i>Dsg2</i>                          | desmoglein 2                                                                                                                      | -2.97 |
| 1416673_at   | <i>Bace2</i>                         | beta-site APP-cleaving enzyme 2                                                                                                   | -2.97 |
| 1427178_at   | <i>Tmc4</i>                          | transmembrane channel-like gene family 4                                                                                          | -2.96 |
| 1421947_at   | <i>Gng12</i>                         | guanine nucleotide binding protein (G protein), gamma 12                                                                          | -2.96 |
| 1455896_a_at | <i>Kcnk1</i>                         | potassium channel, subfamily K, member 1                                                                                          | -2.96 |

|              |                      |                                                                                                                                                                          |       |
|--------------|----------------------|--------------------------------------------------------------------------------------------------------------------------------------------------------------------------|-------|
| 1444524_at   | ---                  | Activated spleen cDNA, RIKEN full-length enriched library, clone:F830206P12 product:hypothetical Cytochrome c heme-binding site containing protein, full insert sequence | -2.96 |
| 1455803_at   | <i>Slco4a1</i>       | solute carrier organic anion transporter family, member 4a1                                                                                                              | -2.96 |
| 1453264_at   | <i>Marveld3</i>      | MARVEL (membrane-associating) domain containing 3                                                                                                                        | -2.95 |
| 1420378_at   | <i>Sftpd</i>         | surfactant associated protein D                                                                                                                                          | -2.95 |
| 1422823_at   | <i>Eps8</i>          | epidermal growth factor receptor pathway substrate 8                                                                                                                     | -2.95 |
| 1450731_s_at | <i>Tnfrsf21</i>      | tumor necrosis factor receptor superfamily, member 21                                                                                                                    | -2.95 |
| 1427357_at   | <i>Cda</i>           | cytidine deaminase                                                                                                                                                       | -2.94 |
| 1452257_at   | <i>Bdh1</i>          | 3-hydroxybutyrate dehydrogenase, type 1                                                                                                                                  | -2.94 |
| 1427164_at   | <i>Il13ra1</i>       | interleukin 13 receptor, alpha 1                                                                                                                                         | -2.93 |
| 1427878_at   | <i>0610010012Rik</i> | RIKEN cDNA 0610010012 gene                                                                                                                                               | -2.93 |
| 1417580_s_at | <i>Selenbp1</i>      | selenium binding protein 1                                                                                                                                               | -2.93 |
| 1417812_a_at | <i>Lamb3</i>         | laminin, beta 3                                                                                                                                                          | -2.92 |
| 1419314_at   | <i>Tinag</i>         | tubulointerstitial nephritis antigen                                                                                                                                     | -2.91 |
| 1426300_at   | <i>Alcam</i>         | activated leukocyte cell adhesion molecule                                                                                                                               | -2.91 |
| 1419510_at   | <i>Es22</i>          | esterase 22                                                                                                                                                              | -2.91 |
| 1418207_at   | <i>Fxyd4</i>         | FXD domain-containing ion transport regulator 4                                                                                                                          | -2.90 |
| 1458591_at   | <i>Rasef</i>         | RAS and EF hand domain containing                                                                                                                                        | -2.90 |
| 1417738_at   | <i>Rab25</i>         | RAB25, member RAS oncogene family                                                                                                                                        | -2.89 |
| 1435389_at   | <i>Reps2</i>         | RALBP1 associated Eps domain containing protein 2                                                                                                                        | -2.86 |
| 1416916_at   | <i>Elf3</i>          | E74-like factor 3                                                                                                                                                        | -2.86 |
| 1453282_at   | <i>Cxadr</i>         | coxsackievirus and adenovirus receptor                                                                                                                                   | -2.86 |
| 1428574_a_at | <i>Chn2</i>          | chimerin (chimaerin) 2                                                                                                                                                   | -2.85 |
| 1441679_at   | <i>Cacna1c</i>       | Calcium channel, voltage-dependent, L type, alpha 1C subunit                                                                                                             | -2.85 |
| 1426664_x_at | <i>Slc45a3</i>       | solute carrier family 45, member 3                                                                                                                                       | -2.85 |
| 1423748_at   | <i>Pdk1</i>          | pyruvate dehydrogenase kinase, isoenzyme 1                                                                                                                               | -2.85 |
| 1452232_at   | <i>Galnt7</i>        | UDP-N-acetyl-alpha-D-galactosamine: polypeptide N-acetylgalactosaminyltransferase 7                                                                                      | -2.83 |
| 1419603_at   | <i>LOC672547</i>     | similar to Interferon-activatable protein 204 (Ifi-204) (Interferon-inducible protein p204)                                                                              | -2.83 |
| 1434530_at   | <i>Odz4</i>          | odd Oz/ten-m homolog 4 (Drosophila)                                                                                                                                      | -2.83 |
| 1418243_at   | <i>Fcna</i>          | ficolin A                                                                                                                                                                | -2.83 |
| 1438232_at   | <i>Foxp2</i>         | forkhead box P2                                                                                                                                                          | -2.82 |
| 1457648_x_at | <i>BC004044</i>      | cDNA sequence BC004044                                                                                                                                                   | -2.82 |
| 1443579_s_at | <i>Depdc6</i>        | DEP domain containing 6                                                                                                                                                  | -2.82 |
| 1448249_at   | <i>Gpd1</i>          | glycerol-3-phosphate dehydrogenase 1 (soluble)                                                                                                                           | -2.82 |
| 1447264_at   | <i>Rab11fip1</i>     | RAB11 family interacting protein 1 (class I)                                                                                                                             | -2.82 |
| 1417577_at   | <i>Trpc3</i>         | transient receptor potential cation channel, subfamily C, member 3                                                                                                       | -2.82 |

|              |                      |                                                                                     |       |
|--------------|----------------------|-------------------------------------------------------------------------------------|-------|
| 1435836_at   | <i>Pdk1</i>          | pyruvate dehydrogenase kinase, isoenzyme 1                                          | -2.81 |
| 1449160_at   | <i>Npr1</i>          | natriuretic peptide receptor 1                                                      | -2.81 |
| 1421118_a_at | <i>Gpr56</i>         | G protein-coupled receptor 56                                                       | -2.81 |
| 1434851_s_at | <i>Crb3</i>          | crumbs homolog 3 (Drosophila)                                                       | -2.81 |
| 1426441_at   | <i>Slc11a2</i>       | solute carrier family 11 (proton-coupled divalent metal ion transporters), member 2 | -2.80 |
| 1432377_x_at | <i>Shroom3</i>       | shroom family member 3                                                              | -2.80 |
| 1447870_x_at | <i>1110002E22Rik</i> | RIKEN cDNA 1110002E22 gene                                                          | -2.80 |
| 1456481_at   | <i>D9Erd280e</i>     | DNA segment, Chr 9, ERATO Doi 280, expressed                                        | -2.79 |
| 1454783_at   | <i>Il13ra1</i>       | interleukin 13 receptor, alpha 1                                                    | -2.79 |
| 1419024_at   | <i>Ptp4a1</i>        | protein tyrosine phosphatase 4a1                                                    | -2.79 |
| 1428671_at   | <i>2200002D01Rik</i> | RIKEN cDNA 2200002D01 gene                                                          | -2.78 |
| 1458140_at   | <i>Slit2</i>         | slit homolog 2 (Drosophila)                                                         | -2.78 |
| 1416225_at   | <i>Adh1</i>          | alcohol dehydrogenase 1 (class I)                                                   | -2.78 |
| 1416689_at   | <i>Tuft1</i>         | tuftelin 1                                                                          | -2.78 |
| 1418076_at   | <i>St14</i>          | suppression of tumorigenicity 14 (colon carcinoma)                                  | -2.78 |
| 1431829_a_at | <i>Rgl3</i>          | ral guanine nucleotide dissociation stimulator-like 3                               | -2.78 |
| 1419571_at   | <i>Slc28a3</i>       | solute carrier family 28 (sodium-coupled nucleoside transporter), member 3          | -2.77 |
| 1437486_at   | <i>Gprc5a</i>        | G protein-coupled receptor, family C, group 5, member A                             | -2.77 |
| 1418086_at   | <i>Ppp1r14a</i>      | protein phosphatase 1, regulatory (inhibitor) subunit 14A                           | -2.77 |
| 1458648_at   | <i>AU042950</i>      | expressed sequence AU042950                                                         | -2.77 |
| 1420832_at   | <i>Qscn6</i>         | quiescin Q6                                                                         | -2.76 |
| 1435053_s_at | <i>Plekhh1</i>       | pleckstrin homology domain containing, family H (with MyTH4 domain) member 1        | -2.76 |
| 1434151_at   | <i>Mettl7a</i>       | methyltransferase like 7A                                                           | -2.76 |
| 1418415_at   | <i>Hoxb5</i>         | homeo box B5                                                                        | -2.76 |
| 1444119_at   | <i>B930006L02Rik</i> | RIKEN cDNA B930006L02 gene                                                          | -2.76 |
| 1427605_at   | <i>Hoxb3</i>         | homeo box B3                                                                        | -2.75 |
| 1424268_at   | <i>Smox</i>          | spermine oxidase                                                                    | -2.75 |
| 1443814_x_at | <i>Ctsh</i>          | cathepsin H                                                                         | -2.75 |
| 1435155_at   | <i>Cgn</i>           | cingulin                                                                            | -2.74 |
| 1416832_at   | <i>Slc39a8</i>       | solute carrier family 39 (metal ion transporter), member 8                          | -2.74 |
| 1418818_at   | <i>Aqp5</i>          | aquaporin 5                                                                         | -2.74 |
| 1429863_at   | <i>Lonrf3</i>        | LON peptidase N-terminal domain and ring finger 3                                   | -2.73 |
| 1433485_x_at | <i>Gpr56</i>         | G protein-coupled receptor 56                                                       | -2.73 |
| 1425715_at   | <i>Il1f8</i>         | interleukin 1 family, member 8                                                      | -2.73 |
| 1427165_at   | <i>Il13ra1</i>       | interleukin 13 receptor, alpha 1                                                    | -2.72 |
| 1444409_at   | <i>Kbtbd8</i>        | Kelch repeat and BTB (POZ) domain containing 8                                      | -2.72 |
| 1452626_a_at | <i>1810014F10Rik</i> | RIKEN cDNA 1810014F10 gene                                                          | -2.72 |
| 1419474_a_at | <i>Ehf</i>           | ets homologous factor                                                               | -2.71 |
| 1422708_at   | <i>Pik3cg</i>        | phosphoinositide-3-kinase, catalytic, gamma polypeptide                             | -2.71 |

|              |                                              |                                                                              |       |
|--------------|----------------------------------------------|------------------------------------------------------------------------------|-------|
| 1418216_at   | <i>Ggta1</i>                                 | gamma-glutamyltransferase-like activity 1                                    | -2.71 |
| 1448873_at   | <i>Ocln</i>                                  | occludin                                                                     | -2.70 |
| 1433184_at   | <i>6720477C19Rik</i>                         | RIKEN cDNA 6720477C19 gene                                                   | -2.70 |
| 1437219_at   | <i>Igf1r</i>                                 | Insulin-like growth factor I receptor                                        | -2.69 |
| 1431114_at   | <i>Dock4</i>                                 | dedicator of cytokinesis 4                                                   | -2.69 |
| 1446720_at   | <i>Alcam</i>                                 | Activated leukocyte cell adhesion molecule                                   | -2.69 |
| 1455565_at   | <i>Bcl9</i>                                  | B-cell CLL/lymphoma 9                                                        | -2.68 |
| 1427302_at   | <i>Enpp3</i>                                 | ectonucleotide pyrophosphatase/phosphodiesterase 3                           | -2.68 |
| 1418329_at   | <i>Pgpep1</i>                                | pyroglutamyl-peptidase I                                                     | -2.68 |
| 1427911_at   | <i>2610307O08Rik</i>                         | RIKEN cDNA 2610307O08 gene                                                   | -2.67 |
| 1433398_at   | <i>Fgd3</i>                                  | FYVE, RhoGEF and PH domain containing 3                                      | -2.67 |
| 1431692_a_at | <i>Cblc</i>                                  | Casitas B-lineage lymphoma c                                                 | -2.67 |
| 1433885_at   | <i>Iqgap2</i>                                | IQ motif containing GTPase activating protein 2                              | -2.66 |
| 1451363_a_at | <i>Dennd2d</i>                               | DENN/MADD domain containing 2D                                               | -2.66 |
| 1419477_at   | <i>Clec2d</i>                                | C-type lectin domain family 2, member d                                      | -2.66 |
| 1424814_a_at | <i>Bcl2l14</i>                               | Bcl2-like 14 (apoptosis facilitator)                                         | -2.66 |
| 1460190_at   | <i>Ap1m2</i>                                 | adaptor protein complex AP-1, mu 2 subunit                                   | -2.66 |
| 1435463_s_at | <i>Myo1d</i>                                 | myosin ID                                                                    | -2.66 |
| 1416579_a_at | <i>Tacstd1</i>                               | tumor-associated calcium signal transducer 1                                 | -2.66 |
| 1419132_at   | <i>Tlr2</i>                                  | toll-like receptor 2                                                         | -2.66 |
| 1417797_a_at | <i>1810019J16Rik</i>                         | RIKEN cDNA 1810019J16 gene                                                   | -2.65 |
| 1427410_at   | <i>Dleu2</i>                                 | deleted in lymphocytic leukemia, 2                                           | -2.65 |
| 1425922_a_at | <i>Mycn</i>                                  | v-myc myelocytomatosis viral related oncogene, neuroblastoma derived (avian) | -2.65 |
| 1424652_at   | <i>Tmem166</i>                               | transmembrane protein 166                                                    | -2.65 |
| 1418025_at   | <i>Bhlhb2</i>                                | basic helix-loop-helix domain containing, class B2                           | -2.64 |
| 1425619_s_at | <i>Dsg2</i>                                  | desmoglein 2                                                                 | -2.64 |
| 1455936_a_at | <i>Rbpms</i>                                 | RNA binding protein gene with multiple splicing                              | -2.63 |
| 1452514_a_at | <i>Kit</i>                                   | kit oncogene                                                                 | -2.63 |
| 1424659_at   | <i>Slit2</i>                                 | slit homolog 2 (Drosophila)                                                  | -2.63 |
| 1418655_at   | <i>B4galnt1</i>                              | beta-1,4-N-acetyl-galactosaminyl transferase 1                               | -2.63 |
| 1417640_at   | <i>Cd79b</i>                                 | CD79B antigen                                                                | -2.63 |
| 1432103_a_at | <i>Sh3gl3</i>                                | SH3-domain GRB2-like 3                                                       | -2.63 |
| 1433870_at   | <i>Atad4</i>                                 | ATPase family, AAA domain containing 4                                       | -2.63 |
| 1425733_a_at | <i>Eps8</i>                                  | epidermal growth factor receptor pathway substrate 8                         | -2.63 |
| 1459632_at   | <i>Crim1</i>                                 | Cysteine rich transmembrane BMP regulator 1 (chordin like)                   | -2.63 |
| 1451780_at   | <i>Blnk</i>                                  | B-cell linker                                                                | -2.62 |
| 1422678_at   | <i>Dgat2</i>                                 | diacylglycerol O-acyltransferase 2                                           | -2.62 |
| 1452861_at   | <i>2010300C02Rik</i> ///<br><i>LOC639555</i> | RIKEN cDNA 2010300C02 gene /// similar to Y59A8B.19                          | -2.62 |
| 1418762_at   | <i>Cd55</i>                                  | CD55 antigen                                                                 | -2.61 |

|              |                                |                                                                                    |       |
|--------------|--------------------------------|------------------------------------------------------------------------------------|-------|
| 1422824_s_at | <i>Eps8</i>                    | epidermal growth factor receptor pathway substrate 8                               | -2.61 |
| 1445148_at   | <i>Plcl1</i>                   | Phospholipase C-like 1                                                             | -2.61 |
| 1424148_a_at | <i>AW049765</i>                | expressed sequence AW049765                                                        | -2.61 |
| 1434150_a_at | <i>Mettl7a</i> /// <i>Ubie</i> | methyltransferase like 7A /// UbiE-YGHL1 fusion protein                            | -2.60 |
| 1449221_a_at | <i>Rrbp1</i>                   | ribosome binding protein 1                                                         | -2.60 |
| 1417588_at   | <i>Galnt3</i>                  | UDP-N-acetyl-alpha-D-galactosamine:polypeptide N-acetylgalactosaminyltransferase 3 | -2.60 |
| 1437467_at   | <i>Alcam</i>                   | activated leukocyte cell adhesion molecule                                         | -2.60 |
| 1451775_s_at | <i>Il13ra1</i>                 | interleukin 13 receptor, alpha 1                                                   | -2.60 |
| 1426146_a_at | <i>Chpt1</i>                   | choline phosphotransferase 1                                                       | -2.59 |
| 1427042_at   | <i>Mal2</i>                    | mal, T-cell differentiation protein 2                                              | -2.59 |
| 1460242_at   | <i>Cd55</i>                    | CD55 antigen                                                                       | -2.59 |
| 1440091_at   | <i>Mrg1</i>                    | myeloid ecotropic viral integration site-related gene 1                            | -2.59 |
| 1420650_at   | <i>Atbf1</i>                   | AT motif binding factor 1                                                          | -2.58 |
| 1421679_a_at | <i>Cdkn1a</i>                  | cyclin-dependent kinase inhibitor 1A (P21)                                         | -2.58 |
| 1429028_at   | <i>Dock11</i>                  | dedicator of cytokinesis 11                                                        | -2.58 |
| 1451348_at   | <i>Depdc6</i>                  | DEP domain containing 6                                                            | -2.58 |
| 1452517_at   | <i>Plekhh1</i>                 | pleckstrin homology domain containing, family H (with MyTH4 domain) member 1       | -2.57 |
| 1456510_x_at | <i>Ubie</i>                    | UbiE-YGHL1 fusion protein                                                          | -2.57 |
| 1425128_at   | <i>B3gnt8</i>                  | UDP-GlcNAc:betaGal beta-1,3-N-acetylglucosaminyltransferase 8                      | -2.57 |
| 1418320_at   | <i>Prss8</i>                   | protease, serine, 8 (prostasin)                                                    | -2.57 |
| 1458617_at   | <i>Prkcbp1</i>                 | protein kinase C binding protein 1                                                 | -2.57 |
| 1447166_at   | <i>E230002P03Rik</i>           | RIKEN cDNA E230002P03 gene                                                         | -2.56 |
| 1419977_s_at | <i>Rbm35b</i>                  | RNA binding motif protein 35b                                                      | -2.56 |
| 1460080_at   | <i>AI645535</i>                | expressed sequence AI645535                                                        | -2.56 |
| 1449396_at   | <i>Aoc3</i>                    | amine oxidase, copper containing 3                                                 | -2.56 |
| 1429639_at   | <i>Prei4</i>                   | preimplantation protein 4                                                          | -2.56 |
| 1426123_a_at | <i>Rrbp1</i>                   | ribosome binding protein 1                                                         | -2.56 |
| 1449076_x_at | <i>Adi1</i>                    | acireductone dioxygenase 1                                                         | -2.56 |
| 1417688_at   | <i>BC004044</i>                | cDNA sequence BC004044                                                             | -2.56 |
| 1451701_x_at | <i>Cldn3</i>                   | claudin 3                                                                          | -2.56 |
| 1429262_at   | <i>Rassf6</i>                  | Ras association (RalGDS/AF-6) domain family 6                                      | -2.55 |
| 1434651_a_at | <i>Cldn3</i>                   | claudin 3                                                                          | -2.55 |
| 1460569_x_at | <i>Cldn3</i>                   | claudin 3                                                                          | -2.55 |
| 1442920_at   | <i>Klf3</i>                    | Kruppel-like factor 3 (basic)                                                      | -2.55 |
| 1449863_a_at | <i>Dlx5</i>                    | distal-less homeobox 5                                                             | -2.55 |
| 1422629_s_at | <i>Shroom3</i>                 | shroom family member 3                                                             | -2.55 |
| 1451407_at   | <i>Jam4</i>                    | junction adhesion molecule 4                                                       | -2.54 |
| 1449579_at   | <i>Sh3yl1</i>                  | Sh3 domain YSC-like 1                                                              | -2.53 |
| 1457404_at   | <i>Nfkbiz</i>                  | Nuclear factor of kappa light polypeptide gene enhancer in B-cells inhibitor, zeta | -2.53 |
| 1437103_at   | <i>Igf2bp2</i>                 | insulin-like growth factor 2 mRNA binding protein 2                                | -2.52 |
| 1449534_at   | <i>Sycp3</i>                   | synaptonemal complex protein 3                                                     | -2.52 |
| 1457104_at   | <i>D930036F22Rik</i>           | RIKEN cDNA D930036F22 gene                                                         | -2.52 |



|              |                      |                                                                                                                        |       |
|--------------|----------------------|------------------------------------------------------------------------------------------------------------------------|-------|
| 1424090_at   | <i>Sdcbp2</i>        | syndecan binding protein (syntenin) 2                                                                                  | -2.52 |
| 1455342_at   | <i>A230083H22Rik</i> | RIKEN cDNA A230083H22 gene                                                                                             | -2.51 |
| 1453571_at   | <i>Depdc6</i>        | DEP domain containing 6                                                                                                | -2.51 |
| 1434301_at   | <i>D330050I23Rik</i> | RIKEN cDNA D330050I23 gene                                                                                             | -2.51 |
| 1428859_at   | <i>Paox</i>          | polyamine oxidase (exo-N4-amino)                                                                                       | -2.50 |
| 1441975_at   | <i>Acpp</i>          | acid phosphatase, prostate                                                                                             | -2.50 |
| 1452384_at   | <i>Enpp3</i>         | ectonucleotide<br>pyrophosphatase/phosphodiesterase 3                                                                  | -2.50 |
| 1456981_at   | <i>Tmc7</i>          | transmembrane channel-like gene family 7                                                                               | -2.50 |
| 1450404_at   | <i>Slc23a1</i>       | solute carrier family 23 (nucleobase<br>transporters), member 1                                                        | -2.50 |
| 1439148_a_at | <i>Pfkl</i>          | phosphofructokinase, liver, B-type                                                                                     | -2.49 |
| 1419494_a_at | <i>Tpd52</i>         | tumor protein D52                                                                                                      | -2.49 |
| 1448110_at   | <i>Sema4a</i>        | sema domain, immunoglobulin domain (Ig),<br>transmembrane domain (TM) and short<br>cytoplasmic domain, (semaphorin) 4A | -2.49 |
| 1426560_a_at | <i>Npnt</i>          | nephronectin                                                                                                           | -2.49 |
| 1424951_at   | <i>Baiap2l1</i>      | BAI1-associated protein 2-like 1                                                                                       | -2.49 |
| 1424383_at   | <i>Tmem51</i>        | transmembrane protein 51                                                                                               | -2.49 |
| 1459876_at   | <i>Npr1</i>          | Natriuretic peptide receptor 1                                                                                         | -2.49 |
| 1449369_at   | <i>Tmprss2</i>       | transmembrane protease, serine 2                                                                                       | -2.49 |
| 1426332_a_at | <i>Cldn3</i>         | claudin 3                                                                                                              | -2.49 |
| 1451660_a_at | <i>Hoxb6</i>         | homeo box B6                                                                                                           | -2.48 |
| 1418888_a_at | <i>Sepx1</i>         | selenoprotein X 1                                                                                                      | -2.48 |
| 1419493_a_at | <i>Tpd52</i>         | tumor protein D52                                                                                                      | -2.48 |
| 1426731_at   | <i>Des</i>           | desmin                                                                                                                 | -2.48 |
| 1439293_at   | <i>C130047D21Rik</i> | RIKEN cDNA C130047D21 gene                                                                                             | -2.48 |
| 1434815_a_at | <i>Mapkapk3</i>      | mitogen-activated protein kinase-activated<br>protein kinase 3                                                         | -2.48 |
| 1424638_at   | <i>Cdkn1a</i>        | cyclin-dependent kinase inhibitor 1A (P21)                                                                             | -2.48 |
| 1429226_at   | <i>2310014F06Rik</i> | RIKEN cDNA 2310014F06 gene                                                                                             | -2.48 |
| 1451601_a_at | <i>BC011467</i>      | cDNA sequence BC011467                                                                                                 | -2.47 |
| 1452716_at   | <i>5730469M10Rik</i> | RIKEN cDNA 5730469M10 gene                                                                                             | -2.47 |
| 1436200_at   | <i>Lonrf3</i>        | LON peptidase N-terminal domain and ring<br>finger 3                                                                   | -2.47 |
| 1428622_at   | <i>Depdc6</i>        | DEP domain containing 6                                                                                                | -2.47 |
| 1445600_at   | <i>Igf1r</i>         | Insulin-like growth factor I receptor                                                                                  | -2.47 |
| 1455002_at   | <i>Ptp4a1</i>        | protein tyrosine phosphatase 4a1                                                                                       | -2.47 |
| 1426301_at   | <i>Alcam</i>         | activated leukocyte cell adhesion molecule                                                                             | -2.46 |
| 1426632_at   | <i>Kctd14</i>        | potassium channel tetramerisation domain<br>containing 14                                                              | -2.46 |
| 1431805_a_at | <i>Rhpn2</i>         | rhopilin, Rho GTPase binding protein 2                                                                                 | -2.46 |
| 1422721_at   | <i>Tnk1</i>          | tyrosine kinase, non-receptor, 1                                                                                       | -2.46 |
| 1418374_at   | <i>Fxyd3</i>         | FXYD domain-containing ion transport<br>regulator 3                                                                    | -2.46 |
| 1440262_at   | ---                  | ---                                                                                                                    | -2.46 |
| 1435510_at   | <i>Ppm1h</i>         | protein phosphatase 1H (PP2C domain<br>containing)                                                                     | -2.46 |
| 1455477_s_at | <i>Pdzk1ip1</i>      | PDZK1 interacting protein 1                                                                                            | -2.46 |
| 1429321_at   | <i>Rnf149</i>        | ring finger protein 149                                                                                                | -2.45 |
| 1427411_s_at | <i>Dleu2</i>         | deleted in lymphocytic leukemia, 2                                                                                     | -2.45 |
| 1427427_at   | <i>Ryr3</i>          | ryanodine receptor 3                                                                                                   | -2.45 |

|              |                      |                                                                                         |       |
|--------------|----------------------|-----------------------------------------------------------------------------------------|-------|
| 1436413_at   | <i>Frk</i>           | fyn-related kinase                                                                      | -2.45 |
| 1455686_at   | ---                  | ---                                                                                     | -2.45 |
| 1426914_at   | <i>Marveld2</i>      | MARVEL (membrane-associating) domain containing 2                                       | -2.45 |
| 1416760_at   | <i>Galnt1</i>        | UDP-N-acetyl-alpha-D-galactosamine:polypeptide N-acetylgalactosaminyltransferase-like 1 | -2.45 |
| 1455454_at   | <i>Akr1c19</i>       | aldo-keto reductase family 1, member C19                                                | -2.44 |
| 1454858_x_at | <i>Mettl7a</i>       | methyltransferase like 7A                                                               | -2.44 |
| 1456229_at   | <i>Hoxb3</i>         | homeo box B3                                                                            | -2.44 |
| 1451610_at   | <i>BC024561</i>      | cDNA sequence BC024561                                                                  | -2.44 |
| 1423174_a_at | <i>Pard6b</i>        | par-6 (partitioning defective 6) homolog beta (C. elegans)                              | -2.44 |
| 1454681_at   | <i>Rbm35a</i>        | RNA binding motif protein 35A                                                           | -2.43 |
| 1427008_at   | <i>Rnf43</i>         | ring finger protein 43                                                                  | -2.43 |
| 1418815_at   | <i>Cdh2</i>          | cadherin 2                                                                              | -2.43 |
| 1434273_at   | <i>A830073O21Rik</i> | RIKEN cDNA A830073O21 gene                                                              | -2.42 |
| 1426908_at   | <i>Galnt7</i>        | UDP-N-acetyl-alpha-D-galactosamine:polypeptide N-acetylgalactosaminyltransferase 7      | -2.42 |
| 1434447_at   | <i>AI838057</i>      | expressed sequence AI838057                                                             | -2.42 |
| 1435951_at   | <i>Grip1</i>         | glutamate receptor interacting protein 1                                                | -2.41 |
| 1418488_s_at | <i>Ripk4</i>         | receptor-interacting serine-threonine kinase 4                                          | -2.41 |
| 1430622_at   | <i>4833423F13Rik</i> | RIKEN cDNA 4833423F13 gene                                                              | -2.40 |
| 1453377_at   | <i>Sh2d4a</i>        | SH2 domain containing 4A                                                                | -2.40 |
| 1438945_x_at | <i>Gja1</i>          | gap junction membrane channel protein alpha 1                                           | -2.40 |
| 1425464_at   | <i>Gata6</i>         | GATA binding protein 6                                                                  | -2.40 |
| 1422479_at   | <i>Acss2</i>         | acyl-CoA synthetase short-chain family member 2                                         | -2.39 |
| 1427046_at   | <i>Grhl2</i>         | grainyhead-like 2 (Drosophila)                                                          | -2.39 |
| 1452273_at   | <i>AA409316</i>      | expressed sequence AA409316                                                             | -2.39 |
| 1455825_s_at | <i>Ln timer</i>      | ligand of numb-protein X 1                                                              | -2.39 |
| 1420502_at   | <i>Sat1</i>          | spermidine/spermine N1-acetyl transferase 1                                             | -2.39 |
| 1437466_at   | <i>Alcam</i>         | activated leukocyte cell adhesion molecule                                              | -2.38 |
| 1418122_at   | <i>Myh11</i>         | myosin, heavy polypeptide 11, smooth muscle                                             | -2.38 |
| 1426942_at   | <i>Aim1</i>          | absent in melanoma 1                                                                    | -2.38 |
| 1451255_at   | <i>Lsr</i>           | lipolysis stimulated lipoprotein receptor                                               | -2.37 |
| 1435657_at   | <i>AI425999</i>      | expressed sequence AI425999                                                             | -2.37 |
| 1428285_at   | <i>8430427H17Rik</i> | RIKEN cDNA 8430427H17 gene                                                              | -2.37 |
| 1435541_at   | <i>Btc</i>           | betacellulin, epidermal growth factor family member                                     | -2.37 |
| 1419298_at   | <i>Pon3</i>          | paraoxonase 3                                                                           | -2.36 |

|              |                                                                                                                                                                   |                                                                                                                                                                                                                                                                                                                                                                                                                                                                     |       |
|--------------|-------------------------------------------------------------------------------------------------------------------------------------------------------------------|---------------------------------------------------------------------------------------------------------------------------------------------------------------------------------------------------------------------------------------------------------------------------------------------------------------------------------------------------------------------------------------------------------------------------------------------------------------------|-------|
| 1426261_s_at | <i>Ugt1a2</i> ///<br><i>Ugt1a6a</i> ///<br><i>Ugt1a10</i> ///<br><i>Ugt1a7c</i> ///<br><i>Ugt1a5</i> /// <i>Ugt1a9</i><br>/// <i>Ugt1a6b</i> ///<br><i>Ugt1a1</i> | UDP glucuronosyltransferase 1 family, polypeptide A2 /// UDP glucuronosyltransferase 1 family, polypeptide A6A /// UDP glycosyltransferase 1 family, polypeptide A10 /// UDP glucuronosyltransferase 1 family, polypeptide A7C /// UDP glucuronosyltransferase 1 family, polypeptide A5 /// UDP glucuronosyltransferase 1 family, polypeptide A9 /// UDP glucuronosyltransferase 1 family, polypeptide A6B /// UDP glucuronosyltransferase 1 family, polypeptide A1 | -2.36 |
| 1422073_a_at | <i>Celsr2</i>                                                                                                                                                     | cadherin EGF LAG seven-pass G-type receptor 2                                                                                                                                                                                                                                                                                                                                                                                                                       | -2.36 |
| 1436345_at   | <i>5730559C18Rik</i>                                                                                                                                              | RIKEN cDNA 5730559C18 gene                                                                                                                                                                                                                                                                                                                                                                                                                                          | -2.36 |
| 1450769_s_at | <i>Stard5</i>                                                                                                                                                     | StAR-related lipid transfer (START) domain containing 5                                                                                                                                                                                                                                                                                                                                                                                                             | -2.36 |
| 1458900_at   | <i>Slc24a3</i>                                                                                                                                                    | Solute carrier family 24 (sodium/potassium/calcium exchanger), member 3                                                                                                                                                                                                                                                                                                                                                                                             | -2.36 |
| 1421424_a_at | <i>Anpep</i>                                                                                                                                                      | alanyl (membrane) aminopeptidase                                                                                                                                                                                                                                                                                                                                                                                                                                    | -2.36 |
| 1438408_at   | <i>Ankrd56</i>                                                                                                                                                    | ankyrin repeat domain 56                                                                                                                                                                                                                                                                                                                                                                                                                                            | -2.35 |
| 1434489_at   | <i>Elmo3</i>                                                                                                                                                      | engulfment and cell motility 3, ced-12 homolog (C. elegans)                                                                                                                                                                                                                                                                                                                                                                                                         | -2.35 |
| 1435336_at   | <i>Celsr2</i>                                                                                                                                                     | cadherin EGF LAG seven-pass G-type receptor 2                                                                                                                                                                                                                                                                                                                                                                                                                       | -2.35 |
| 1443722_at   | <i>6030419C18Rik</i>                                                                                                                                              | RIKEN cDNA 6030419C18 gene                                                                                                                                                                                                                                                                                                                                                                                                                                          | -2.35 |
| 1448598_at   | <i>Mmp17</i>                                                                                                                                                      | matrix metalloproteinase 17                                                                                                                                                                                                                                                                                                                                                                                                                                         | -2.35 |
| 1455399_at   | <i>Cnksr1</i> ///<br><i>LOC637116</i>                                                                                                                             | connector enhancer of kinase suppressor of Ras 1 /// similar to connector enhancer of kinase suppressor of Ras 1                                                                                                                                                                                                                                                                                                                                                    | -2.34 |
| 1434062_at   | <i>Rabgap1l</i>                                                                                                                                                   | RAB GTPase activating protein 1-like                                                                                                                                                                                                                                                                                                                                                                                                                                | -2.34 |
| 1443029_at   | <i>Ppfibp1</i>                                                                                                                                                    | PTPRF interacting protein, binding protein 1 (liprin beta 1)                                                                                                                                                                                                                                                                                                                                                                                                        | -2.34 |
| 1460698_a_at | <i>Sec11l3</i>                                                                                                                                                    | Sec11-like 3 (S. cerevisiae)                                                                                                                                                                                                                                                                                                                                                                                                                                        | -2.34 |
| 1453365_at   | <i>Rabgap1l</i>                                                                                                                                                   | RAB GTPase activating protein 1-like                                                                                                                                                                                                                                                                                                                                                                                                                                | -2.34 |
| 1419194_s_at | <i>Gmfg</i>                                                                                                                                                       | glia maturation factor, gamma                                                                                                                                                                                                                                                                                                                                                                                                                                       | -2.34 |
| 1434773_a_at | <i>Slc2a1</i>                                                                                                                                                     | solute carrier family 2 (facilitated glucose transporter), member 1                                                                                                                                                                                                                                                                                                                                                                                                 | -2.34 |
| 1421267_a_at | <i>Cited2</i>                                                                                                                                                     | Cbp/p300-interacting transactivator, with Glu/Asp-rich carboxy-terminal domain, 2                                                                                                                                                                                                                                                                                                                                                                                   | -2.34 |
| 1458114_at   | <i>Samd12</i>                                                                                                                                                     | sterile alpha motif domain containing 12                                                                                                                                                                                                                                                                                                                                                                                                                            | -2.33 |
| 1437992_x_at | <i>Gja1</i>                                                                                                                                                       | gap junction membrane channel protein alpha 1                                                                                                                                                                                                                                                                                                                                                                                                                       | -2.33 |
| 1451538_at   | <i>Sox9</i>                                                                                                                                                       | SRY-box containing gene 9                                                                                                                                                                                                                                                                                                                                                                                                                                           | -2.33 |
| 1455030_at   | <i>Ptpnj</i>                                                                                                                                                      | protein tyrosine phosphatase, receptor type, J                                                                                                                                                                                                                                                                                                                                                                                                                      | -2.32 |
| 1451574_at   | <i>Bcl9</i>                                                                                                                                                       | B-cell CLL/lymphoma 9                                                                                                                                                                                                                                                                                                                                                                                                                                               | -2.32 |
| 1430942_at   | <i>8430437O03Rik</i>                                                                                                                                              | RIKEN cDNA 8430437O03 gene                                                                                                                                                                                                                                                                                                                                                                                                                                          | -2.31 |

|              |                               |                                                                           |       |
|--------------|-------------------------------|---------------------------------------------------------------------------|-------|
| 1416831_at   | <i>Neu1</i>                   | neuraminidase 1                                                           | -2.31 |
| 1423938_at   | <i>Llg12</i>                  | lethal giant larvae homolog 2 (Drosophila)                                | -2.31 |
| 1455737_at   | <i>C030002B11Rik</i>          | RIKEN cDNA C030002B11 gene                                                | -2.31 |
| 1436008_at   | <i>Tpd52</i>                  | Tumor protein D52                                                         | -2.31 |
| 1423909_at   | <i>0610011104Rik</i>          | RIKEN cDNA 0610011104 gene                                                | -2.30 |
| 1418412_at   | <i>Tpd52l1</i>                | tumor protein D52-like 1                                                  | -2.30 |
| 1442051_at   | <i>Hist2h3c1</i>              | histone 2, H3c1                                                           | -2.30 |
| 1430786_at   | <i>1110002E22Rik</i>          | RIKEN cDNA 1110002E22 gene                                                | -2.30 |
| 1426599_a_at | <i>Slc2a1</i>                 | solute carrier family 2 (facilitated glucose transporter), member 1       | -2.29 |
| 1422293_a_at | <i>Kctd1</i>                  | potassium channel tetramerisation domain containing 1                     | -2.29 |
| 1445827_at   | <i>Prkcbp1</i>                | Protein kinase C binding protein 1                                        | -2.29 |
| 1416361_a_at | <i>Dync1i1</i>                | dynein cytoplasmic 1 intermediate chain 1                                 | -2.29 |
| 1418925_at   | <i>Celsr1</i>                 | cadherin EGF LAG seven-pass G-type receptor 1                             | -2.29 |
| 1452124_at   | <i>Ank3 /// 2900054D09Rik</i> | ankyrin 3, epithelial /// RIKEN cDNA 2900054D09 gene                      | -2.29 |
| 1460341_at   | <i>Plekhb2</i>                | pleckstrin homology domain containing, family B (evectins) member 2       | -2.29 |
| 1419322_at   | <i>Fgd6</i>                   | FYVE, RhoGEF and PH domain containing 6                                   | -2.28 |
| 1448147_at   | <i>Tnfrsf19</i>               | tumor necrosis factor receptor superfamily, member 19                     | -2.28 |
| 1424477_at   | <i>BC019731</i>               | cDNA sequence BC019731                                                    | -2.28 |
| 1445519_at   | <i>Kcns3</i>                  | potassium voltage-gated channel, delayed-rectifier, subfamily S, member 3 | -2.27 |
| 1438759_x_at | ---                           | ---                                                                       | -2.27 |
| 1456956_at   | <i>Zfpn1a2</i>                | zinc finger protein, subfamily 1A, 2 (Helios)                             | -2.27 |
| 1436181_at   | <i>Ddef2</i>                  | development and differentiation enhancing factor 2                        | -2.27 |
| 1456401_at   | <i>Cacnb2</i>                 | calcium channel, voltage-dependent, beta 2 subunit                        | -2.27 |
| 1448261_at   | <i>Cdh1</i>                   | cadherin 1                                                                | -2.27 |
| 1452469_a_at | <i>Smtn</i>                   | smoothelin                                                                | -2.26 |
| 1434036_at   | <i>Mtss1</i>                  | metastasis suppressor 1                                                   | -2.26 |
| 1427261_at   | <i>Wwc1</i>                   | WW, C2 and coiled-coil domain containing 1                                | -2.26 |
| 1429284_at   | <i>8430436F23Rik</i>          | RIKEN cDNA 8430436F23 gene                                                | -2.25 |
| 1439078_at   | <i>Klhl4</i>                  | kelch-like 4 (Drosophila)                                                 | -2.25 |
| 1418895_at   | <i>Scap2</i>                  | src family associated phosphoprotein 2                                    | -2.25 |
| 1428614_at   | <i>Ldhd</i>                   | lactate dehydrogenase D                                                   | -2.25 |
| 1422704_at   | <i>Gyk</i>                    | glycerol kinase                                                           | -2.25 |
| 1450918_s_at | <i>Src</i>                    | Rous sarcoma oncogene                                                     | -2.25 |
| 1438415_s_at | <i>Yipf2</i>                  | Yip1 domain family, member 2                                              | -2.25 |
| 1440440_at   | ---                           | ---                                                                       | -2.25 |
| 1438231_at   | <i>Foxp2</i>                  | forkhead box P2                                                           | -2.24 |
| 1447892_at   | ---                           | ---                                                                       | -2.24 |
| 1420008_s_at | ---                           | ---                                                                       | -2.24 |
| 1437872_at   | <i>AB112350</i>               | cDNA sequence AB112350                                                    | -2.24 |
| 1440220_at   | <i>AI503564</i>               | expressed sequence AI503564                                               | -2.24 |
| 1428573_at   | <i>Chn2</i>                   | chimerin (chimaerin) 2                                                    | -2.23 |

|              |                      |                                                                                |       |
|--------------|----------------------|--------------------------------------------------------------------------------|-------|
| 1425159_at   | <i>Golt1a</i>        | golgi transport 1 homolog A ( <i>S. cerevisiae</i> )                           | -2.23 |
| 1440097_at   | <i>Mirg</i>          | miRNA containing gene                                                          | -2.23 |
| 1439764_s_at | <i>Igf2bp2</i>       | insulin-like growth factor 2 mRNA binding protein 2                            | -2.23 |
| 1455684_at   | <i>Map3k9</i>        | mitogen-activated protein kinase kinase kinase 9                               | -2.23 |
| 1430353_at   | <i>Glis3</i>         | GLIS family zinc finger 3                                                      | -2.23 |
| 1433725_at   | <i>Acvr1b</i>        | activin A receptor, type 1B                                                    | -2.23 |
| 1453004_at   | <i>3110004L20Rik</i> | RIKEN cDNA 3110004L20 gene                                                     | -2.22 |
| 1418980_a_at | <i>Cnp1</i>          | cyclic nucleotide phosphodiesterase 1                                          | -2.22 |
| 1417392_a_at | <i>Slc7a7</i>        | solute carrier family 7 (cationic amino acid transporter, y+ system), member 7 | -2.22 |
| 1421362_a_at | <i>Frk</i>           | fyn-related kinase                                                             | -2.22 |
| 1422707_at   | <i>Pik3cg</i>        | phosphoinositide-3-kinase, catalytic, gamma polypeptide                        | -2.22 |
| 1417297_at   | <i>Itpr3</i>         | inositol 1,4,5-triphosphate receptor 3                                         | -2.22 |
| 1435494_s_at | <i>Dsp</i>           | desmoplakin                                                                    | -2.22 |
| 1448239_at   | <i>Hmox1</i>         | heme oxygenase (decycling) 1                                                   | -2.21 |
| 1419570_at   | <i>Slc28a3</i>       | solute carrier family 28 (sodium-coupled nucleoside transporter), member 3     | -2.21 |
| 1434193_at   | <i>Zmym6</i>         | zinc finger, MYM-type 6                                                        | -2.21 |
| 1449799_s_at | <i>Pkp2</i>          | plakophilin 2                                                                  | -2.21 |
| 1449519_at   | <i>Gadd45a</i>       | growth arrest and DNA-damage-inducible 45 alpha                                | -2.21 |
| 1429062_at   | <i>Kif16b</i>        | kinesin family member 16B                                                      | -2.21 |
| 1437502_x_at | <i>Cd24a</i>         | CD24a antigen                                                                  | -2.20 |
| 1428443_a_at | <i>Rap1gap</i>       | Rap1 GTPase-activating protein                                                 | -2.20 |
| 1449198_a_at | <i>St3gal5</i>       | ST3 beta-galactoside alpha-2,3-sialyltransferase 5                             | -2.20 |
| 1429870_at   | <i>C630040K21Rik</i> | RIKEN cDNA C630040K21 gene                                                     | -2.20 |
| 1427028_at   | <i>Lgr6</i>          | leucine-rich repeat-containing G protein-coupled receptor 6                    | -2.20 |
| 1424826_s_at | <i>Mtss1</i>         | metastasis suppressor 1                                                        | -2.20 |
| 1435446_a_at | <i>Chpt1</i>         | choline phosphotransferase 1                                                   | -2.19 |
| 1449544_a_at | <i>Kcnh2</i>         | potassium voltage-gated channel, subfamily H (eag-related), member 2           | -2.19 |
| 1416410_at   | <i>Pafah1b3</i>      | platelet-activating factor acetylhydrolase, isoform 1b, alpha1 subunit         | -2.19 |
| 1427386_at   | <i>Arhgef16</i>      | Rho guanine nucleotide exchange factor (GEF) 16                                | -2.19 |
| 1436199_at   | ---                  | ---                                                                            | -2.19 |
| 1417689_a_at | <i>Pdzk1ip1</i>      | PDZK1 interacting protein 1                                                    | -2.19 |
| 1428306_at   | <i>Ddit4</i>         | DNA-damage-inducible transcript 4                                              | -2.19 |
| 1424127_at   | <i>Eya2</i>          | eyes absent 2 homolog ( <i>Drosophila</i> )                                    | -2.19 |
| 1451210_at   | <i>Ppap2c</i>        | phosphatidic acid phosphatase type 2c                                          | -2.18 |
| 1418208_at   | <i>Pax8</i>          | paired box gene 8                                                              | -2.18 |
| 1430115_at   | <i>4833413E03Rik</i> | RIKEN cDNA 4833413E03 gene                                                     | -2.18 |
| 1453418_at   | <i>Col24a1</i>       | procollagen, type XXIV, alpha 1                                                | -2.18 |
| 1434944_at   | <i>Dmpk</i>          | dystrophia myotonica-protein kinase                                            | -2.18 |
| 1448816_at   | <i>Ptgis</i>         | prostaglandin I2 (prostacyclin) synthase                                       | -2.18 |
| 1422508_at   | <i>Atp6v1a</i>       | ATPase, H+ transporting, lysosomal V1 subunit A                                | -2.17 |

|              |                                                                                                                                                                   |                                                                                                                                                                                                                                                                                                                                                                                                                                                                     |       |
|--------------|-------------------------------------------------------------------------------------------------------------------------------------------------------------------|---------------------------------------------------------------------------------------------------------------------------------------------------------------------------------------------------------------------------------------------------------------------------------------------------------------------------------------------------------------------------------------------------------------------------------------------------------------------|-------|
| 1429664_at   | <i>Cdkl1</i>                                                                                                                                                      | cyclin-dependent kinase-like 1 (CDC2-related kinase)                                                                                                                                                                                                                                                                                                                                                                                                                | -2.17 |
| 1417507_at   | <i>Cyb561</i>                                                                                                                                                     | cytochrome b-561                                                                                                                                                                                                                                                                                                                                                                                                                                                    | -2.17 |
| 1447685_x_at | <i>Ets2</i>                                                                                                                                                       | E26 avian leukemia oncogene 2, 3' domain                                                                                                                                                                                                                                                                                                                                                                                                                            | -2.17 |
| 1435083_at   | <i>Ctxn1</i>                                                                                                                                                      | cortexin 1                                                                                                                                                                                                                                                                                                                                                                                                                                                          | -2.17 |
| 1420810_at   | <i>1500003O03Rik</i>                                                                                                                                              | RIKEN cDNA 1500003O03 gene                                                                                                                                                                                                                                                                                                                                                                                                                                          | -2.17 |
| 1434025_at   | ---                                                                                                                                                               | ---                                                                                                                                                                                                                                                                                                                                                                                                                                                                 | -2.16 |
| 1449464_at   | <i>Kcnq1</i>                                                                                                                                                      | potassium voltage-gated channel, subfamily Q, member 1                                                                                                                                                                                                                                                                                                                                                                                                              | -2.16 |
| 1425163_at   | <i>AI661453</i>                                                                                                                                                   | expressed sequence AI661453                                                                                                                                                                                                                                                                                                                                                                                                                                         | -2.16 |
| 1455324_at   | <i>LOC433022</i>                                                                                                                                                  | hypothetical LOC433022                                                                                                                                                                                                                                                                                                                                                                                                                                              | -2.16 |
| 1415927_at   | <i>Actc1</i>                                                                                                                                                      | actin, alpha, cardiac                                                                                                                                                                                                                                                                                                                                                                                                                                               | -2.16 |
| 1436032_at   | ---                                                                                                                                                               | Bone marrow macrophage cDNA, RIKEN full-length enriched library, clone:I830083F22 product:unclassifiable, full insert sequence                                                                                                                                                                                                                                                                                                                                      | -2.16 |
| 1424783_a_at | <i>Ugt1a2</i> ///<br><i>Ugt1a6a</i> ///<br><i>Ugt1a10</i> ///<br><i>Ugt1a7c</i> ///<br><i>Ugt1a5</i> /// <i>Ugt1a9</i> ///<br><i>Ugt1a6b</i> ///<br><i>Ugt1a1</i> | UDP glucuronosyltransferase 1 family, polypeptide A2 /// UDP glucuronosyltransferase 1 family, polypeptide A6A /// UDP glycosyltransferase 1 family, polypeptide A10 /// UDP glucuronosyltransferase 1 family, polypeptide A7C /// UDP glucuronosyltransferase 1 family, polypeptide A5 /// UDP glucuronosyltransferase 1 family, polypeptide A9 /// UDP glucuronosyltransferase 1 family, polypeptide A6B /// UDP glucuronosyltransferase 1 family, polypeptide A1 | -2.16 |
| 1454746_at   | <i>Plekhm1</i>                                                                                                                                                    | pleckstrin homology domain containing, family M (with RUN domain) member 1                                                                                                                                                                                                                                                                                                                                                                                          | -2.15 |
| 1453069_at   | <i>Pik3cb</i>                                                                                                                                                     | phosphatidylinositol 3-kinase, catalytic, beta polypeptide                                                                                                                                                                                                                                                                                                                                                                                                          | -2.15 |
| 1434526_at   | <i>Abhd7</i>                                                                                                                                                      | abhydrolase domain containing 7                                                                                                                                                                                                                                                                                                                                                                                                                                     | -2.15 |
| 1443906_at   | <i>Cd55</i>                                                                                                                                                       | CD55 antigen                                                                                                                                                                                                                                                                                                                                                                                                                                                        | -2.15 |
| 1438018_at   | <i>Hook1</i>                                                                                                                                                      | hook homolog 1 ( <i>Drosophila</i> )                                                                                                                                                                                                                                                                                                                                                                                                                                | -2.15 |
| 1443157_at   | <i>Glis3</i>                                                                                                                                                      | GLIS family zinc finger 3                                                                                                                                                                                                                                                                                                                                                                                                                                           | -2.14 |
| 1444408_at   | <i>B130040O20Rik</i>                                                                                                                                              | RIKEN cDNA B130040O20 gene                                                                                                                                                                                                                                                                                                                                                                                                                                          | -2.14 |
| 1453318_at   | <i>Tmem102</i>                                                                                                                                                    | transmembrane protein 102                                                                                                                                                                                                                                                                                                                                                                                                                                           | -2.14 |
| 1449252_at   | <i>9030611O19Rik</i>                                                                                                                                              | RIKEN cDNA 9030611O19 gene                                                                                                                                                                                                                                                                                                                                                                                                                                          | -2.14 |
| 1442077_at   | <i>2310076G05Rik</i>                                                                                                                                              | RIKEN cDNA 2310076G05 gene                                                                                                                                                                                                                                                                                                                                                                                                                                          | -2.13 |
| 1456146_at   | <i>Osbpl10</i>                                                                                                                                                    | oxysterol binding protein-like 10                                                                                                                                                                                                                                                                                                                                                                                                                                   | -2.13 |

|              |                                                                                                                                                                                                                                                                                                                                                                  |                                                                                                                                                                                                                                                                                                                                                                                                                                                                                                             |       |
|--------------|------------------------------------------------------------------------------------------------------------------------------------------------------------------------------------------------------------------------------------------------------------------------------------------------------------------------------------------------------------------|-------------------------------------------------------------------------------------------------------------------------------------------------------------------------------------------------------------------------------------------------------------------------------------------------------------------------------------------------------------------------------------------------------------------------------------------------------------------------------------------------------------|-------|
| 1426260_a_at | <i>Ugt1a2</i> ///<br><i>Ugt1a6a</i> ///<br><i>Ugt1a10</i> ///<br><i>Ugt1a7c</i> ///<br><i>Ugt1a5</i> /// <i>Ugt1a9</i> ///<br><i>Ugt1a6b</i> ///<br><i>Ugt1a1</i>                                                                                                                                                                                                | UDP glucuronosyltransferase 1 family, polypeptide A2 /// UDP glucuronosyltransferase 1 family, polypeptide A6A /// UDP glycosyltransferase 1 family, polypeptide A10 /// UDP glucuronosyltransferase 1 family, polypeptide A7C /// UDP glucuronosyltransferase 1 family, polypeptide A5 /// UDP glucuronosyltransferase 1 family, polypeptide A9 /// UDP glucuronosyltransferase 1 family, polypeptide A6B /// UDP glucuronosyltransferase 1 family, polypeptide A1                                         | -2.13 |
| 1423071_x_at | <i>LOC270335</i> ///<br><i>LOC434328</i> ///<br><i>LOC544983</i> ///<br><i>LOC545175</i> ///<br><i>LOC619711</i> ///<br><i>LOC622782</i> ///<br><i>LOC623857</i> ///<br><i>LOC624831</i> ///<br><i>LOC665837</i> ///<br><i>LOC666017</i> ///<br><i>LOC666200</i> ///<br><i>LOC666464</i> ///<br><i>LOC668524</i> ///<br><i>LOC670117</i> ///<br><i>LOC670242</i> | hypothetical gene supported by BC019681; BC027236 /// hypothetical LOC434328 /// hypothetical LOC544983 /// hypothetical LOC545175 /// hypothetical LOC619711 /// hypothetical LOC622782 /// hypothetical protein LOC623857 /// hypothetical LOC624831 /// hypothetical protein LOC665837 /// hypothetical protein LOC666017 /// hypothetical protein LOC666200 /// hypothetical protein LOC666464 /// hypothetical protein LOC668524 /// hypothetical protein LOC670117 /// hypothetical protein LOC670242 | -2.13 |
| 1451546_s_at | <i>Tmem40</i>                                                                                                                                                                                                                                                                                                                                                    | transmembrane protein 40                                                                                                                                                                                                                                                                                                                                                                                                                                                                                    | -2.13 |
| 1441579_at   | <i>Dmrta1</i>                                                                                                                                                                                                                                                                                                                                                    | doublesex and mab-3 related transcription factor like family A1                                                                                                                                                                                                                                                                                                                                                                                                                                             | -2.13 |
| 1422272_at   | <i>Phxr4</i>                                                                                                                                                                                                                                                                                                                                                     | per-hexamer repeat gene 4                                                                                                                                                                                                                                                                                                                                                                                                                                                                                   | -2.13 |
| 1425108_a_at | <i>BC004728</i>                                                                                                                                                                                                                                                                                                                                                  | cDNA sequence BC004728                                                                                                                                                                                                                                                                                                                                                                                                                                                                                      | -2.13 |
| 1417901_a_at | <i>Ica1</i>                                                                                                                                                                                                                                                                                                                                                      | islet cell autoantigen 1                                                                                                                                                                                                                                                                                                                                                                                                                                                                                    | -2.12 |
| 1456103_at   | <i>Pml</i>                                                                                                                                                                                                                                                                                                                                                       | promyelocytic leukemia                                                                                                                                                                                                                                                                                                                                                                                                                                                                                      | -2.11 |
| 1423619_at   | <i>Rasd1</i>                                                                                                                                                                                                                                                                                                                                                     | RAS, dexamethasone-induced 1                                                                                                                                                                                                                                                                                                                                                                                                                                                                                | -2.11 |
| 1429063_s_at | <i>Kif16b</i>                                                                                                                                                                                                                                                                                                                                                    | kinesin family member 16B                                                                                                                                                                                                                                                                                                                                                                                                                                                                                   | -2.11 |
| 1429183_at   | <i>Pkp2</i>                                                                                                                                                                                                                                                                                                                                                      | plakophilin 2                                                                                                                                                                                                                                                                                                                                                                                                                                                                                               | -2.11 |
| 1439159_at   | ---                                                                                                                                                                                                                                                                                                                                                              | ---                                                                                                                                                                                                                                                                                                                                                                                                                                                                                                         | -2.11 |
| 1434442_at   | <i>D5Erd593e</i>                                                                                                                                                                                                                                                                                                                                                 | DNA segment, Chr 5, ERATO Doi 593, expressed                                                                                                                                                                                                                                                                                                                                                                                                                                                                | -2.11 |
| 1424578_at   | <i>Aradc1</i>                                                                                                                                                                                                                                                                                                                                                    | arrestin domain containing 1                                                                                                                                                                                                                                                                                                                                                                                                                                                                                | -2.11 |
| 1437494_at   | <i>Mapkapk3</i>                                                                                                                                                                                                                                                                                                                                                  | mitogen-activated protein kinase-activated protein kinase 3                                                                                                                                                                                                                                                                                                                                                                                                                                                 | -2.11 |
| 1416627_at   | <i>Spint1</i>                                                                                                                                                                                                                                                                                                                                                    | serine protease inhibitor, Kunitz type 1                                                                                                                                                                                                                                                                                                                                                                                                                                                                    | -2.10 |
| 1435549_at   | <i>Trpm4</i>                                                                                                                                                                                                                                                                                                                                                     | transient receptor potential cation channel, subfamily M, member 4                                                                                                                                                                                                                                                                                                                                                                                                                                          | -2.10 |
| 1434628_a_at | <i>Rhpn2</i>                                                                                                                                                                                                                                                                                                                                                     | rhopilin, Rho GTPase binding protein 2                                                                                                                                                                                                                                                                                                                                                                                                                                                                      | -2.10 |
| 1423686_a_at | <i>Prr13</i>                                                                                                                                                                                                                                                                                                                                                     | proline rich 13                                                                                                                                                                                                                                                                                                                                                                                                                                                                                             | -2.10 |
| 1420630_at   | <i>8430419L09Rik</i>                                                                                                                                                                                                                                                                                                                                             | RIKEN cDNA 8430419L09 gene                                                                                                                                                                                                                                                                                                                                                                                                                                                                                  | -2.10 |

|              |                        |                                                                                                                           |       |
|--------------|------------------------|---------------------------------------------------------------------------------------------------------------------------|-------|
| 1439523_at   | D330027G24Rik          | RIKEN cDNA D330027G24 gene                                                                                                | -2.09 |
| 1415936_at   | Bcar3                  | breast cancer anti-estrogen resistance 3                                                                                  | -2.09 |
| 1429144_at   | Prei4                  | preimplantation protein 4                                                                                                 | -2.09 |
| 1428373_at   | Ihpk2                  | inositol hexaphosphate kinase 2                                                                                           | -2.09 |
| 1444632_at   | BC064078               | cDNA sequence BC064078                                                                                                    | -2.08 |
| 1438470_at   | Socs2                  | suppressor of cytokine signaling 2                                                                                        | -2.08 |
| 1436571_at   | ---                    | Adult male testis cDNA, RIKEN full-length enriched library, clone:4930525M22 product:unclassifiable, full insert sequence | -2.08 |
| 1449143_at   | Rtp4                   | receptor transporter protein 4                                                                                            | -2.07 |
| 1416401_at   | Cd82                   | CD82 antigen                                                                                                              | -2.07 |
| 1452872_at   | 2900054D09Rik          | RIKEN cDNA 2900054D09 gene                                                                                                | -2.07 |
| 1451564_at   | Parp14                 | poly (ADP-ribose) polymerase family, member 14                                                                            | -2.07 |
| 1456155_x_at | Fuca1                  | fucosidase, alpha-L- 1, tissue                                                                                            | -2.07 |
| 1421912_at   | Slc23a1                | solute carrier family 23 (nucleobase transporters), member 1                                                              | -2.07 |
| 1451374_x_at | Cklf                   | chemokine-like factor                                                                                                     | -2.06 |
| 1450269_a_at | Pfkl                   | phosphofructokinase, liver, B-type                                                                                        | -2.06 |
| 1435756_at   | Samd10                 | sterile alpha motif domain containing 10                                                                                  | -2.06 |
| 1456210_at   | 5430407P10Rik          | RIKEN cDNA 5430407P10 gene                                                                                                | -2.06 |
| 1426004_a_at | Tgm2                   | transglutaminase 2, C polypeptide                                                                                         | -2.06 |
| 1447911_at   | Tead1                  | TEA domain family member 1                                                                                                | -2.06 |
| 1443736_at   | Tll10                  | Tubulin tyrosine ligase-like family, member 10                                                                            | -2.06 |
| 1423313_at   | Pde7a                  | phosphodiesterase 7A                                                                                                      | -2.05 |
| 1454741_s_at | Tmem164                | transmembrane protein 164                                                                                                 | -2.05 |
| 1443027_at   | 4930523C07Rik          | RIKEN cDNA 4930523C07 gene                                                                                                | -2.05 |
| 1459731_at   | ---                    | ---                                                                                                                       | -2.05 |
| 1423406_at   | Sv2a                   | synaptic vesicle glycoprotein 2 a                                                                                         | -2.05 |
| 1424502_at   | Oit1                   | oncprotein induced transcript 1                                                                                           | -2.05 |
| 1425199_a_at | Epb4.1l5               | erythrocyte protein band 4.1-like 5                                                                                       | -2.04 |
| 1426223_at   | 2810439F02Rik          | RIKEN cDNA 2810439F02 gene                                                                                                | -2.04 |
| 1449357_at   | 2310030G06Rik          | RIKEN cDNA 2310030G06 gene                                                                                                | -2.04 |
| 1427010_s_at | Lama5 ///<br>LOC671909 | laminin, alpha 5 /// similar to Laminin alpha-5 chain precursor                                                           | -2.04 |
| 1418460_at   | Sh3d19                 | SH3 domain protein D19                                                                                                    | -2.03 |
| 1440543_at   | D930036F22Rik          | RIKEN cDNA D930036F22 gene                                                                                                | -2.03 |
| 1459764_x_at | Snx10                  | Sorting nexin 10                                                                                                          | -2.03 |
| 1440560_at   | Ypel2                  | Yippee-like 2 (Drosophila)                                                                                                | -2.03 |
| 1426850_a_at | Map2k6                 | mitogen activated protein kinase kinase 6                                                                                 | -2.03 |
| 1453963_at   | 1600014C23Rik          | RIKEN cDNA 1600014C23 gene                                                                                                | -2.03 |
| 1435493_at   | Dsp                    | desmoplakin                                                                                                               | -2.03 |
| 1452358_at   | Rai2                   | retinoic acid induced 2                                                                                                   | -2.03 |
| 1435334_at   | Ttc7                   | tetratricopeptide repeat domain 7                                                                                         | -2.03 |
| 1419113_at   | Ap1g2                  | adaptor protein complex AP-1, gamma 2 subunit                                                                             | -2.03 |
| 1455901_at   | Chpt1                  | choline phosphotransferase 1                                                                                              | -2.02 |
| 1429725_at   | Atbf1                  | AT motif binding factor 1                                                                                                 | -2.02 |
| 1442358_at   | AA409587               | expressed sequence AA409587                                                                                               | -2.02 |
| 1417500_a_at | Tgm2                   | transglutaminase 2, C polypeptide                                                                                         | -2.02 |
| 1429891_at   | Capsl                  | calcyphosine-like                                                                                                         | -2.01 |



|              |                                                                                     |                                                                                                                                                   |       |
|--------------|-------------------------------------------------------------------------------------|---------------------------------------------------------------------------------------------------------------------------------------------------|-------|
| 1438758_at   | ---                                                                                 | ---                                                                                                                                               | -2.01 |
| 1448169_at   | <i>Krt18</i>                                                                        | keratin 18                                                                                                                                        | -2.01 |
| 1439341_at   | <i>AK220484</i>                                                                     | cDNA sequence AK220484                                                                                                                            | -2.01 |
| 1451499_at   | <i>Cadps2</i>                                                                       | Ca <sup>2+</sup> -dependent activator protein for secretion 2                                                                                     | -2.01 |
| 1417647_at   | <i>Snx5</i>                                                                         | sorting nexin 5                                                                                                                                   | -2.01 |
| 1458409_at   | <i>C86595</i>                                                                       | expressed sequence C86595                                                                                                                         | -2.01 |
| 1459301_at   | <i>Mrg1</i>                                                                         | Myeloid ecotropic viral integration site-related gene 1                                                                                           | -2.01 |
| 1448411_at   | <i>Wfs1</i>                                                                         | Wolfram syndrome 1 homolog (human)                                                                                                                | -2.01 |
| 1434559_at   | <i>Stx3</i>                                                                         | syntaxin 3                                                                                                                                        | -2.00 |
| 1417293_at   | <i>Hs6st1</i>                                                                       | heparan sulfate 6-O-sulfotransferase 1                                                                                                            | -2.00 |
| 1428066_at   | <i>Ccdc120</i>                                                                      | coiled-coil domain containing 120                                                                                                                 | -2.00 |
| 1433604_x_at | <i>Aldoa</i>                                                                        | aldolase 1, A isoform                                                                                                                             | -2.00 |
| 1435069_at   | <i>BC064078</i>                                                                     | cDNA sequence BC064078                                                                                                                            | -2.00 |
| 1423934_at   | ---                                                                                 | ---                                                                                                                                               | -2.00 |
| 1448546_at   | <i>Rassf3</i>                                                                       | Ras association (RalGDS/AF-6) domain family 3                                                                                                     | -2.00 |
| 1460001_at   | <i>Pgpep1</i>                                                                       | pyroglutamyl-peptidase I                                                                                                                          | -1.99 |
| 1421065_at   | <i>Jak2</i>                                                                         | Janus kinase 2                                                                                                                                    | -1.99 |
| 1452493_s_at | <i>Hoxb8</i>                                                                        | homeo box B8                                                                                                                                      | -1.99 |
| 1424065_at   | <i>Edem1</i>                                                                        | ER degradation enhancer, mannosidase alpha-like 1                                                                                                 | -1.99 |
| 1422740_at   | <i>Tnfrsf21</i>                                                                     | tumor necrosis factor receptor superfamily, member 21                                                                                             | -1.99 |
| 1441056_at   | <i>Usp3</i>                                                                         | ubiquitin specific peptidase 3                                                                                                                    | -1.98 |
| 1438420_at   | <i>Rbm39</i>                                                                        | RNA binding motif protein 39                                                                                                                      | -1.98 |
| 1449874_at   | <i>Ly96</i>                                                                         | lymphocyte antigen 96                                                                                                                             | -1.98 |
| 1416094_at   | <i>Adam9</i>                                                                        | a disintegrin and metallopeptidase domain 9 (meltrin gamma)                                                                                       | -1.98 |
| 1427434_at   | ---                                                                                 | ---                                                                                                                                               | -1.98 |
| 1416629_at   | <i>Slc1a5</i>                                                                       | solute carrier family 1 (neutral amino acid transporter), member 5                                                                                | -1.98 |
| 1424927_at   | <i>Glipr1</i>                                                                       | GLI pathogenesis-related 1 (glioma)                                                                                                               | -1.98 |
| 1416407_at   | <i>Pea15</i>                                                                        | phosphoprotein enriched in astrocytes 15                                                                                                          | -1.98 |
| 1428780_at   | <i>Tha1</i>                                                                         | threonine aldolase 1                                                                                                                              | -1.98 |
| 1429086_at   | <i>Grhl2</i>                                                                        | grainyhead-like 2 ( <i>Drosophila</i> )                                                                                                           | -1.98 |
| 1449456_a_at | <i>Cma1</i>                                                                         | chymase 1, mast cell                                                                                                                              | -1.98 |
| 1434340_at   | ---                                                                                 | ---                                                                                                                                               | -1.97 |
| 1438097_at   | <i>Rab20</i>                                                                        | RAB20, member RAS oncogene family                                                                                                                 | -1.97 |
| 1438640_x_at | <i>Pgk1</i> ///<br><i>LOC433594</i> ///<br><i>LOC665053</i> ///<br><i>LOC668435</i> | phosphoglycerate kinase 1 ///<br>phosphoglycerate kinase 1-like ///<br>phosphoglycerate kinase 1 pseudogene ///<br>phosphoglycerate kinase 1-like | -1.97 |
| 1449893_a_at | <i>Lrig1</i>                                                                        | leucine-rich repeats and immunoglobulin-like domains 1                                                                                            | -1.97 |
| 1444765_at   | <i>Rbpms</i>                                                                        | RNA binding protein gene with multiple splicing                                                                                                   | -1.97 |
| 1434754_at   | <i>Garnl4</i>                                                                       | GTPase activating RANGAP domain-like 4                                                                                                            | -1.97 |
| 1452203_at   | <i>5830411E10Rik</i>                                                                | RIKEN cDNA 5830411E10 gene                                                                                                                        | -1.97 |
| 1425503_at   | <i>Gcnt2</i>                                                                        | glucosaminyl (N-acetyl) transferase 2, l-branching enzyme                                                                                         | -1.97 |

|              |                                                                  |                                                                                                                                       |       |
|--------------|------------------------------------------------------------------|---------------------------------------------------------------------------------------------------------------------------------------|-------|
| 1439775_at   | <i>Brwd3</i>                                                     | bromodomain and WD repeat domain containing 3                                                                                         | -1.97 |
| 1452862_at   | <i>Rreb1</i>                                                     | ras responsive element binding protein 1                                                                                              | -1.97 |
| 1438831_at   | <i>Crkrs</i>                                                     | Cdc2-related kinase, arginine/serine-rich                                                                                             | -1.97 |
| 1429166_s_at | <i>Clmn</i>                                                      | calmin                                                                                                                                | -1.97 |
| 1455900_x_at | <i>Tgm2</i>                                                      | transglutaminase 2, C polypeptide                                                                                                     | -1.97 |
| 1451779_at   | <i>BC027061</i>                                                  | cDNA sequence BC027061                                                                                                                | -1.96 |
| 1453072_at   | <i>Gpr160</i>                                                    | G protein-coupled receptor 160                                                                                                        | -1.96 |
| 1451438_s_at | <i>Clec2h</i>                                                    | C-type lectin domain family 2, member h                                                                                               | -1.96 |
| 1449517_at   | <i>Qpctl</i>                                                     | glutaminyl-peptide cyclotransferase-like                                                                                              | -1.96 |
| 1432464_a_at | <i>2310057J16Rik</i>                                             | RIKEN cDNA 2310057J16 gene                                                                                                            | -1.96 |
| 1439006_x_at | <i>6430550H21Rik</i>                                             | RIKEN cDNA 6430550H21 gene                                                                                                            | -1.95 |
| 1455604_at   | <i>Fzd5</i>                                                      | frizzled homolog 5 (Drosophila)                                                                                                       | -1.95 |
| 1424966_at   | <i>Tmem40</i>                                                    | transmembrane protein 40                                                                                                              | -1.95 |
| 1442986_at   | <i>Elk3</i>                                                      | ELK3, member of ETS oncogene family                                                                                                   | -1.95 |
| 1448962_at   | <i>Myh11</i>                                                     | myosin, heavy polypeptide 11, smooth muscle                                                                                           | -1.95 |
| 1418365_at   | <i>Ctsh</i>                                                      | cathepsin H                                                                                                                           | -1.95 |
| 1456725_x_at | <i>Vil2</i>                                                      | villin 2                                                                                                                              | -1.95 |
| 1430024_at   | <i>Yipf6</i>                                                     | Yip1 domain family, member 6                                                                                                          | -1.95 |
| 1424649_a_at | <i>Tspan8</i>                                                    | tetraspanin 8                                                                                                                         | -1.95 |
| 1422821_s_at | <i>Stard5</i>                                                    | StAR-related lipid transfer (START) domain containing 5                                                                               | -1.94 |
| 1432997_at   | <i>5830462P14Rik</i>                                             | RIKEN cDNA 5830462P14 gene                                                                                                            | -1.94 |
| 1418583_at   | <i>Hint3</i>                                                     | histidine triad nucleotide binding protein 3                                                                                          | -1.94 |
| 1444361_at   | ---                                                              | ---                                                                                                                                   | -1.94 |
| 1425463_at   | <i>Gata6</i>                                                     | GATA binding protein 6                                                                                                                | -1.94 |
| 1428678_s_at | <i>Wdr73</i>                                                     | WD repeat domain 73                                                                                                                   | -1.93 |
| 1433854_at   | <i>Tmem164</i>                                                   | transmembrane protein 164                                                                                                             | -1.93 |
| 1417757_at   | <i>Unc13b</i>                                                    | unc-13 homolog B (C. elegans)                                                                                                         | -1.93 |
| 1425193_at   | <i>2010106G01Rik</i>                                             | RIKEN cDNA 2010106G01 gene                                                                                                            | -1.93 |
| 1417643_at   | <i>Tsga2</i>                                                     | testis specific gene A2                                                                                                               | -1.93 |
| 1433775_at   | <i>C77080</i>                                                    | expressed sequence C77080                                                                                                             | -1.93 |
| 1438115_a_at | <i>Slc9a3r1</i>                                                  | solute carrier family 9 (sodium/hydrogen exchanger), isoform 3 regulator 1                                                            | -1.93 |
| 1416046_a_at | <i>Fuca2</i>                                                     | fucosidase, alpha-L- 2, plasma                                                                                                        | -1.93 |
| 1455581_x_at | <i>9530028C05</i>                                                | hypothetical protein 9530028C05                                                                                                       | -1.93 |
| 1433750_at   | <i>Slc31a1</i>                                                   | solute carrier family 31, member 1                                                                                                    | -1.92 |
| 1459733_at   | <i>Pea15</i>                                                     | Phosphoprotein enriched in astrocytes 15                                                                                              | -1.92 |
| 1452556_at   | ---                                                              | Envelope protein, mRNA sequence                                                                                                       | -1.92 |
| 1429114_at   | <i>Sestd1</i>                                                    | SEC14 and spectrin domains 1                                                                                                          | -1.92 |
| 1436614_at   | <i>A1843639</i>                                                  | expressed sequence A1843639                                                                                                           | -1.92 |
| 1456180_at   | <i>LOC380843 ///</i><br><i>LOC638266 ///</i><br><i>LOC666794</i> | similar to RNA binding motif protein 24 ///<br>similar to RNA binding motif protein 24 ///<br>similar to RNA binding motif protein 24 | -1.91 |
| 1451935_a_at | <i>Spint2</i>                                                    | serine protease inhibitor, Kunitz type 2                                                                                              | -1.91 |
| 1460598_at   | <i>Il28ra</i>                                                    | interleukin 28 receptor alpha                                                                                                         | -1.91 |
| 1431175_at   | <i>1810019D21Rik</i>                                             | RIKEN cDNA 1810019D21 gene                                                                                                            | -1.91 |
| 1432534_at   | <i>3300002I08Rik</i>                                             | RIKEN cDNA 3300002I08 gene                                                                                                            | -1.91 |

|              |                                                                                                                 |                                                                                                                                                                                             |       |
|--------------|-----------------------------------------------------------------------------------------------------------------|---------------------------------------------------------------------------------------------------------------------------------------------------------------------------------------------|-------|
| 1455892_x_at | LOC622147 ///<br>LOC668227 ///<br>LOC668269 ///<br>LOC669176 ///<br>LOC669658 ///<br>LOC669821 ///<br>LOC676636 | similar to melanoma antigen /// similar to melanoma antigen | -1.91 |
| 1433486_at   | <i>Clcn3</i>                                                                                                    | chloride channel 3                                                                                                                                                                          | -1.91 |
| 1426614_at   | <i>Prkcbp1</i>                                                                                                  | protein kinase C binding protein 1                                                                                                                                                          | -1.91 |
| 1434799_x_at | <i>Aldoa</i>                                                                                                    | aldolase 1, A isoform                                                                                                                                                                       | -1.91 |
| 1453677_a_at | <i>Derl3</i>                                                                                                    | Der1-like domain family, member 3                                                                                                                                                           | -1.90 |
| 1428378_at   | <i>Zc3hav1</i>                                                                                                  | zinc finger CCCH type, antiviral 1                                                                                                                                                          | -1.90 |
| 1422597_at   | <i>Mmp15</i>                                                                                                    | matrix metalloproteinase 15                                                                                                                                                                 | -1.90 |
| 1418318_at   | <i>Rnf128</i>                                                                                                   | ring finger protein 128                                                                                                                                                                     | -1.90 |
| 1458916_at   | <i>Slc12a6</i>                                                                                                  | Solute carrier family 12, member 6                                                                                                                                                          | -1.90 |
| 1453231_at   | <i>Cdkl1</i>                                                                                                    | cyclin-dependent kinase-like 1 (CDC2-related kinase)                                                                                                                                        | -1.90 |
| 1428657_at   | <i>Rreb1</i>                                                                                                    | ras responsive element binding protein 1                                                                                                                                                    | -1.90 |
| 1434418_at   | <i>Lass6</i>                                                                                                    | longevity assurance homolog 6 ( <i>S. cerevisiae</i> )                                                                                                                                      | -1.90 |
| 1455699_at   | ---                                                                                                             | Transcribed locus                                                                                                                                                                           | -1.90 |
| 1421836_at   | ---                                                                                                             | ---                                                                                                                                                                                         | -1.89 |
| 1449187_at   | <i>Pdgfa</i>                                                                                                    | platelet derived growth factor, alpha                                                                                                                                                       | -1.89 |
| 1445302_at   | <i>Igsf6</i>                                                                                                    | immunoglobulin superfamily, member 6                                                                                                                                                        | -1.89 |
| 1427196_at   | <i>Wnk4</i>                                                                                                     | WNK lysine deficient protein kinase 4                                                                                                                                                       | -1.89 |
| 1437132_x_at | <i>Nedd9</i>                                                                                                    | neural precursor cell expressed, developmentally down-regulated gene 9                                                                                                                      | -1.89 |
| 1419475_a_at | <i>Ehf</i>                                                                                                      | ets homologous factor                                                                                                                                                                       | -1.89 |
| 1420640_at   | <i>Jmy</i>                                                                                                      | junction-mediating and regulatory protein                                                                                                                                                   | -1.89 |
| 1457579_at   | <i>D11Erd717e</i>                                                                                               | DNA segment, Chr 11, ERATO Doi 717, expressed                                                                                                                                               | -1.89 |
| 1448791_at   | <i>Snx5</i>                                                                                                     | sorting nexin 5                                                                                                                                                                             | -1.88 |
| 1438116_x_at | <i>Slc9a3r1</i>                                                                                                 | solute carrier family 9 (sodium/hydrogen exchanger), isoform 3 regulator 1                                                                                                                  | -1.88 |
| 1424365_at   | <i>1810037117Rik</i>                                                                                            | RIKEN cDNA 1810037117 gene                                                                                                                                                                  | -1.88 |
| 1452349_x_at | <i>Ilf205 /// Mnda</i>                                                                                          | interferon activated gene 205 /// myeloid cell nuclear differentiation antigen                                                                                                              | -1.88 |
| 1424463_at   | <i>2210010L05Rik</i>                                                                                            | RIKEN cDNA 2210010L05 gene                                                                                                                                                                  | -1.88 |
| 1457358_at   | ---                                                                                                             | ---                                                                                                                                                                                         | -1.88 |
| 1434957_at   | <i>Cdon</i>                                                                                                     | cell adhesion molecule-related/down-regulated by oncogenes                                                                                                                                  | -1.88 |
| 1449981_a_at | <i>Nat2</i>                                                                                                     | N-acetyltransferase 2 (arylamine N-acetyltransferase)                                                                                                                                       | -1.87 |
| 1434222_at   | <i>Sipa111</i>                                                                                                  | signal-induced proliferation-associated 1 like 1                                                                                                                                            | -1.87 |
| 1458667_at   | <i>4930519N13Rik</i>                                                                                            | RIKEN cDNA 4930519N13 gene                                                                                                                                                                  | -1.87 |
| 1439734_at   | <i>Mmp15</i>                                                                                                    | Matrix metalloproteinase 15                                                                                                                                                                 | -1.87 |
| 1447213_at   | <i>Sp100</i>                                                                                                    | Nuclear antigen Sp100                                                                                                                                                                       | -1.87 |
| 1440932_at   | ---                                                                                                             | ---                                                                                                                                                                                         | -1.87 |
| 1435168_at   | <i>Zfp710</i>                                                                                                   | zinc finger protein 710                                                                                                                                                                     | -1.87 |
| 1455115_a_at | <i>Crb3</i>                                                                                                     | crumbs homolog 3 ( <i>Drosophila</i> )                                                                                                                                                      | -1.86 |
| 1449412_at   | <i>1810046J19Rik</i>                                                                                            | RIKEN cDNA 1810046J19 gene                                                                                                                                                                  | -1.86 |

|              |                                                               |                                                                                                                                                                                                                                                                                        |       |
|--------------|---------------------------------------------------------------|----------------------------------------------------------------------------------------------------------------------------------------------------------------------------------------------------------------------------------------------------------------------------------------|-------|
| 1427964_at   | <i>Cmtm8</i>                                                  | CKLF-like MARVEL transmembrane domain containing 8                                                                                                                                                                                                                                     | -1.85 |
| 1429123_at   | <i>Rab27a</i>                                                 | RAB27A, member RAS oncogene family                                                                                                                                                                                                                                                     | -1.85 |
| 1443540_at   | <i>Map3k1</i> ///<br><i>LOC670493</i> ///<br><i>LOC674573</i> | mitogen activated protein kinase kinase kinase 1 /// similar to Mitogen-activated protein kinase kinase kinase 1 (MAPK/ERK kinase kinase 1) (MEK kinase 1) (MEKK 1) /// similar to Mitogen-activated protein kinase kinase kinase 1 (MAPK/ERK kinase kinase 1) (MEK kinase 1) (MEKK 1) | -1.85 |
| 1450170_x_at | <i>H2-K1</i>                                                  | Histocompatibility 2, K1, K region                                                                                                                                                                                                                                                     | -1.85 |
| 1449084_s_at | <i>Sh3d19</i>                                                 | SH3 domain protein D19                                                                                                                                                                                                                                                                 | -1.85 |
| 1460214_at   | <i>Pcp4</i>                                                   | Purkinje cell protein 4                                                                                                                                                                                                                                                                | -1.85 |
| 1455260_at   | <i>Lcorl</i>                                                  | ligand dependent nuclear receptor corepressor-like                                                                                                                                                                                                                                     | -1.85 |
| 1439205_at   | <i>Nfatc2</i>                                                 | nuclear factor of activated T-cells, cytoplasmic, calcineurin-dependent 2                                                                                                                                                                                                              | -1.85 |
| 1459704_at   | <i>Dnajc7</i>                                                 | DnaJ (Hsp40) homolog, subfamily C, member 7                                                                                                                                                                                                                                            | -1.85 |
| 1449036_at   | <i>Rnf128</i>                                                 | ring finger protein 128                                                                                                                                                                                                                                                                | -1.85 |
| 1426082_a_at | <i>Slc16a4</i>                                                | solute carrier family 16 (monocarboxylic acid transporters), member 4                                                                                                                                                                                                                  | -1.84 |
| 1420362_a_at | <i>Bik</i>                                                    | Bcl2-interacting killer                                                                                                                                                                                                                                                                | -1.84 |
| 1433938_at   | <i>Trp53bp2</i>                                               | transformation related protein 53 binding protein 2                                                                                                                                                                                                                                    | -1.84 |
| 1419125_at   | <i>Ptpn18</i>                                                 | protein tyrosine phosphatase, non-receptor type 18                                                                                                                                                                                                                                     | -1.84 |
| 1451539_at   | <i>Baiap2l1</i>                                               | BAI1-associated protein 2-like 1                                                                                                                                                                                                                                                       | -1.84 |
| 1449397_at   | <i>Hoxb2</i>                                                  | homeo box B2                                                                                                                                                                                                                                                                           | -1.84 |
| 1445311_at   | <i>Akap13</i>                                                 | A kinase (PRKA) anchor protein 13                                                                                                                                                                                                                                                      | -1.84 |
| 1441140_at   | ---                                                           | ---                                                                                                                                                                                                                                                                                    | -1.84 |
| 1433842_at   | <i>Lrrfip1</i>                                                | leucine rich repeat (in FLII) interacting protein 1                                                                                                                                                                                                                                    | -1.84 |
| 1424456_at   | <i>Pvr2</i>                                                   | poliovirus receptor-related 2                                                                                                                                                                                                                                                          | -1.84 |
| 1433428_x_at | <i>Tgm2</i>                                                   | transglutaminase 2, C polypeptide                                                                                                                                                                                                                                                      | -1.84 |
| 1425415_a_at | <i>Slc1a1</i>                                                 | solute carrier family 1 (neuronal/epithelial high affinity glutamate transporter, system Xag), member 1                                                                                                                                                                                | -1.84 |
| 1460006_at   | <i>Atbf1</i>                                                  | AT motif binding factor 1                                                                                                                                                                                                                                                              | -1.84 |
| 1416934_at   | <i>Mtm1</i>                                                   | X-linked myotubular myopathy gene 1                                                                                                                                                                                                                                                    | -1.84 |
| 1416432_at   | <i>Pfkfb3</i>                                                 | 6-phosphofructo-2-kinase/fructose-2,6-biphosphatase 3                                                                                                                                                                                                                                  | -1.84 |
| 1434210_s_at | <i>Lrig1</i>                                                  | leucine-rich repeats and immunoglobulin-like domains 1                                                                                                                                                                                                                                 | -1.83 |
| 1435572_at   | <i>2310014L17Rik</i>                                          | RIKEN cDNA 2310014L17 gene                                                                                                                                                                                                                                                             | -1.83 |
| 1436608_at   | <i>BC038822</i>                                               | cDNA sequence BC038822                                                                                                                                                                                                                                                                 | -1.83 |
| 1444195_at   | <i>Rmnd5a</i>                                                 | Required for meiotic nuclear division 5 homolog A ( <i>S. cerevisiae</i> )                                                                                                                                                                                                             | -1.83 |
| 1453049_at   | <i>6620401M08Rik</i>                                          | RIKEN cDNA 6620401M08 gene                                                                                                                                                                                                                                                             | -1.83 |
| 1460474_at   | <i>2610028L16Rik</i>                                          | RIKEN cDNA 2610028L16 gene                                                                                                                                                                                                                                                             | -1.83 |
| 1420639_at   | <i>Jmy</i>                                                    | junction-mediating and regulatory protein                                                                                                                                                                                                                                              | -1.83 |

|              |                                                             |                                                                                                                                                              |       |
|--------------|-------------------------------------------------------------|--------------------------------------------------------------------------------------------------------------------------------------------------------------|-------|
| 1416268_at   | <i>Ets2</i>                                                 | E26 avian leukemia oncogene 2, 3' domain                                                                                                                     | -1.83 |
| 1417864_at   | <i>Pgk1</i> ///<br><i>LOC433594</i> ///<br><i>LOC668435</i> | phosphoglycerate kinase 1 ///<br>phosphoglycerate kinase 1-like ///<br>phosphoglycerate kinase 1-like                                                        | -1.82 |
| 1449248_at   | <i>Clcn2</i>                                                | chloride channel 2                                                                                                                                           | -1.82 |
| 1416737_at   | ---                                                         | ---                                                                                                                                                          | -1.82 |
| 1426241_a_at | <i>Scmh1</i>                                                | sex comb on midleg homolog 1                                                                                                                                 | -1.82 |
| 1427202_at   | <i>4833442J19Rik</i>                                        | RIKEN cDNA 4833442J19 gene                                                                                                                                   | -1.82 |
| 1422924_at   | <i>Tnfsf9</i>                                               | tumor necrosis factor (ligand) superfamily,<br>member 9                                                                                                      | -1.82 |
| 1445935_at   | ---                                                         | ---                                                                                                                                                          | -1.82 |
| 1452150_at   | <i>AU040320</i>                                             | expressed sequence AU040320                                                                                                                                  | -1.81 |
| 1418085_at   | <i>Prkcz</i>                                                | protein kinase C, zeta                                                                                                                                       | -1.81 |
| 1439060_s_at | <i>Wipi1</i>                                                | WD repeat domain, phosphoinositide<br>interacting 1                                                                                                          | -1.81 |
| 1428284_at   | <i>8430427H17Rik</i>                                        | RIKEN cDNA 8430427H17 gene                                                                                                                                   | -1.81 |
| 1436431_at   | <i>1700025G04Rik</i>                                        | RIKEN cDNA 1700025G04 gene                                                                                                                                   | -1.81 |
| 1448018_at   | ---                                                         | ---                                                                                                                                                          | -1.81 |
| 1417646_a_at | <i>Snx5</i>                                                 | sorting nexin 5                                                                                                                                              | -1.81 |
| 1450627_at   | <i>Ank</i>                                                  | progressive ankylosis                                                                                                                                        | -1.81 |
| 1416449_x_at | <i>Stxbp2</i>                                               | syntaxin binding protein 2                                                                                                                                   | -1.81 |
| 1437277_x_at | <i>Tgm2</i>                                                 | transglutaminase 2, C polypeptide                                                                                                                            | -1.81 |
| 1455285_at   | <i>Slc31a1</i>                                              | solute carrier family 31, member 1                                                                                                                           | -1.81 |
| 1434451_at   | ---                                                         | NOD-derived CD11c +ve dendritic cells<br>cDNA, RIKEN full-length enriched library,<br>clone:F630119A15 product:hypothetical<br>protein, full insert sequence | -1.80 |
| 1420683_at   | <i>Bnip1</i>                                                | BCL2/adenovirus E1B 19kD interacting<br>protein like                                                                                                         | -1.80 |
| 1460634_at   | <i>Ralgds</i>                                               | ral guanine nucleotide dissociation stimulator                                                                                                               | -1.80 |
| 1452266_at   | <i>Las1l</i>                                                | LAS1-like ( <i>S. cerevisiae</i> )                                                                                                                           | -1.80 |
| 1460584_at   | <i>Hisppd2a</i>                                             | histidine acid phosphatase domain containing<br>2A                                                                                                           | -1.80 |
| 1423519_at   | <i>2210412D01Rik</i>                                        | RIKEN cDNA 2210412D01 gene                                                                                                                                   | -1.80 |
| 1420416_at   | <i>Sema3a</i>                                               | sema domain, immunoglobulin domain (Ig),<br>short basic domain, secreted, (semaphorin)<br>3A                                                                 | -1.80 |
| 1459865_x_at | <i>Ces7</i>                                                 | carboxylesterase 7                                                                                                                                           | -1.80 |
| 1441917_s_at | <i>Tmem40</i>                                               | transmembrane protein 40                                                                                                                                     | -1.80 |
| 1435872_at   | ---                                                         | Transcribed locus                                                                                                                                            | -1.80 |
| 1442087_at   | <i>H3f3a</i>                                                | H3 histone, family 3A                                                                                                                                        | -1.80 |
| 1448659_at   | <i>Casp7</i>                                                | caspase 7                                                                                                                                                    | -1.80 |
| 1442886_at   | <i>Tra2a</i>                                                | transformer 2 alpha homolog ( <i>Drosophila</i> )                                                                                                            | -1.79 |
| 1426806_at   | <i>5830411E10Rik</i>                                        | RIKEN cDNA 5830411E10 gene                                                                                                                                   | -1.79 |
| 1425987_a_at | <i>Kcnma1</i>                                               | potassium large conductance calcium-<br>activated channel, subfamily M, alpha<br>member 1                                                                    | -1.79 |
| 1449265_at   | <i>Casp1</i>                                                | caspase 1                                                                                                                                                    | -1.79 |
| 1425321_a_at | <i>Clmn</i>                                                 | calmin                                                                                                                                                       | -1.79 |
| 1443253_at   | <i>Glis3</i>                                                | GLIS family zinc finger 3                                                                                                                                    | -1.79 |
| 1422653_at   | <i>Cep70</i>                                                | centrosomal protein 70                                                                                                                                       | -1.79 |



|              |                      |                                                                                                                          |       |
|--------------|----------------------|--------------------------------------------------------------------------------------------------------------------------|-------|
| 1416527_at   | <i>Rab32</i>         | RAB32, member RAS oncogene family                                                                                        | -1.77 |
| 1447980_s_at | <i>Rutbc2</i>        | RUN and TBC1 domain containing 2                                                                                         | -1.77 |
| 1436117_at   | <i>A830010M20Rik</i> | RIKEN cDNA A830010M20 gene                                                                                               | -1.77 |
| 1425008_a_at | <i>Iifi203</i>       | interferon activated gene 203                                                                                            | -1.77 |
| 1416109_at   | <i>Fuca1</i>         | fucosidase, alpha-L- 1, tissue                                                                                           | -1.77 |
| 1452678_a_at | <i>Ccbl1</i>         | cysteine conjugate-beta lyase 1                                                                                          | -1.76 |
| 1441200_at   | <i>Klf3</i>          | Kruppel-like factor 3 (basic)                                                                                            | -1.76 |
| 1447928_at   | <i>Car5b</i>         | carbonic anhydrase 5b, mitochondrial                                                                                     | -1.76 |
| 1417108_at   | <i>Klc4</i>          | kinesin light chain 4                                                                                                    | -1.76 |
| 1448967_at   | <i>Nipsnap3a</i>     | nipsnap homolog 3A (C. elegans)                                                                                          | -1.76 |
| 1421937_at   | <i>Dapp1</i>         | dual adaptor for phosphotyrosine and 3-phosphoinositides 1                                                               | -1.76 |
| 1440609_at   | <i>Map4k4</i>        | mitogen-activated protein kinase kinase kinase kinase 4                                                                  | -1.76 |
| 1428715_at   | <i>2810423A18Rik</i> | RIKEN cDNA 2810423A18 gene                                                                                               | -1.76 |
| 1449947_s_at | <i>Atbf1</i>         | AT motif binding factor 1                                                                                                | -1.75 |
| 1428384_at   | <i>D4Bwg0951e</i>    | DNA segment, Chr 4, Brigham & Women's Genetics 0951 expressed                                                            | -1.75 |
| 1435226_at   | <i>Ibrdc3</i>        | IBR domain containing 3                                                                                                  | -1.75 |
| 1439477_at   | <i>Ube2b</i>         | ubiquitin-conjugating enzyme E2B, RAD6 homology (S. cerevisiae)                                                          | -1.75 |
| 1457799_at   | <i>Kcns3</i>         | potassium voltage-gated channel, delayed-rectifier, subfamily S, member 3                                                | -1.75 |
| 1416921_x_at | <i>Aldoa</i>         | aldolase 1, A isoform                                                                                                    | -1.75 |
| 1456906_at   | <i>4833432P19Rik</i> | RIKEN cDNA 4833432P19 gene                                                                                               | -1.75 |
| 1460652_at   | <i>Esrra</i>         | estrogen related receptor, alpha                                                                                         | -1.75 |
| 1426894_s_at | <i>C230093N12Rik</i> | RIKEN cDNA C230093N12 gene                                                                                               | -1.75 |
| 1449951_at   | <i>Nfkbil1</i>       | nuclear factor of kappa light polypeptide gene enhancer in B-cells inhibitor-like 1                                      | -1.75 |
| 1428794_at   | <i>Specc1</i>        | spectrin domain with coiled-coils 1                                                                                      | -1.75 |
| 1441460_at   | <i>Fgfr1op2</i>      | FGFR1 oncogene partner 2                                                                                                 | -1.74 |
| 1436780_at   | <i>Ogt</i>           | O-linked N-acetylglucosamine (GlcNAc) transferase (UDP-N-acetylglucosamine:polypeptide-N-acetylglucosaminyl transferase) | -1.74 |
| 1431042_at   | <i>Paqr8</i>         | progesterin and adipoQ receptor family member VIII                                                                       | -1.74 |
| 1428613_at   | <i>Ldhd</i>          | lactate dehydrogenase D                                                                                                  | -1.74 |
| 1420617_at   | <i>Cpeb4</i>         | cytoplasmic polyadenylation element binding protein 4                                                                    | -1.74 |
| 1420649_at   | <i>Atbf1</i>         | AT motif binding factor 1                                                                                                | -1.74 |
| 1450941_at   | ---                  | ---                                                                                                                      | -1.74 |
| 1435241_at   | <i>D930036F22Rik</i> | RIKEN cDNA D930036F22 gene                                                                                               | -1.74 |
| 1434401_at   | <i>Zcchc2</i>        | zinc finger, CCHC domain containing 2                                                                                    | -1.74 |
| 1424917_a_at | <i>Wipi1</i>         | WD repeat domain, phosphoinositide interacting 1                                                                         | -1.74 |
| 1435696_s_at | <i>3110031B13Rik</i> | RIKEN cDNA 3110031B13 gene                                                                                               | -1.73 |
| 1447337_at   | <i>Dapp1</i>         | Dual adaptor for phosphotyrosine and 3-phosphoinositides 1                                                               | -1.73 |
| 1417491_at   | <i>Ctsb</i>          | cathepsin B                                                                                                              | -1.73 |
| 1434387_at   | <i>Iffg3</i>         | integrin alpha FG-GAP repeat containing 3                                                                                | -1.73 |
| 1419448_at   | <i>Tbc1d1</i>        | TBC1 domain family, member 1                                                                                             | -1.73 |

|              |                      |                                                                                                             |       |
|--------------|----------------------|-------------------------------------------------------------------------------------------------------------|-------|
| 1425004_s_at | <i>Mocs1</i>         | molybdenum cofactor synthesis 1                                                                             | -1.73 |
| 1449402_at   | <i>Chst7</i>         | carbohydrate (N-acetylglucosamino) sulfotransferase 7                                                       | -1.73 |
| 1444922_at   | ---                  | PREDICTED: Mus musculus similar to microtubule-associated protein, RP/EB family, member 3 (LOC620153), mRNA | -1.73 |
| 1452152_at   | <i>Clint1</i>        | clathrin interactor 1                                                                                       | -1.73 |
| 1457915_at   | <i>4833442J19Rik</i> | RIKEN cDNA 4833442J19 gene                                                                                  | -1.73 |
| 1445561_at   | <i>Grip1</i>         | Glutamate receptor interacting protein 1                                                                    | -1.73 |
| 1416085_s_at | <i>Zfand5</i>        | zinc finger, AN1-type domain 5                                                                              | -1.73 |
| 1430185_at   | <i>5830460E08Rik</i> | RIKEN cDNA 5830460E08 gene                                                                                  | -1.73 |
| 1446094_at   | <i>Atbf1</i>         | AT motif binding factor 1                                                                                   | -1.73 |
| 1448434_at   | <i>Rnf103</i>        | ring finger protein 103                                                                                     | -1.73 |
| 1420993_at   | <i>B3gnt5</i>        | UDP-GlcNAc:betaGal beta-1,3-N-acetylglucosaminyltransferase 5                                               | -1.73 |
| 1442679_at   | <i>Map2k4</i>        | Mitogen activated protein kinase kinase 4                                                                   | -1.73 |
| 1433937_at   | <i>Trp53bp2</i>      | transformation related protein 53 binding protein 2                                                         | -1.73 |
| 1437341_x_at | <i>Cnp1</i>          | cyclic nucleotide phosphodiesterase 1                                                                       | -1.72 |
| 1416610_a_at | <i>Clcn3</i>         | chloride channel 3                                                                                          | -1.72 |
| 1431405_a_at | <i>4930413O22Rik</i> | RIKEN cDNA 4930413O22 gene                                                                                  | -1.72 |
| 1427931_s_at | <i>Pdxk</i>          | pyridoxal (pyridoxine, vitamin B6) kinase                                                                   | -1.72 |
| 1420984_at   | <i>Pctp</i>          | phosphatidylcholine transfer protein                                                                        | -1.72 |
| 1421943_at   | <i>Tgfa</i>          | transforming growth factor alpha                                                                            | -1.72 |
| 1427299_at   | <i>Rps6ka3</i>       | ribosomal protein S6 kinase polypeptide 3                                                                   | -1.72 |
| 1434059_at   | <i>B230312A22Rik</i> | RIKEN cDNA B230312A22 gene                                                                                  | -1.72 |
| 1423276_at   | <i>Ildr1</i>         | immunoglobulin-like domain containing receptor 1                                                            | -1.72 |
| 1419550_a_at | <i>Stk39</i>         | serine/threonine kinase 39, STE20/SPS1 homolog (yeast)                                                      | -1.72 |
| 1423785_at   | <i>Egln1</i>         | EGL nine homolog 1 ( <i>C. elegans</i> )                                                                    | -1.72 |
| 1420018_s_at | <i>Tspan8</i>        | tetraspanin 8                                                                                               | -1.72 |
| 1450999_a_at | <i>1700029H14Rik</i> | RIKEN cDNA 1700029H14 gene                                                                                  | -1.71 |
| 1448634_at   | <i>Ralbp1</i>        | ralA binding protein 1                                                                                      | -1.71 |
| 1450490_at   | <i>Kcna7</i>         | potassium voltage-gated channel, shaker-related subfamily, member 7                                         | -1.71 |
| 1433649_at   | <i>Aof1</i>          | amine oxidase, flavin containing 1                                                                          | -1.71 |
| 1437767_s_at | <i>Fts</i>           | fused toes                                                                                                  | -1.71 |
| 1429474_at   | <i>Zadh1</i>         | zinc binding alcohol dehydrogenase, domain containing 1                                                     | -1.71 |
| 1438041_at   | ---                  | ---                                                                                                         | -1.71 |
| 1457216_at   | <i>Rc3h1</i>         | RING CCCH (C3H) domains 1                                                                                   | -1.71 |
| 1434954_at   | ---                  | ---                                                                                                         | -1.70 |
| 1452734_at   | <i>Rnaset2</i>       | ribonuclease T2                                                                                             | -1.70 |
| 1454676_s_at | <i>Ticam1</i>        | toll-like receptor adaptor molecule 1                                                                       | -1.70 |
| 1449836_x_at | <i>Bik</i>           | Bcl2-interacting killer                                                                                     | -1.70 |
| 1444973_at   | <i>Kcnma1</i>        | Potassium large conductance calcium-activated channel, subfamily M, alpha member 1                          | -1.70 |
| 1442849_at   | <i>Lrp1</i>          | low density lipoprotein receptor-related protein 1                                                          | -1.70 |



|              |                                                                                                                                                                                                               |                                                                                                                                                                                                                                                                                                                                                                                                                      |       |
|--------------|---------------------------------------------------------------------------------------------------------------------------------------------------------------------------------------------------------------|----------------------------------------------------------------------------------------------------------------------------------------------------------------------------------------------------------------------------------------------------------------------------------------------------------------------------------------------------------------------------------------------------------------------|-------|
| 1416935_at   | <i>Trpv2</i>                                                                                                                                                                                                  | transient receptor potential cation channel, subfamily V, member 2                                                                                                                                                                                                                                                                                                                                                   | -1.70 |
| 1419526_at   | <i>Fgr</i>                                                                                                                                                                                                    | Gardner-Rasheed feline sarcoma viral (Fgr) oncogene homolog                                                                                                                                                                                                                                                                                                                                                          | -1.70 |
| 1428650_at   | <i>Tns1</i>                                                                                                                                                                                                   | tensin 1                                                                                                                                                                                                                                                                                                                                                                                                             | -1.70 |
| 1433487_at   | <i>Clcn3</i>                                                                                                                                                                                                  | chloride channel 3                                                                                                                                                                                                                                                                                                                                                                                                   | -1.70 |
| 1448494_at   | <i>Gas1</i>                                                                                                                                                                                                   | growth arrest specific 1                                                                                                                                                                                                                                                                                                                                                                                             | -1.69 |
| 1427362_x_at | <i>Hoxc6</i>                                                                                                                                                                                                  | homeo box C6                                                                                                                                                                                                                                                                                                                                                                                                         | -1.69 |
| 1439435_x_at | <i>Pgk1</i> ///<br><i>LOC433594</i> ///<br><i>LOC665053</i> ///<br><i>LOC668435</i>                                                                                                                           | phosphoglycerate kinase 1 ///<br>phosphoglycerate kinase 1-like ///<br>phosphoglycerate kinase 1 pseudogene ///<br>phosphoglycerate kinase 1-like                                                                                                                                                                                                                                                                    | -1.69 |
| 1448958_at   | <i>Ifrg15</i>                                                                                                                                                                                                 | interferon alpha responsive gene                                                                                                                                                                                                                                                                                                                                                                                     | -1.69 |
| 1456145_at   | <i>Dleu2</i>                                                                                                                                                                                                  | deleted in lymphocytic leukemia, 2                                                                                                                                                                                                                                                                                                                                                                                   | -1.69 |
| 1450634_at   | <i>Atp6v1a</i>                                                                                                                                                                                                | ATPase, H <sup>+</sup> transporting, lysosomal V1 subunit A                                                                                                                                                                                                                                                                                                                                                          | -1.69 |
| 1438195_at   | <i>Gpd1l</i> ///<br><i>LOC672508</i>                                                                                                                                                                          | glycerol-3-phosphate dehydrogenase 1-like ///<br>similar to glycerol-3-phosphate dehydrogenase 1-like                                                                                                                                                                                                                                                                                                                | -1.69 |
| 1436242_a_at | <i>Cklf</i>                                                                                                                                                                                                   | chemokine-like factor                                                                                                                                                                                                                                                                                                                                                                                                | -1.69 |
| 1455618_x_at | <i>Tspan33</i>                                                                                                                                                                                                | tetraspanin 33                                                                                                                                                                                                                                                                                                                                                                                                       | -1.69 |
| 1451628_a_at | <i>Ank3</i>                                                                                                                                                                                                   | ankyrin 3, epithelial                                                                                                                                                                                                                                                                                                                                                                                                | -1.68 |
| 1449322_at   | <i>Ptp4a1</i> ///<br><i>LOC269859</i> ///<br><i>LOC433406</i> ///<br><i>LOC546482</i> ///<br><i>LOC627166</i> ///<br><i>LOC627200</i> ///<br><i>LOC667723</i> ///<br><i>LOC669215</i> ///<br><i>LOC673579</i> | protein tyrosine phosphatase 4a1 /// similar to protein tyrosine phosphatase 4a1 /// protein tyrosine phosphatase 4a1-like /// similar to protein tyrosine phosphatase 4a1 /// protein tyrosine phosphatase 4a1 pseudogene /// protein tyrosine phosphatase 4a1-like /// similar to protein tyrosine phosphatase 4a1 /// similar to protein tyrosine phosphatase 4a1 /// similar to protein tyrosine phosphatase 4a1 | -1.68 |
| 1439689_at   | <i>9030224M15Rik</i>                                                                                                                                                                                          | RIKEN cDNA 9030224M15 gene                                                                                                                                                                                                                                                                                                                                                                                           | -1.68 |
| 1429337_at   | <i>2610301K12Rik</i>                                                                                                                                                                                          | RIKEN cDNA 2610301K12 gene                                                                                                                                                                                                                                                                                                                                                                                           | -1.68 |
| 1449099_at   | <i>Lrba</i>                                                                                                                                                                                                   | LPS-responsive beige-like anchor                                                                                                                                                                                                                                                                                                                                                                                     | -1.68 |
| 1422593_at   | <i>Ap3s1</i>                                                                                                                                                                                                  | adaptor-related protein complex 3, sigma 1 subunit                                                                                                                                                                                                                                                                                                                                                                   | -1.68 |
| 1433836_a_at | <i>8430408G22Rik</i>                                                                                                                                                                                          | RIKEN cDNA 8430408G22 gene                                                                                                                                                                                                                                                                                                                                                                                           | -1.68 |
| 1431862_x_at | <i>Odf2l</i>                                                                                                                                                                                                  | outer dense fiber of sperm tails 2-like                                                                                                                                                                                                                                                                                                                                                                              | -1.68 |
| 1448558_a_at | <i>Pla2g4a</i>                                                                                                                                                                                                | phospholipase A2, group IVA (cytosolic, calcium-dependent)                                                                                                                                                                                                                                                                                                                                                           | -1.68 |
| 1420824_at   | <i>Sema4d</i>                                                                                                                                                                                                 | sema domain, immunoglobulin domain (Ig), transmembrane domain (TM) and short cytoplasmic domain, (semaphorin) 4D                                                                                                                                                                                                                                                                                                     | -1.68 |
| 1448547_at   | <i>Rassf3</i>                                                                                                                                                                                                 | Ras association (RalGDS/AF-6) domain family 3                                                                                                                                                                                                                                                                                                                                                                        | -1.68 |
| 1418924_at   | <i>Rassf7</i>                                                                                                                                                                                                 | Ras association (RalGDS/AF-6) domain family 7                                                                                                                                                                                                                                                                                                                                                                        | -1.67 |
| 1419587_s_at | <i>Rp2h</i>                                                                                                                                                                                                   | retinitis pigmentosa 2 homolog (human)                                                                                                                                                                                                                                                                                                                                                                               | -1.67 |
| 1427404_x_at | <i>LOC433182</i>                                                                                                                                                                                              | similar to enolase 1, alpha non-neuron                                                                                                                                                                                                                                                                                                                                                                               | -1.67 |
| 1442749_at   | <i>Braf</i>                                                                                                                                                                                                   | Braf transforming gene                                                                                                                                                                                                                                                                                                                                                                                               | -1.67 |
| 1436210_at   | <i>C330018K18Rik</i>                                                                                                                                                                                          | RIKEN cDNA C330018K18 gene                                                                                                                                                                                                                                                                                                                                                                                           | -1.67 |

|              |                      |                                                                                   |       |
|--------------|----------------------|-----------------------------------------------------------------------------------|-------|
| 1449167_at   | <i>Epb4.1l4a</i>     | erythrocyte protein band 4.1-like 4a                                              | -1.67 |
| 1424700_at   | <i>Tmem38b</i>       | transmembrane protein 38B                                                         | -1.67 |
| 1432825_at   | <i>2900018N21Rik</i> | RIKEN cDNA 2900018N21 gene                                                        | -1.67 |
| 1448752_at   | <i>Car2</i>          | carbonic anhydrase 2                                                              | -1.67 |
| 1418943_at   | <i>B230120H23Rik</i> | RIKEN cDNA B230120H23 gene                                                        | -1.67 |
| 1455551_at   | <i>Uevld</i>         | UEV and lactate/malate dehydrogenase domains                                      | -1.67 |
| 1450982_at   | <i>Slc9a3r1</i>      | solute carrier family 9 (sodium/hydrogen exchanger), isoform 3 regulator 1        | -1.67 |
| 1426810_at   | <i>Jmjd1a</i>        | jumonji domain containing 1A                                                      | -1.67 |
| 1448000_at   | <i>Cdca3</i>         | cell division cycle associated 3                                                  | -1.67 |
| 1460453_at   | <i>Tagap</i>         | T-cell activation Rho GTPase-activating protein                                   | -1.67 |
| 1446906_at   | <i>C81615</i>        | expressed sequence C81615                                                         | -1.67 |
| 1426926_at   | <i>Plcg2</i>         | phospholipase C, gamma 2                                                          | -1.67 |
| 1436158_at   | <i>Eif4ebp2</i>      | eukaryotic translation initiation factor 4E binding protein 2                     | -1.67 |
| 1450745_at   | <i>C1galt1</i>       | core 1 UDP-galactose:N-acetylgalactosamine-alpha-R beta 1,3-galactosyltransferase | -1.66 |
| 1437198_at   | <i>Lig3</i>          | ligase III, DNA, ATP-dependent                                                    | -1.66 |
| 1460671_at   | <i>Gpx1</i>          | glutathione peroxidase 1                                                          | -1.66 |
| 1417346_at   | <i>Pycard</i>        | PYD and CARD domain containing                                                    | -1.66 |
| 1450084_s_at | <i>Ivns1abp</i>      | influenza virus NS1A binding protein                                              | -1.66 |
| 1428996_at   | <i>4833426J09Rik</i> | RIKEN cDNA 4833426J09 gene                                                        | -1.66 |
| 1437431_at   | ---                  | ---                                                                               | -1.66 |
| 1433670_at   | <i>Emp2</i>          | epithelial membrane protein 2                                                     | -1.66 |
| 1455051_at   | <i>Rnf31</i>         | ring finger protein 31                                                            | -1.66 |
| 1421023_at   | <i>Pik3c2a</i>       | phosphatidylinositol 3-kinase, C2 domain containing, alpha polypeptide            | -1.66 |
| 1420242_at   | ---                  | ---                                                                               | -1.66 |
| 1434653_at   | <i>Ptk2b</i>         | PTK2 protein tyrosine kinase 2 beta                                               | -1.66 |
| 1435595_at   | <i>1810011O10Rik</i> | RIKEN cDNA 1810011O10 gene                                                        | -1.65 |
| 1434741_at   | <i>Rreb1</i>         | ras responsive element binding protein 1                                          | -1.65 |
| 1446957_s_at | <i>BC004022</i>      | cDNA sequence BC004022                                                            | -1.65 |
| 1451523_a_at | <i>Mif4gd</i>        | MIF4G domain containing                                                           | -1.65 |
| 1426964_at   | <i>3110003A17Rik</i> | RIKEN cDNA 3110003A17 gene                                                        | -1.65 |
| 1453283_at   | <i>Pgm1</i>          | phosphoglucomutase 1                                                              | -1.65 |
| 1436236_x_at | <i>Cotl1</i>         | coactosin-like 1 (Dictyostelium)                                                  | -1.65 |
| 1434306_at   | <i>Rab3ip</i>        | RAB3A interacting protein                                                         | -1.65 |
| 1423277_at   | <i>Ptprk</i>         | protein tyrosine phosphatase, receptor type, K                                    | -1.65 |
| 1439406_x_at | <i>Fars2</i>         | phenylalanine-tRNA synthetase 2 (mitochondrial)                                   | -1.65 |
| 1458616_at   | <i>B4galt1</i>       | UDP-Gal:betaGlcNAc beta 1,4-galactosyltransferase, polypeptide 1                  | -1.65 |
| 1434102_at   | <i>Nfib</i>          | nuclear factor I/B                                                                | -1.65 |
| 1431510_s_at | <i>2010110K16Rik</i> | RIKEN cDNA 2010110K16 gene                                                        | -1.65 |
| 1451338_at   | <i>Nisch</i>         | nischarin                                                                         | -1.65 |
| 1430103_at   | <i>9030607L20Rik</i> | RIKEN cDNA 9030607L20 gene                                                        | -1.65 |
| 1436871_at   | <i>Sfrs7</i>         | splicing factor, arginine/serine-rich 7                                           | -1.65 |

|              |                                                                                                                      |                                                                                                                                                                                               |       |
|--------------|----------------------------------------------------------------------------------------------------------------------|-----------------------------------------------------------------------------------------------------------------------------------------------------------------------------------------------|-------|
| 1447734_x_at | <i>Aldoa</i> ///<br><i>LOC667483</i> ///<br><i>LOC671023</i>                                                         | aldolase 1, A isoform /// similar to Fructose-bisphosphate aldolase A (Muscle-type aldolase) (Aldolase 1) /// similar to Fructose-bisphosphate aldolase A (Muscle-type aldolase) (Aldolase 1) | -1.64 |
| 1425028_a_at | <i>Tpm2</i>                                                                                                          | tropomyosin 2, beta                                                                                                                                                                           | -1.64 |
| 1436838_x_at | <i>Cot11</i>                                                                                                         | coactosin-like 1 (Dictyostelium)                                                                                                                                                              | -1.64 |
| 1436056_at   | <i>Kif13b</i>                                                                                                        | kinesin family member 13B                                                                                                                                                                     | -1.64 |
| 1443558_s_at | <i>C630002B14Rik</i>                                                                                                 | RIKEN cDNA C630002B14 gene                                                                                                                                                                    | -1.64 |
| 1420809_a_at | <i>1500003O03Rik</i>                                                                                                 | RIKEN cDNA 1500003O03 gene                                                                                                                                                                    | -1.64 |
| 1436747_at   | <i>1110014K08Rik</i> ///<br><i>LOC664786</i> ///<br><i>LOC664849</i> ///<br><i>LOC669054</i> ///<br><i>LOC672175</i> | RIKEN cDNA 1110014K08 gene ///<br>hypothetical protein LOC664786 ///<br>hypothetical protein LOC664849 ///<br>hypothetical protein LOC669054 ///<br>hypothetical protein LOC672175            | -1.64 |
| 1448287_at   | <i>Rpo1-3</i>                                                                                                        | RNA polymerase 1-3                                                                                                                                                                            | -1.64 |
| 1422340_a_at | <i>Actg2</i>                                                                                                         | actin, gamma 2, smooth muscle, enteric                                                                                                                                                        | -1.64 |
| 1428775_at   | <i>1110008L16Rik</i>                                                                                                 | RIKEN cDNA 1110008L16 gene                                                                                                                                                                    | -1.64 |
| 1437733_at   | <i>Eif4ebp2</i>                                                                                                      | eukaryotic translation initiation factor 4E binding protein 2                                                                                                                                 | -1.64 |
| 1442175_at   | <i>C030027H14Rik</i>                                                                                                 | RIKEN cDNA C030027H14 gene                                                                                                                                                                    | -1.64 |
| 1429758_at   | <i>1700017B05Rik</i> ///<br><i>LOC640563</i>                                                                         | RIKEN cDNA 1700017B05 gene ///<br>hypothetical protein LOC640563                                                                                                                              | -1.64 |
| 1418482_at   | <i>Cyb561d2</i>                                                                                                      | cytochrome b-561 domain containing 2                                                                                                                                                          | -1.64 |
| 1424027_at   | <i>Pxn</i>                                                                                                           | paxillin                                                                                                                                                                                      | -1.64 |
| 1418711_at   | <i>Pdgfa</i>                                                                                                         | platelet derived growth factor, alpha                                                                                                                                                         | -1.64 |
| 1451750_at   | ---                                                                                                                  | ---                                                                                                                                                                                           | -1.64 |
| 1433808_at   | <i>D330001F17Rik</i>                                                                                                 | RIKEN cDNA D330001F17 gene                                                                                                                                                                    | -1.64 |
| 1426440_at   | <i>Dhrs7</i>                                                                                                         | dehydrogenase/reductase (SDR family) member 7                                                                                                                                                 | -1.64 |
| 1425460_at   | <i>Mtmr2</i>                                                                                                         | myotubularin related protein 2                                                                                                                                                                | -1.64 |
| 1457676_at   | <i>Tirap</i>                                                                                                         | toll-interleukin 1 receptor (TIR) domain-containing adaptor protein                                                                                                                           | -1.63 |
| 1435908_at   | <i>Nrxn2</i>                                                                                                         | neurexin II                                                                                                                                                                                   | -1.63 |
| 1436244_a_at | <i>Tle2</i>                                                                                                          | transducin-like enhancer of split 2, homolog of <i>Drosophila</i> E(spl)                                                                                                                      | -1.63 |
| 1428279_a_at | <i>Atxn7l4</i>                                                                                                       | ataxin 7-like 4                                                                                                                                                                               | -1.63 |
| 1439470_at   | <i>2410025L10Rik</i>                                                                                                 | RIKEN cDNA 2410025L10 gene                                                                                                                                                                    | -1.63 |
| 1426307_at   | <i>Cyb5r4</i>                                                                                                        | cytochrome b5 reductase 4                                                                                                                                                                     | -1.63 |
| 1455111_at   | <i>Yipf6</i>                                                                                                         | Yip1 domain family, member 6                                                                                                                                                                  | -1.63 |
| 1436502_at   | <i>Mtus1</i>                                                                                                         | mitochondrial tumor suppressor 1                                                                                                                                                              | -1.63 |
| 1450860_at   | <i>Lap3</i>                                                                                                          | leucine aminopeptidase 3                                                                                                                                                                      | -1.63 |
| 1420842_at   | <i>Ptprf</i>                                                                                                         | protein tyrosine phosphatase, receptor type, F                                                                                                                                                | -1.63 |
| 1448215_a_at | <i>Dpp3</i>                                                                                                          | dipeptidylpeptidase 3                                                                                                                                                                         | -1.63 |
| 1448153_at   | <i>Cox5a</i>                                                                                                         | cytochrome c oxidase, subunit Va                                                                                                                                                              | -1.63 |
| 1418416_x_at | <i>Psg23</i>                                                                                                         | pregnancy-specific glycoprotein 23                                                                                                                                                            | -1.63 |
| 1417122_at   | <i>Vav3</i>                                                                                                          | vav 3 oncogene                                                                                                                                                                                | -1.63 |
| 1425129_a_at | <i>Taldo1</i>                                                                                                        | transaldolase 1                                                                                                                                                                               | -1.62 |
| 1425459_at   | <i>Mtmr2</i>                                                                                                         | myotubularin related protein 2                                                                                                                                                                | -1.62 |
| 1425718_a_at | <i>Ivns1abp</i>                                                                                                      | influenza virus NS1A binding protein                                                                                                                                                          | -1.62 |

|              |                                                                                                               |                                                                                                                                                                                                                      |       |
|--------------|---------------------------------------------------------------------------------------------------------------|----------------------------------------------------------------------------------------------------------------------------------------------------------------------------------------------------------------------|-------|
| 1426626_at   | <i>Gtf2f2</i>                                                                                                 | general transcription factor IIF, polypeptide 2                                                                                                                                                                      | -1.62 |
| 1417674_s_at | <i>Golga4</i>                                                                                                 | golgi autoantigen, golgin subfamily a, 4                                                                                                                                                                             | -1.62 |
| 1450660_at   | <i>Pts</i>                                                                                                    | 6-pyruvoyl-tetrahydropterin synthase                                                                                                                                                                                 | -1.62 |
| 1449677_s_at | <i>Tmem38b</i>                                                                                                | transmembrane protein 38B                                                                                                                                                                                            | -1.62 |
| 1454182_at   | <i>5430417C01Rik</i>                                                                                          | RIKEN cDNA 5430417C01 gene                                                                                                                                                                                           | -1.62 |
| 1427485_at   | <i>Lmod1</i>                                                                                                  | leiomodoin 1 (smooth muscle)                                                                                                                                                                                         | -1.62 |
| 1460104_at   | <i>Vps4b</i>                                                                                                  | vacuolar protein sorting 4b (yeast)                                                                                                                                                                                  | -1.62 |
| 1416387_at   | <i>Pip5k2c</i>                                                                                                | phosphatidylinositol-4-phosphate 5-kinase, type II, gamma                                                                                                                                                            | -1.62 |
| 1421858_at   | <i>Adam17</i>                                                                                                 | a disintegrin and metallopeptidase domain 17                                                                                                                                                                         | -1.61 |
| 1424092_at   | <i>Epb4.1</i>                                                                                                 | erythrocyte protein band 4.1                                                                                                                                                                                         | -1.61 |
| 1418384_at   | <i>9430083G14Rik</i>                                                                                          | RIKEN cDNA 9430083G14 gene                                                                                                                                                                                           | -1.61 |
| 1417579_x_at | <i>Gmppa</i>                                                                                                  | GDP-mannose pyrophosphorylase A                                                                                                                                                                                      | -1.61 |
| 1426151_a_at | <i>Stx3</i>                                                                                                   | syntaxin 3                                                                                                                                                                                                           | -1.61 |
| 1424809_at   | <i>Crb3</i>                                                                                                   | crumbs homolog 3 (Drosophila)                                                                                                                                                                                        | -1.61 |
| 1420907_at   | <i>Cd2ap</i>                                                                                                  | CD2-associated protein                                                                                                                                                                                               | -1.61 |
| 1424552_at   | <i>Casp8</i>                                                                                                  | caspase 8                                                                                                                                                                                                            | -1.61 |
| 1417671_at   | <i>Scly</i>                                                                                                   | selenocysteine lyase                                                                                                                                                                                                 | -1.61 |
| 1455018_at   | <i>Lmtk2</i>                                                                                                  | lemur tyrosine kinase 2                                                                                                                                                                                              | -1.61 |
| 1433740_at   | <i>2610301K12Rik</i>                                                                                          | RIKEN cDNA 2610301K12 gene                                                                                                                                                                                           | -1.61 |
| 1441290_at   | <i>4930506M07Rik</i>                                                                                          | RIKEN cDNA 4930506M07 gene                                                                                                                                                                                           | -1.60 |
| 1448664_a_at | <i>Speg</i>                                                                                                   | SPEG complex locus                                                                                                                                                                                                   | -1.60 |
| 1424253_at   | <i>1810073G14Rik</i>                                                                                          | RIKEN cDNA 1810073G14 gene                                                                                                                                                                                           | -1.60 |
| 1419022_a_at | <i>Eno1</i> ///<br><i>LOC433182</i> ///<br><i>LOC672232</i>                                                   | enolase 1, alpha non-neuron /// similar to enolase 1, alpha non-neuron /// similar to Alpha-enolase (2-phospho-D-glycerate hydrolyase) (Non-neural enolase) (NNE) (Enolase 1)                                        | -1.60 |
| 1418115_s_at | <i>Ifrg15</i>                                                                                                 | interferon alpha responsive gene                                                                                                                                                                                     | -1.60 |
| 1438657_x_at | <i>Ptp4a1</i> ///<br><i>LOC433406</i> ///<br><i>LOC627166</i> ///<br><i>LOC627200</i> ///<br><i>LOC667723</i> | protein tyrosine phosphatase 4a1 /// protein tyrosine phosphatase 4a1-like /// protein tyrosine phosphatase 4a1 pseudogene /// protein tyrosine phosphatase 4a1-like /// similar to protein tyrosine phosphatase 4a1 | -1.60 |
| 1425212_a_at | <i>Tnfrsf19</i>                                                                                               | tumor necrosis factor receptor superfamily, member 19                                                                                                                                                                | -1.60 |
| 1427680_a_at | <i>Nfib</i>                                                                                                   | nuclear factor I/B                                                                                                                                                                                                   | -1.60 |
| 1425135_a_at | <i>Dnm2</i>                                                                                                   | dynamamin 2                                                                                                                                                                                                          | -1.60 |
| 1442402_at   | <i>Sh3rf1</i>                                                                                                 | SH3 domain containing ring finger 1                                                                                                                                                                                  | -1.60 |
| 1460428_at   | <i>Ankrd13a</i>                                                                                               | ankyrin repeat domain 13a                                                                                                                                                                                            | -1.60 |
| 1459324_at   | ---                                                                                                           | ---                                                                                                                                                                                                                  | -1.60 |
| 1431287_at   | <i>Pcm1</i>                                                                                                   | pericentriolar material 1                                                                                                                                                                                            | -1.60 |
| 1417125_at   | <i>Ahcy</i>                                                                                                   | S-adenosylhomocysteine hydrolase                                                                                                                                                                                     | -1.60 |
| 1424386_at   | <i>Reep2</i>                                                                                                  | receptor accessory protein 2                                                                                                                                                                                         | -1.60 |
| 1425635_at   | <i>Tnk1</i>                                                                                                   | tyrosine kinase, non-receptor, 1                                                                                                                                                                                     | -1.60 |
| 1444501_at   | <i>A1462521</i>                                                                                               | expressed sequence A1462521                                                                                                                                                                                          | -1.60 |
| 1460594_a_at | <i>Gmppa</i>                                                                                                  | GDP-mannose pyrophosphorylase A                                                                                                                                                                                      | -1.59 |
| 1437738_at   | <i>Atp2c1</i>                                                                                                 | ATPase, Ca <sup>++</sup> -sequestering                                                                                                                                                                               | -1.59 |
| 1443194_at   | ---                                                                                                           | ---                                                                                                                                                                                                                  | -1.59 |

|              |                                                              |                                                                                                                                                                                               |       |
|--------------|--------------------------------------------------------------|-----------------------------------------------------------------------------------------------------------------------------------------------------------------------------------------------|-------|
| 1428093_at   | <i>Trabd</i>                                                 | TraB domain containing                                                                                                                                                                        | -1.59 |
| 1450992_a_at | <i>Meis1</i>                                                 | myeloid ecotropic viral integration site 1                                                                                                                                                    | -1.59 |
| 1415793_at   | <i>Pnpo</i>                                                  | pyridoxine 5'-phosphate oxidase                                                                                                                                                               | -1.59 |
| 1447100_s_at | <i>5730508B09Rik</i>                                         | RIKEN cDNA 5730508B09 gene                                                                                                                                                                    | -1.59 |
| 1423314_s_at | <i>Pde7a</i>                                                 | phosphodiesterase 7A                                                                                                                                                                          | -1.59 |
| 1429764_at   | <i>1500005K14Rik</i>                                         | RIKEN cDNA 1500005K14 gene                                                                                                                                                                    | -1.59 |
| 1443917_at   | <i>Tmbim4</i>                                                | transmembrane BAX inhibitor motif containing 4                                                                                                                                                | -1.59 |
| 1424782_at   | <i>Tmem77</i>                                                | transmembrane protein 77                                                                                                                                                                      | -1.59 |
| 1425974_a_at | <i>Trim25</i>                                                | tripartite motif protein 25                                                                                                                                                                   | -1.59 |
| 1424119_at   | <i>Prkab1</i>                                                | protein kinase, AMP-activated, beta 1 non-catalytic subunit                                                                                                                                   | -1.59 |
| 1435402_at   | <i>Gramd1b</i>                                               | GRAM domain containing 1B                                                                                                                                                                     | -1.59 |
| 1417904_at   | <i>Dclre1a</i>                                               | DNA cross-link repair 1A, PSO2 homolog (S. cerevisiae)                                                                                                                                        | -1.59 |
| 1457455_at   | <i>Suhw4</i>                                                 | suppressor of hairy wing homolog 4 (Drosophila)                                                                                                                                               | -1.59 |
| 1429407_at   | <i>Pex11c</i>                                                | peroxisomal biogenesis factor 11c                                                                                                                                                             | -1.59 |
| 1433672_at   | <i>4732479N06Rik</i>                                         | RIKEN cDNA 4732479N06 gene                                                                                                                                                                    | -1.58 |
| 1451393_at   | <i>Pex26</i>                                                 | peroxisome biogenesis factor 26                                                                                                                                                               | -1.58 |
| 1458218_s_at | <i>Pde7a</i>                                                 | phosphodiesterase 7A                                                                                                                                                                          | -1.58 |
| 1439375_x_at | <i>Aldoa</i> ///<br><i>LOC667483</i> ///<br><i>LOC671023</i> | aldolase 1, A isoform /// similar to Fructose-bisphosphate aldolase A (Muscle-type aldolase) (Aldolase 1) /// similar to Fructose-bisphosphate aldolase A (Muscle-type aldolase) (Aldolase 1) | -1.58 |
| 1439662_at   | <i>Homer1</i>                                                | homer homolog 1 (Drosophila)                                                                                                                                                                  | -1.58 |
| 1448721_at   | <i>D1Ert622e</i>                                             | DNA segment, Chr 1, ERATO Doi 622, expressed                                                                                                                                                  | -1.58 |
| 1416104_at   | <i>Mpdu1</i>                                                 | mannose-P-dolichol utilization defect 1                                                                                                                                                       | -1.58 |
| 1453731_a_at | <i>Tmem77</i>                                                | transmembrane protein 77                                                                                                                                                                      | -1.58 |
| 1435531_at   | <i>Usp3</i>                                                  | ubiquitin specific peptidase 3                                                                                                                                                                | -1.58 |
| 1418143_at   | <i>Vps45</i>                                                 | vacuolar protein sorting 45 (yeast)                                                                                                                                                           | -1.58 |
| 1452935_at   | <i>LOC546143</i>                                             | hypothetical protein LOC546143                                                                                                                                                                | -1.58 |
| 1446974_at   | <i>Pip5k3</i>                                                | phosphatidylinositol-3-phosphate/phosphatidylinositol 5-kinase, type III                                                                                                                      | -1.58 |
| 1446670_at   | <i>Cugbp2</i>                                                | CUG triplet repeat, RNA binding protein 2                                                                                                                                                     | -1.58 |
| 1460213_at   | <i>Golga4</i>                                                | golgi autoantigen, golgin subfamily a, 4                                                                                                                                                      | -1.58 |
| 1415814_at   | <i>Atp6v1b2</i>                                              | ATPase, H <sup>+</sup> transporting, lysosomal V1 subunit B2                                                                                                                                  | -1.58 |
| 1435905_at   | <i>D3Ert300e</i>                                             | DNA segment, Chr 3, ERATO Doi 300, expressed                                                                                                                                                  | -1.57 |
| 1451435_at   | <i>Cutl1</i>                                                 | cut-like 1 (Drosophila)                                                                                                                                                                       | -1.57 |
| 1442080_at   | <i>Creb3l2</i>                                               | CAMP responsive element binding protein 3-like 2                                                                                                                                              | -1.57 |
| 1420624_a_at | <i>Vamp8</i>                                                 | vesicle-associated membrane protein 8                                                                                                                                                         | -1.57 |
| 1431246_at   | <i>Iqce</i>                                                  | IQ motif containing E                                                                                                                                                                         | -1.57 |
| 1431997_at   | <i>3000002C10Rik</i>                                         | RIKEN cDNA 3000002C10 gene                                                                                                                                                                    | -1.57 |
| 1429173_at   | <i>Dnase1l1</i>                                              | deoxyribonuclease 1-like 1                                                                                                                                                                    | -1.57 |
| 1448121_at   | <i>Wbp2</i>                                                  | WW domain binding protein 2                                                                                                                                                                   | -1.57 |
| 1436845_at   | <i>Axin2</i>                                                 | axin2                                                                                                                                                                                         | -1.57 |

|              |                               |                                                                                                                  |       |
|--------------|-------------------------------|------------------------------------------------------------------------------------------------------------------|-------|
| 1427057_at   | <i>C630002B14Rik</i>          | RIKEN cDNA C630002B14 gene                                                                                       | -1.57 |
| 1429352_at   | <i>Mocos</i>                  | molybdenum cofactor sulfurase                                                                                    | -1.56 |
| 1456586_x_at | <i>Mvp</i>                    | major vault protein                                                                                              | -1.56 |
| 1416655_at   | <i>C1galt1c1</i>              | C1GALT1-specific chaperone 1                                                                                     | -1.56 |
| 1434061_at   | <i>Rp2h</i>                   | retinitis pigmentosa 2 homolog (human)                                                                           | -1.56 |
| 1416279_at   | <i>Ap1b1</i>                  | adaptor protein complex AP-1, beta 1 subunit                                                                     | -1.56 |
| 1453052_at   | <i>3110005G23Rik</i>          | RIKEN cDNA 3110005G23 gene                                                                                       | -1.56 |
| 1417405_at   | <i>Stard3</i>                 | START domain containing 3                                                                                        | -1.56 |
| 1435526_at   | <i>Tor1aip2</i>               | torsin A interacting protein 2                                                                                   | -1.56 |
| 1443077_at   | <i>1700081L11Rik</i>          | RIKEN cDNA 1700081L11 gene                                                                                       | -1.56 |
| 1456213_x_at | <i>Qars</i>                   | glutaminyl-tRNA synthetase                                                                                       | -1.56 |
| 1419883_s_at | <i>Atp6v1b2</i>               | ATPase, H <sup>+</sup> transporting, lysosomal V1 subunit B2                                                     | -1.56 |
| 1449614_s_at | <i>AI314976 /// LOC672876</i> | expressed sequence AI314976 /// similar to Protein C6orf130 homolog                                              | -1.56 |
| 1426994_at   | <i>Phlpp</i>                  | PH domain and leucine rich repeat protein phosphatase                                                            | -1.55 |
| 1438934_x_at | <i>Sema4a</i>                 | sema domain, immunoglobulin domain (Ig), transmembrane domain (TM) and short cytoplasmic domain, (semaphorin) 4A | -1.55 |
| 1438905_x_at | <i>C030046I01Rik</i>          | RIKEN cDNA C030046I01 gene                                                                                       | -1.55 |
| 1426992_at   | <i>Xpr1</i>                   | xenotropic and polytropic retrovirus receptor 1                                                                  | -1.55 |
| 1446031_at   | <i>Thrap3</i>                 | Thyroid hormone receptor associated protein 3                                                                    | -1.55 |
| 1441506_at   | <i>Dcn</i>                    | decorin                                                                                                          | -1.55 |
| 1426227_s_at | <i>Vps37c</i>                 | vacuolar protein sorting 37C (yeast)                                                                             | -1.55 |
| 1419447_s_at | <i>Tbc1d1</i>                 | TBC1 domain family, member 1                                                                                     | -1.55 |
| 1459593_x_at | <i>LOC669005</i>              | similar to NFkB interacting protein 1                                                                            | -1.55 |
| 1454824_s_at | <i>Mtus1</i>                  | mitochondrial tumor suppressor 1                                                                                 | -1.55 |
| 1456874_at   | <i>Flrt2</i>                  | fibronectin leucine rich transmembrane protein 2                                                                 | -1.55 |
| 1456012_x_at | <i>Rnaset2</i>                | ribonuclease T2                                                                                                  | -1.55 |
| 1448129_at   | <i>Arpc5</i>                  | actin related protein 2/3 complex, subunit 5                                                                     | -1.55 |
| 1424085_at   | <i>Ndufa4</i>                 | NADH dehydrogenase (ubiquinone) 1 alpha subcomplex, 4                                                            | -1.55 |
| 1416440_at   | <i>Cd164</i>                  | CD164 antigen                                                                                                    | -1.54 |
| 1436304_at   | <i>C030003D03Rik</i>          | RIKEN cDNA C030003D03 gene                                                                                       | -1.54 |
| 1430857_s_at | <i>Pex11c</i>                 | peroxisomal biogenesis factor 11c                                                                                | -1.54 |
| 1440977_at   | <i>Akap13</i>                 | A kinase (PRKA) anchor protein 13                                                                                | -1.54 |
| 1424531_a_at | <i>Tcea3</i>                  | transcription elongation factor A (SII), 3                                                                       | -1.54 |
| 1428724_at   | <i>Pcf11</i>                  | cleavage and polyadenylation factor subunit homolog ( <i>S. cerevisiae</i> )                                     | -1.54 |
| 1447874_x_at | <i>Smpd1</i>                  | sphingomyelin phosphodiesterase 1, acid lysosomal                                                                | -1.54 |
| 1451425_a_at | <i>Mkrm1</i>                  | makorin, ring finger protein, 1                                                                                  | -1.54 |
| 1460379_at   | <i>Hoxb4</i>                  | homeo box B4                                                                                                     | -1.54 |
| 1417203_at   | <i>Ethe1</i>                  | ethylmalonic encephalopathy 1                                                                                    | -1.54 |
| 1417110_at   | <i>Man1a</i>                  | mannosidase 1, alpha                                                                                             | -1.54 |
| 1459879_at   | <i>4921513D23Rik</i>          | RIKEN cDNA 4921513D23 gene                                                                                       | -1.53 |
| 1456227_x_at | <i>Rbbp7</i>                  | retinoblastoma binding protein 7                                                                                 | -1.53 |

|              |                              |                                                                                   |       |
|--------------|------------------------------|-----------------------------------------------------------------------------------|-------|
| 1426733_at   | <i>Itpk1</i>                 | inositol 1,3,4-triphosphate 5/6 kinase                                            | -1.53 |
| 1447929_at   | <i>Ssh3</i>                  | slingshot homolog 3 (Drosophila)                                                  | -1.53 |
| 1455458_x_at | <i>Gmppa</i>                 | GDP-mannose pyrophosphorylase A                                                   | -1.53 |
| 1423729_a_at | <i>2500002L14Rik</i>         | RIKEN cDNA 2500002L14 gene                                                        | -1.53 |
| 1456624_at   | <i>Wipi1</i>                 | WD repeat domain, phosphoinositide interacting 1                                  | -1.53 |
| 1430148_at   | <i>Rab19</i>                 | RAB19, member RAS oncogene family                                                 | -1.53 |
| 1444235_at   | <i>1700025G04Rik</i>         | RIKEN cDNA 1700025G04 gene                                                        | -1.53 |
| 1425536_at   | <i>Stx3</i>                  | syntaxin 3                                                                        | -1.53 |
| 1457924_at   | <i>Mbnl1</i>                 | muscleblind-like 1 (Drosophila)                                                   | -1.52 |
| 1456135_s_at | <i>Pxn</i>                   | paxillin                                                                          | -1.52 |
| 1434221_at   | <i>BC030863</i>              | cDNA sequence BC030863                                                            | -1.52 |
| 1451311_a_at | <i>Adipor1</i>               | adiponectin receptor 1                                                            | -1.52 |
| 1452060_a_at | <i>Limk2</i>                 | LIM motif-containing protein kinase 2                                             | -1.52 |
| 1455179_at   | <i>Mpp7</i>                  | membrane protein, palmitoylated 7 (MAGUK p55 subfamily member 7)                  | -1.52 |
| 1453021_at   | <i>Stxbp5</i>                | syntaxin binding protein 5 (tomosyn)                                              | -1.52 |
| 1456726_x_at | <i>Qars</i>                  | glutaminyl-tRNA synthetase                                                        | -1.52 |
| 1433420_at   | <i>4930527J03Rik</i>         | RIKEN cDNA 4930527J03 gene                                                        | -1.52 |
| 1426564_at   | <i>Zfp553</i>                | zinc finger protein 553                                                           | -1.52 |
| 1451114_at   | <i>Cmtm6</i>                 | CKLF-like MARVEL transmembrane domain containing 6                                | -1.52 |
| 1456846_at   | <i>LOC382639</i>             | similar to RP58 protein                                                           | -1.52 |
| 1429550_at   | <i>Entpd8</i>                | ectonucleoside triphosphate diphosphohydrolase 8                                  | -1.52 |
| 1448101_s_at | <i>Trim27</i>                | tripartite motif protein 27                                                       | -1.52 |
| 1447297_at   | <i>Slc25a36</i>              | Solute carrier family 25, member 36                                               | -1.51 |
| 1441475_at   | <i>Ptk2</i>                  | PTK2 protein tyrosine kinase 2                                                    | -1.51 |
| 1428490_at   | <i>C1galt1</i>               | core 1 UDP-galactose:N-acetylgalactosamine-alpha-R beta 1,3-galactosyltransferase | -1.51 |
| 1419879_s_at | <i>Trim25</i>                | tripartite motif protein 25                                                       | -1.51 |
| 1435648_at   | <i>B430119L13Rik</i>         | RIKEN cDNA B430119L13 gene                                                        | -1.51 |
| 1428319_at   | <i>Pdlim7</i>                | PDZ and LIM domain 7                                                              | -1.51 |
| 1433898_at   | <i>AV025504</i>              | Expressed sequence AV025504                                                       | -1.51 |
| 1438235_at   | ---                          | ---                                                                               | -1.51 |
| 1418978_at   | <i>Sap30bp /// LOC639905</i> | SAP30 binding protein /// similar to transcriptional regulator protein            | -1.51 |
| 1416804_at   | <i>G430002G23Rik</i>         | RIKEN cDNA G430002G23 gene                                                        | -1.50 |
| 1426258_at   | <i>Sorl1</i>                 | sortilin-related receptor, LDLR class A repeats-containing                        | -1.50 |
| 1437619_x_at | <i>Ddr1</i>                  | discoidin domain receptor family, member 1                                        | -1.50 |
| 1437073_x_at | <i>AV025504</i>              | expressed sequence AV025504                                                       | -1.50 |
| 1428131_a_at | <i>Cdc42se1</i>              | CDC42 small effector 1                                                            | -1.50 |

**Franco et al., Supplemental Table S4. Pathways Differentially Regulated by Smo Activation.**

| Term                                      | P-Value  | Molecules                                                                                                                                                                                                                                                                                                                                                                                                                                                |
|-------------------------------------------|----------|----------------------------------------------------------------------------------------------------------------------------------------------------------------------------------------------------------------------------------------------------------------------------------------------------------------------------------------------------------------------------------------------------------------------------------------------------------|
| Leukocyte Extravasation Signaling         | 7.08E-07 | <i>MSN, MMP3, PIK3CG, TIMP3, PRKD1, MAPK12, CLDN10, PXN, TIMP1, PRKCZ, MMP19, WIPF1, CLDN2, CLDN23, MMP15, CLDN11, CD44, EZR, ACTC1, ROCK2, CXCL12, SRC, PIK3C2A, JAM3, CDH5, PIK3CB, MMP17, DLC1, ACTG2 (includes EG:11468), CLDN3, VAV3, BMX, RAPGEF3, CLDN4, CLDN1, PTK2B, THY1, PLCG2, RASSF5, RAP1GAP (includes EG:5909), MAPK13</i>                                                                                                                |
| Wnt/ $\beta$ -catenin Signaling           | 1.32E-05 | <i>WIF1, WNT5A, CDH1, AKT3, DKK3, WNT5B, CDH2, BCL9, FZD1, TGFBR2, MYC, SOX9, TLE4, CD44, LRP1, GJA1, WNT9A, TCF3, SRC, SOX5 (includes EG:6660), SFRP1, CDH5, SMO, TCF4, FZD2, FRZB, FZD5, WNT2, SOX12, LEF1, TGFB3, RARG, ACVR1B, AXIN2</i>                                                                                                                                                                                                             |
| Axonal Guidance Signaling                 | 1.70E-05 | <i>PIK3CG, WNT5A, GNB4, GNA11, MAPK12, NTNG1, ABLIM1, AKT3, PXN, NFATC4, PTCH1, PRKCZ, CHP, FZD1, GNA14, EFNB3, PFN2, SDCBP, GLI1, LIMK1, ADAM9, ROCK2, CXCL12, SEMA3A, PDGFD, GNAZ, FZD2, SEMA4D, PLXNA2, EPHA4, SLIT3, RASSF5, BMP4, PRKD1, EFNB1, LIMK2, EPHA3, WNT5B, GNG12, GLIS2, HHIP, SEMA3G, WIPF1, IGF1, MRAS, SEMA4A, ARPC5, BMP7, PDGFA, GNG11, NRP1, WNT9A, GLI3, SLIT2, ADAM17, PIK3C2A, SMO, PIK3CB, FZD5, WNT2, PDGFC, NFATC2, PTCH2</i> |
| Basal Cell Carcinoma Signaling            | 4.07E-05 | <i>WNT9A, GLI3, WNT5A, PTCH1, WNT5B, TCF7, SMO, GLIS2, HHIP, FZD2, FZD1, GLI1, WNT2, FZD5, LEF1, PTCH2, BMP7, BMP4</i>                                                                                                                                                                                                                                                                                                                                   |
| Germ Cell-Sertoli Cell Junction Signaling | 6.31E-05 | <i>PIK3CG, LAMC3, MAPK12, CDH1, LIMK2, PXN, PLS1, CDH2, PVRL2, JUP, MTMR2, TGFBR2, MRAS, LIMK1, PPAP2B, ACTC1, A2M, TUBA1A, MAP2K6, SRC, PIK3C2A, EPN2, PIK3CB, RHOB, ACTG2 (includes EG:11468), PVRL3, RHOU, CLINT1, MAP3K1, RHOJ, TGFB3</i>                                                                                                                                                                                                            |
| Molecular Mechanisms of Cancer            | 1.17E-04 | <i>PIK3CG, WNT5A, GNA11, MAPK12, CCND2, ADCY4, AKT3, CDKN1A, PTCH1, PRKCZ, HIPK2, GNA14, FZD1, MYC, TGFBR2, CASP7, GLI1, NAIP, TCF3, MAP2K6, RALBP1, SRC, ARHGEF10, GNAZ, RALGDS, E2F6, TCF4, FZD2, CASP8, RAP2A, RAPGEF3, RHOJ, ARHGEF16, BMP4, RAPGEF1, ARHGEF3, PRKD1, CDH1, ADCY7, MRAS, BRAF, BMP7, CDKN2C, LRP1, CDK4, JAK2, PIK3C2A, SMO, PIK3CB, RHOB, IRS1, JAK1, RHOU, FZD5, PTCH2, LEF1, TGFB3, MAPK13</i>                                    |
| Endothelin-1 Signaling                    | 2.82E-04 | <i>PIK3CG, GNA11, PRKD1, MAPK12, NOS1, ADCY4, SHC2, HMOX1, PRKCZ, ADCY7, GNA14, MYC, CASP7, PLA2G4A, ILDR1, TMEM87B, MRAS, BRAF, CASP1, SRC, PIK3C2A, GNAZ, ITPR3, PIK3CB, PTGER2, EDNRA, NAPEPLD, CASP8, GPLD1, PLCD1, PLCG2, MAPK13</i>                                                                                                                                                                                                                |



|                                          |          |                                                                                                                                                                                                                                                                     |
|------------------------------------------|----------|---------------------------------------------------------------------------------------------------------------------------------------------------------------------------------------------------------------------------------------------------------------------|
| Pentose and glucuronate interconversions | 3.40E-04 | <i>RPE, XYLB, AKR1B3, AKR1B8, UGT1A5, UGT1A6B, UGT1A2, UGT1A6A, UGT1A10, UGT1A7C, UGT1A9, DCXR</i>                                                                                                                                                                  |
| Human Embryonic Stem Cell Pluripotency   | 4.68E-04 | <i>PDGFA, PIK3CG, WNT9A, WNT5A, AKT3, PIK3C2A, PDGFD, S1PR2, FGFR1, WNT5B, TCF7, SMO, PIK3CB, FZD2, FZD1, TGFB2, FZD5, WNT2, MRAS, PDGFC, LEF1, BMP7, TGFB3, BMP4</i>                                                                                               |
| Glioma Signaling                         | 1.66E-03 | <i>PDGFA, PIK3CG, CDK4, PRKD1, MAPK12, AKT3, PIK3C2A, PDGFD, CDKN1A, EGFR, E2F6, PIK3CB, PRKCZ, CAMK1G, IGF1, MRAS, CAMK1, PDGFC, CDKN2C, PLCG2</i>                                                                                                                 |
| Leukocyte transendothelial migration     | 1.70E-03 | <i>CXCL12, CDH5, PRKCB1, ITGB1, PTK2, RASSF5, MSN, PLCG2, CD99, RAPGEF3, CLDN23, PIK3CB, EZR, ESAM1, OCLN, ROCK2, CLDN4, CTNND1, IGTB2L, CXCR4, MAPK12, JAM3, CLDN1, PKCG, CLDN2, CLDN3, PXN, CTNNA1, THY1, PIK3CG, ITGAM, CLDN10, VAV3, MAPK13, CLDN18, CLDN10</i> |
| Glutamate Metabolism                     | 1.86E-03 | <i>GLUD1, QARS, GLUL, ABAT, MYO5B, GMPS, GFPT2, ALDH5A1, GFPT1, NAGK</i>                                                                                                                                                                                            |
| Prolactin Signaling                      | 2.29E-03 | <i>PIK3CG, PRKD1, MAPK12, JAK2, PIK3C2A, PDK1, TCF7, PRKCZ, PIK3CB, PRLR, IRS1, MYC, NR3C1, MRAS, SOCS2, PLCG2</i>                                                                                                                                                  |
| Thrombin Signaling                       | 2.40E-03 | <i>PIK3CG, ARHGEF3, GNB4, GNA11, PRKD1, MAPK12, ADCY4, AKT3, EGFR, GNG12, PRKCZ, ADCY7, GNA14, CAMK1G, MRAS, GATA6, F2R, GNG11, ROCK2, SRC, PIK3C2A, ARHGEF10, GNAZ, ITPR3, PIK3CB, RHOB, RHOU, CAMK1, PLCD1, RHOJ, PLCG2, ARHGEF16, MAPK13</i>                     |
| Basal cell carcinoma                     | 2.40E-03 | <i>WNT5B, FZD2, WNT16, AXIN2, TCF7, PTCH1, WNT5A, GLI1, FZD1, HHIP, BMP4, SMO, PTCH2, WNT9A, WNT2, LEF1, GLI3, TCF3</i>                                                                                                                                             |
| Nitrogen metabolism                      | 2.70E-03 | <i>CAR5B, CAR9, CAR12, GLUD1, CTH, GLUL, CAR2, CAR3, ASRGL1, HAL</i>                                                                                                                                                                                                |
| Tight Junction Signaling                 | 2.82E-03 | <i>MYH11, MPP5, EPB41, AKT3, CLDN10, MPDZ, PVRL2, PRKCZ, TGFB2, CLDN2, CLDN23, CLDN11, TJP3, IGSF5, OCLN, ACTC1, CDK4, JAM3, CGN, ACTG2 (includes EG:11468), PVRL3, CLDN3, NUDT21, CLDN4, CLDN1, CRB3, TGFB3</i>                                                    |
| Growth Hormone Signaling                 | 2.82E-03 | <i>PIK3CG, A2M, PRKD1, MAPK12, RPS6KA6, JAK2, PIK3C2A, RPS6KA3, PRKCZ, PIK3CB, IRS1, IGF1, SOCS2, PLCG2, IGFBP3</i>                                                                                                                                                 |
| IL-8 Signaling                           | 3.16E-03 | <i>PIK3CG, GNB4, PRKD1, MAPK12, CDH1, CCND2, LIMK2, AKT3, IRAK4, EGFR, HMOX1, GNG12, PRKCZ, ITGAX, MRAS, BRAF, LIMK1, GNG11, ROCK2, SRC, PIK3C2A, PIK3CB, RHOB, NAPEPLD, RHOU, GPLD1, PTK2B, RHOJ, MAP4K4</i>                                                       |
| HGF Signaling                            | 3.89E-03 | <i>PIK3CG, RAPGEF1, HGF, PRKD1, MAPK12, AKT3, PXN, PIK3C2A, CDKN1A, ETS1, PIK3CB, PRKCZ, ETS2, ELF3, MRAS, MAP3K1, PLCG2, MET</i>                                                                                                                                   |

|                                                                 |          |                                                                                                                                                                                                                                                                 |
|-----------------------------------------------------------------|----------|-----------------------------------------------------------------------------------------------------------------------------------------------------------------------------------------------------------------------------------------------------------------|
| Ephrin Receptor Signaling                                       | 4.57E-03 | <i>PIK3CG, RAPGEF1, GNB4, GNA11, EFN1, MAPK12, LIMK2, AKT3, PXN, EPHA3, GNG12, GNA14, EFN3, WIPF1, SDCBP, MRAS, ARPC5, LIMK1, PDGFA, GNG11, ROCK2, CXCL12, JAK2, SRC, PDGFD, GNAZ, PDGFC, EPHA4, MAP4K4</i>                                                     |
| Arginine and Proline Metabolism                                 | 5.13E-03 | <i>MAOB, SAT1, NOS1, ARG2, LAP3, CKMT1B, LOXL1, ALDH5A1, AOC3, SMOX, GLUD1, CNDP1, ASL, ABP1, P4HA3, MAOA</i>                                                                                                                                                   |
| CXCR4 Signaling                                                 | 5.50E-03 | <i>PIK3CG, LYN, GNB4, GNA11, PRKD1, MAPK12, AKT3, ADCY4, PXN, GNG12, PRKCZ, ADCY7, GNA14, MRAS, ELMO3, GNG11, ROCK2, CXCL12, SRC, PIK3C2A, GNAZ, ITPR3, PIK3CB, RHOB, RHOU, ELMO2, RHOJ</i>                                                                     |
| Macropinocytosis                                                | 5.50E-03 | <i>PDGFA, PIK3CG, HGF, PRKD1, SRC, PIK3C2A, PDGFD, RAB34, PRKCZ, PIK3CB, PDGFC, MRAS, PLCG2, MET</i>                                                                                                                                                            |
| Acute Myeloid Leukemia Signaling                                | 5.89E-03 | <i>PIK3CG, MAPK12, MAP2K6, PIK3C2A, AKT3, FLT3LG, TCF7, JUP, PIK3CB, MYC, MRAS, BRAF, LEF1, PML, KIT</i>                                                                                                                                                        |
| Antiproliferative Role of Somatostatin Receptor 2               | 6.76E-03 | <i>PIK3CG, GNG11, GNB4, MAPK12, NOS1, SRC, PIK3C2A, ADCY4, CDKN1A, GNG12, PIK3CB, ADCY7, MRAS, BRAF, NPR1</i>                                                                                                                                                   |
| Role of NANOG in Mammalian Embryonic Stem Cell Pluripotency     | 7.08E-03 | <i>PIK3CG, WNT9A, WNT5A, MAPK12, JAK2, AKT3, PIK3C2A, WNT5B, SMO, PIK3CB, RIF1, FZD2, JAK1, FZD1, FZD5, WNT2, MRAS, BMP7, GATA6, BMP4</i>                                                                                                                       |
| Nitrogen Metabolism                                             | 8.13E-03 | <i>CCBL1, CA12, HAL, GLUD1, GLUL, CA3, LOXL1, CA5B, CA2, CA9</i>                                                                                                                                                                                                |
| Semaphorin Signaling in Neurons                                 | 8.71E-03 | <i>RHOB, ROCK2, NRP1, RHOU, SEMA4D, MAPK12, SEMA3A, LIMK2, RHOJ, CRMP1, LIMK1, MET</i>                                                                                                                                                                          |
| Adherens junction                                               | 8.80E-03 | <i>PVRL3, TGFB2, PVRL4, TCF7, PTPRF, PTPRJ, PVRL2, FGFR1, WASL, CTNNA1, IGF1R, PARD3, EGFR, ACVR1B, SNAI1, SRC, CDH1, PTPRM, CTNND1, PTPRB, LEF1, TCF3</i>                                                                                                      |
| Toll-like Receptor Signaling                                    | 9.33E-03 | <i>TLR2, LY96, TLR1, MAPK12, MAP3K1, MAP2K6, TIRAP, ECSIT, IRAK4, MAP4K4, MAPK13</i>                                                                                                                                                                            |
| Tight junction                                                  | 1.10E-02 | <i>TJP3, MPDZ, PRKCB1, ASH1L, CGN, CDK4, PARD3, CLDN23, OCLN, CLDN4, SPNB2, SYMPK, PARD6B, CLDN1, JAM3, PRKCC, MRAS, CLDN2, PRKCH, EPB4.1, CLDN3, MYH11, PARD6G, LLGL2, CTNNA1, B230120H23Rik, CRB3, EXOC3, IGSF5, PRKCZ, SRC, CLDN11, MPP5, CLDN10, CLDN18</i> |
| Fcy Receptor-mediated Phagocytosis in Macrophages and Monocytes | 1.12E-02 | <i>PIK3CG, ACTC1, LYN, PRKD1, MAPK12, AKT3, SRC, PXN, HMOX1, PRKCZ, ACTG2 (includes EG:11468), NAPEPLD, VAV3, GPLD1, ARPC5, FGR, PTK2B, EZR</i>                                                                                                                 |
| Histidine Metabolism                                            | 1.15E-02 | <i>SMOX, HAL, AOC3, MAOB, CNDP1, ASPA (includes EG:443), ABP1, ALDH5A1, PRPS2, MAOA</i>                                                                                                                                                                         |
| Renin-Angiotensin Signaling                                     | 1.17E-02 | <i>PIK3CG, AGTR2, PRKD1, MAPK12, CCL5, JAK2, PIK3C2A, ADCY4, SHC2, ITPR3, PIK3CB, PRKCZ, ADCY7, PTGER2, MRAS, MAP3K1, PTK2B, PLCG2, MAPK13</i>                                                                                                                  |

|                                            |          |                                                                                                                                                                                                                                                              |
|--------------------------------------------|----------|--------------------------------------------------------------------------------------------------------------------------------------------------------------------------------------------------------------------------------------------------------------|
| Hedgehog signaling pathway                 | 1.20E-02 | <i>WNT5B, WNT16, GAS1, PTCH1, WNT5A, RAB23, GLI3, HHIP, SMO, BMP4, CSNK1G2, PTCH2, BMP7, WNT9A, WNT2, GLI1</i>                                                                                                                                               |
| PDGF Signaling                             | 1.41E-02 | <i>PDGFA, PIK3CG, MAPK12, JAK2, SRC, PIK3C2A, PDGFD, PIK3CB, JAK1, MYC, MAP3K1, PDGFC, MRAS, PLCG2</i>                                                                                                                                                       |
| FcyRIIB Signaling in B Lymphocytes         | 1.45E-02 | <i>PIK3CB, PIK3CG, CD79B, LYN, MAPK12, MRAS, PIK3C2A, PLCG2, BLNK</i>                                                                                                                                                                                        |
| Eicosanoid Metabolism                      | 1.70E-02 | <i>PTGES3, PTGIS, PTGFR, PTGER4, PTGER3, PTGER2, ALOX5AP</i>                                                                                                                                                                                                 |
| Amyotrophic Lateral Sclerosis Signaling    | 1.74E-02 | <i>GRIA1, NAIP, PIK3CG, NOS1, CAPN5, PIK3C2A, AKT3, GPX1, PIK3CB, GLUL, IGF1, CASP7, GRIA4, GDNF, CASP1, GRIA2</i>                                                                                                                                           |
| p53 Signaling                              | 1.74E-02 | <i>PIK3CG, GADD45A, CDK4, PIK3C2A, CCND2, STAG1, AKT3, JMY, CDKN1A, PLAGL1, PIK3CB, HIPK2, SERPINE2, DRAM (includes EG:55332), TP63, TP53BP2</i>                                                                                                             |
| Chemokine Signaling                        | 1.78E-02 | <i>PIK3CG, ROCK2, CXCL12, MAPK12, CCL5, SRC, LIMK2, CAMK1G, MRAS, CAMK1, PTK2B, LIMK1, PLCG2, MAPK13</i>                                                                                                                                                     |
| Cardiac Hypertrophy Signaling              | 1.95E-02 | <i>PIK3CG, EIF2B3, GNB4, GNA11, MAPK12, HAND2, ADCY4, NFATC4, MEF2A (includes EG:4205), GNG12, CHP, ADCY7, GNA14, IGF1, TGFBR2, MRAS, GNG11, ROCK2, MAP2K6, PIK3C2A, GNAZ, PIK3CB, IRS1, RHOB, RHOU, MAPKAPK3, MAP3K1, PLCD1, RHOJ, TGFB3, PLCG2, MAPK13</i> |
| Porphyrin and chlorophyll metabolism       | 2.10E-02 | <i>UGT1A2, UGT1A6A, UGT1A10, HMOX1, EPRS, UGT1A5, UGT1A6B, UGT1A7C, CP, HCCS,</i>                                                                                                                                                                            |
| Selenoamino Acid Metabolism                | 2.19E-02 | <i>SEPHS1, SCLY, AHCY, GGT5, ACSS2, AHCYL2</i>                                                                                                                                                                                                               |
| Sonic Hedgehog Signaling                   | 2.24E-02 | <i>GLIS2, HHIP, GLI3, GLI1, PTCH2, PTCH1, SMO</i>                                                                                                                                                                                                            |
| RAR Activation                             | 2.45E-02 | <i>PIK3CG, PARP1, CDK7, PRKD1, RDH10, MAPK12, AKT3, ADCY4, PRKCZ, ADCY7, RBP4, NCOA1, CITED2, NR2F1, NR2F2, JAK2, SRC, PIK3CB, MAP3K1, LRAT, RARG, TGFB3, PML, MAPK13, IGFBP3</i>                                                                            |
| Cholecystokinin/Gastrin-mediated Signaling | 2.45E-02 | <i>IL1F8, ROCK2, PRKD1, MAPK12, MAP2K6, SRC, PXN, EGFR, MEF2A (includes EG:4205), ITPR3, PRKCZ, RHOB, RHOU, MRAS, EPHA4, PTK2B, RHOJ</i>                                                                                                                     |
| Renal Cell Carcinoma Signaling             | 2.51E-02 | <i>PIK3CG, SLC2A1, HGF, RAPGEF1, MAPK12, PIK3C2A, AKT3, ETS1, PIK3CB, EGLN3, MRAS, TGFA, MET</i>                                                                                                                                                             |
| Coagulation System                         | 2.51E-02 | <i>F2R, BDKRB2, A2M, TFPI, F5, VWF, F13A1, THBD</i>                                                                                                                                                                                                          |
| Melanoma Signaling                         | 2.69E-02 | <i>PIK3CB, PIK3CG, CDK4, MAPK12, MRAS, AKT3, PIK3C2A, BRAF, CDKN1A</i>                                                                                                                                                                                       |
| VDR/RXR Activation                         | 2.69E-02 | <i>PDGFA, HR, GADD45A, PRKD1, CCL5, CDKN1A, PRKCZ, HOXA10, NCOA1, TRPV6, MXD1, IGFBP6, THBD, IGFBP3</i>                                                                                                                                                      |
| Virus Entry via Endocytic Pathways         | 2.88E-02 | <i>DNM2, AP1B1, PIK3CG, ACTC1, CD55, HLA-C, PRKD1, SRC, PIK3C2A, CXADR, AP1G2, PRKCZ, PIK3CB, ACTG2 (includes EG:11468), MRAS, PLCG2</i>                                                                                                                     |

|                                                   |          |                                                                                                                                                                                                        |
|---------------------------------------------------|----------|--------------------------------------------------------------------------------------------------------------------------------------------------------------------------------------------------------|
| Integrin Signaling                                | 3.02E-02 | <i>PIK3CG, RAPGEF1, MAPK12, TSPAN6, CAPN5, AKT3, TSPAN3, PXN, WIPF1, ITGAX, MRAS, GRB7, BRAF, ARPC5, ITGAE, BCAR3, ACTC1, TSPAN4, SRC, PIK3C2A, TNK2, ARF2, PIK3CB, RHOB, RHOU, RAP2A, RHOJ, PLCG2</i> |
| IL-17 Signaling                                   | 3.09E-02 | <i>MMP3, PIK3CG, CRP (includes EG:1401), MAPK12, MAP2K6, JAK2, PIK3C2A, AKT3, TIMP1, PIK3CB, JAK1, MRAS, MAPK13</i>                                                                                    |
| IL-4 Signaling                                    | 3.16E-02 | <i>PIK3CB, IRS1, PIK3CG, IL13RA1, JAK1, NR3C1, MRAS, JAK2, NFATC2, AKT3, PIK3C2A, NFATC4</i>                                                                                                           |
| Relaxin Signaling                                 | 3.24E-02 | <i>PIK3CG, PDE1A, GNG11, GNB4, GNA11, MAPK12, AKT3, PIK3C2A, ADCY4, PDE4B, GNAZ, GNG12, PIK3CB, PRKCZ, ADCY7, GNA14, BRAF, PDE3B, NPR1, PDE7A</i>                                                      |
| HIF1 $\alpha$ Signaling                           | 3.39E-02 | <i>MMP3, EGLN1, PIK3CG, SLC2A1, P4HTM, MAPK12, NOS1, AKT3, PIK3C2A, MMP17, PIK3CB, MMP19, EGLN3, NCOA1, MRAS, MMP15, MAPK13</i>                                                                        |
| Factors Promoting Cardiogenesis in Vertebrates    | 3.63E-02 | <i>PRKD1, TCF7, SMO, PRKCZ, FZD1, FZD2, TGFB2, FZD5, LEF1, BMP7, ACVR1B, TGFB3, BMP4, LRP1</i>                                                                                                         |
| Glycerophospholipid Metabolism                    | 3.72E-02 | <i>PPAP2C, PLA1A, GPD1, PCYT1B, LPCAT1, LPIN2, HMOX1, CHPT1, CHKA, NAPEPLD, PLA2G4A, TMEM87B, ILDR1, GPLD1, PTDSS2, PLCD1, PLCG2, GPD1L, PPAP2B</i>                                                    |
| Neuregulin Signaling                              | 3.80E-02 | <i>BTC, PRKD1, MAPK12, ERBB3, SRC, ADAM17, AKT3, EGFR, DCN, PRKCZ, MYC, GRB7, MRAS, TGFA, PLCG2</i>                                                                                                    |
| IGF-1 Signaling                                   | 3.80E-02 | <i>PIK3CG, MAPK12, AKT3, PXN, PIK3C2A, PIK3CB, PRKCZ, IRS1, IGF1, MRAS, GRB10, IGFBP7, IGFBP6, IGFBP4, IGFBP3</i>                                                                                      |
| Thyroid Cancer Signaling                          | 3.98E-02 | <i>MYC, MAPK12, MRAS, CDH1, LEF1, GDNF, BRAF, TCF7</i>                                                                                                                                                 |
| Corticotropin Releasing Hormone Signaling         | 4.17E-02 | <i>GLI3, PRKD1, MAPK12, NOS1, ADCY4, MEF2A (includes EG:4205), ITPR3, PTCH1, SMO, PRKCZ, ADCY7, GLI1, ARPC5, PTCH2, BRAF, NPR1, PLCG2, MAPK13</i>                                                      |
| Neuropathic Pain Signaling In Dorsal Horn Neurons | 4.37E-02 | <i>GRIA1, PIK3CG, PRKD1, MAPK12, SRC, PIK3C2A, ITPR3, PIK3CB, PRKCZ, CAMK1G, KCNH2, CAMK1, PLCD1, GRIA2, PLCG2, KCNN4</i>                                                                              |
| Synaptic Long Term Depression                     | 4.68E-02 | <i>GRIA1, LYN, PRKD1, GNA11, MAPK12, NOS1, ADCY4, GNAZ, ITPR3, PRKCZ, ADCY7, GNA14, IGF1, PLA2G4A, TMEM87B, ILDR1, MRAS, GRIA2, NPR1, PRKG2, RYR3</i>                                                  |
| IL-15 Production                                  | 4.79E-02 | <i>PRKCZ, JAK1, IL15, JAK2, FRK, PTK2B</i>                                                                                                                                                             |
| JAK/Stat Signaling                                | 4.90E-02 | <i>PIK3CB, PIAS1, PIK3CG, JAK1, MAPK12, MRAS, JAK2, AKT3, PIK3C2A, CDKN1A, SOCS2</i>                                                                                                                   |
| Fructose and mannose metabolism                   | 4.90E-02 | <i>ALDOB, AKR1B3, PFKL, SORD, MPI, GMDS, AKR1B8, MTMR2, PGM1, ALDOART1, KHK, PFKFB3, HK2</i>                                                                                                           |
| Melanoma                                          | 5.00E-02 | <i>BRAF, FGF8, RAF1, PDGFC, IGF1, FGFR1, E2F1, FGF9, CDKN1A, CDK4, HGF, IGF1R, PIK3CG, EGFR, FGF7, CDK6, PIK3CB, CDH1, PDGFA, PDGFD</i>                                                                |

**Franco et al., Supplemental Table S5. Chondrocytic Signature in SmoM2 Uterus.  
Increased**

| <b>Gene Symbol</b> | <b>Gene Name</b>                                                                 |
|--------------------|----------------------------------------------------------------------------------|
| <i>ADD3</i>        | adducin 3 (gamma)                                                                |
| <i>AKT3</i>        | v-akt murine thymoma viral oncogene homolog 3 (protein kinase B, gamma)          |
| <i>ALS2CR19</i>    | amyotrophic lateral sclerosis 2 (juvenile) chromosome region, candidate 19       |
| <i>APCDD1</i>      | adenomatosis polyposis coli down-regulated 1                                     |
| <i>APOD</i>        | apolipoprotein D                                                                 |
| <i>APRIN</i>       | androgen-induced proliferation inhibitor                                         |
| <i>ARHGEF10</i>    | Rho guanine nucleotide exchange factor (GEF) 10                                  |
| <i>ARL4A</i>       | ADP-ribosylation factor-like 4A                                                  |
| <i>BAALC</i>       | brain and acute leukemia, cytoplasmic                                            |
| <i>BTF3L4</i>      | basic transcription factor 3-like 4                                              |
| <i>C20orf121</i>   | chromosome 20 open reading frame 121                                             |
| <i>C21orf91</i>    | chromosome 21 open reading frame 91                                              |
| <i>C3orf64</i>     | chromosome 3 open reading frame 64                                               |
| <i>C9orf19</i>     | chromosome 9 open reading frame 19                                               |
| <i>CALCRL</i>      | calcitonin receptor-like                                                         |
| <i>CAST</i>        | Calpastatin                                                                      |
| <i>CCDC8</i>       | coiled-coil domain containing 8                                                  |
| <i>CCDC91</i>      | Coiled-coil domain containing 91                                                 |
| <i>CCND2</i>       | Cyclin D2                                                                        |
| <i>CD302</i>       | CD302 molecule                                                                   |
| <i>COL11A1</i>     | collagen, type XI, alpha 1                                                       |
| <i>CRTAP</i>       | cartilage associated protein                                                     |
| <i>CTR9</i>        | Ctr9, Paf1/RNA polymerase II complex component, homolog ( <i>S. cerevisiae</i> ) |
| <i>DC-UbP</i>      | dendritic cell-derived ubiquitin-like protein                                    |
| <i>DLEU8</i>       | Deleted in lymphocytic leukemia 8                                                |
| <i>E2F6</i>        | E2F transcription factor 6                                                       |
| <i>EBF</i>         | early B-cell factor                                                              |
| <i>EIF5A2</i>      | eukaryotic translation initiation factor 5A2                                     |
| <i>ENSA</i>        | endosulfine alpha                                                                |
| <i>FAH</i>         | fumarylacetoacetate hydrolase (fumarylacetoacetase)                              |
| <i>FAM125B</i>     | family with sequence similarity 125, member B                                    |
| <i>FKBP7</i>       | FK506 binding protein 7                                                          |
| <i>FLJ20366</i>    | hypothetical protein FLJ20366                                                    |
| <i>FLJ35779</i>    | hypothetical protein FLJ35779                                                    |
| <i>GLI3</i>        | GLI-Kruppel family member GLI3 (Greig cephalopolysyndactyly syndrome)            |
| <i>GLUL</i>        | glutamate-ammonia ligase (glutamine synthetase)                                  |
| <i>GPIAP1</i>      | GPI-anchored membrane protein 1                                                  |
| <i>GSTA4</i>       | glutathione S-transferase A4                                                     |
| <i>HPS3</i>        | Hermansky-Pudlak syndrome 3                                                      |
| <i>IFT80</i>       | intraflagellar transport 80 homolog ( <i>Chlamydomonas</i> )                     |
| <i>ING3</i>        | inhibitor of growth family, member 3                                             |
| <i>ITGBL1</i>      | Integrin, beta-like 1 (with EGF-like repeat domains)                             |
| <i>KLF12</i>       | Kruppel-like factor 12                                                           |
| <i>KLHDC5</i>      | kelch domain containing 5                                                        |
| <i>LAMA2</i>       | Laminin, alpha 2 (merosin, congenital muscular dystrophy)                        |
| <i>LARP7</i>       | La ribonucleoprotein domain family, member 7                                     |
| <i>MAOA</i>        | monoamine oxidase A                                                              |
| <i>MDS032</i>      | uncharacterized hematopoietic stem/progenitor cells protein MDS032               |

|                 |                                                                                                        |
|-----------------|--------------------------------------------------------------------------------------------------------|
| <i>NDFIP1</i>   | Nedd4 family interacting protein 1                                                                     |
| <i>NEXN</i>     | nexilin (F actin binding protein)                                                                      |
| <i>NID1</i>     | nidogen 1                                                                                              |
| <i>NUDT21</i>   | nudix (nucleoside diphosphate linked moiety X)-type motif 21                                           |
| <i>NUP107</i>   | nucleoporin 107kDa                                                                                     |
| <i>OMD</i>      | osteomodulin                                                                                           |
| <i>ORC3L</i>    | origin recognition complex, subunit 3-like (yeast)                                                     |
| <i>PCDH18</i>   | protocadherin 18                                                                                       |
| <i>PDE1A</i>    | phosphodiesterase 1A, calmodulin-dependent                                                             |
| <i>PDGFC</i>    | Platelet derived growth factor C                                                                       |
| <i>PIAS1</i>    | Protein inhibitor of activated STAT, 1                                                                 |
| <i>PKIA</i>     | Protein kinase (cAMP-dependent, catalytic) inhibitor alpha                                             |
| <i>PPM1F</i>    | protein phosphatase 1F (PP2C domain containing)                                                        |
| <i>PQLC3</i>    | PQ loop repeat containing 3                                                                            |
| <i>PRKD1</i>    | protein kinase D1                                                                                      |
| <i>PTGFR</i>    | prostaglandin F receptor (FP)                                                                          |
| <i>RPL22</i>    | ribosomal protein L22                                                                                  |
| <i>SART2</i>    | Squamous cell carcinoma antigen recognized by T cells 2                                                |
| <i>SEPHS1</i>   | selenophosphate synthetase 1                                                                           |
| <i>SERPINF1</i> | serpin peptidase inhibitor, clade F (alpha-2 antiplasmin, pigment epithelium derived factor), member 1 |
| <i>SERTAD4</i>  | SERTA domain containing 4                                                                              |
| <i>SHC2</i>     | SHC (Src homology 2 domain containing) transforming protein 2                                          |
| <i>SLC27A3</i>  | solute carrier family 27 (fatty acid transporter), member 3                                            |
| <i>SMOC2</i>    | SPARC related modular calcium binding 2                                                                |
| <i>SNAG1</i>    | sorting nexin associated golgi protein 1                                                               |
| <i>STAG1</i>    | stromal antigen 1                                                                                      |
| <i>TCF8</i>     | transcription factor 8 (represses interleukin 2 expression)                                            |
| <i>TLE4</i>     | transducin-like enhancer of split 4 (E(sp1) homolog, Drosophila)                                       |
| <i>TMEM100</i>  | transmembrane protein 100                                                                              |
| <i>TSHZ1</i>    | teashirt family zinc finger 1                                                                          |
| <i>USP1</i>     | ubiquitin specific peptidase 1                                                                         |
| <i>VIT</i>      | vitrin                                                                                                 |
| <i>WASPIP</i>   | Wiskott-Aldrich syndrome protein interacting protein                                                   |
| <i>ZMAT3</i>    | zinc finger, matrin type 3                                                                             |
| <i>ZNF423</i>   | zinc finger protein 423                                                                                |

### **Decreased**

| <b>Gene Symbol</b> | <b>Gene Name</b>                                                  |
|--------------------|-------------------------------------------------------------------|
| <i>ADAM9</i>       | ADAM metallopeptidase domain 9 (meltrin gamma)                    |
| <i>ADIPOR1</i>     | adiponectin receptor 1 /// adiponectin receptor 1                 |
| <i>ALPL</i>        | alkaline phosphatase, liver/bone/kidney                           |
| <i>ATP2C1</i>      | ATPase, Ca <sup>++</sup> transporting, type 2C, member 1          |
| <i>B4GALT1</i>     | UDP-Gal:betaGlcNAc beta 1,4- galactosyltransferase, polypeptide 1 |
| <i>C10orf10</i>    | chromosome 10 open reading frame 10                               |
| <i>C20orf112</i>   | Chromosome 20 open reading frame 112                              |
| <i>CD2AP</i>       | CD2-associated protein                                            |
| <i>COTL1</i>       | Coactosin-like 1 (Dictyostelium)                                  |
| <i>COX5A</i>       | cytochrome c oxidase subunit Va                                   |
| <i>DDR1</i>        | discoidin domain receptor family, member 1                        |
| <i>DERL3</i>       | Der1-like domain family, member 3                                 |
| <i>EGLN1</i>       | egl nine homolog 1 (C. elegans)                                   |

|                  |                                                                                        |
|------------------|----------------------------------------------------------------------------------------|
| <i>ETHE1</i>     | ethylmalonic encephalopathy 1                                                          |
| <i>ETS2</i>      | v-ets erythroblastosis virus E26 oncogene homolog 2 (avian)                            |
| <i>FAM101B</i>   | family with sequence similarity 101, member B                                          |
| <i>GLIS3</i>     | GLIS family zinc finger 3                                                              |
| <i>GPRC5A</i>    | G protein-coupled receptor, family C, group 5, member A                                |
| <i>HMOX1</i>     | heme oxygenase (decycling) 1                                                           |
| <i>HOMER1</i>    | homer homolog 1 (Drosophila)                                                           |
| <i>HOXB6</i>     | homeobox B6                                                                            |
| <i>IBRDC3</i>    | IBR domain containing 3                                                                |
| <i>IL13RA1</i>   | interleukin 13 receptor, alpha 1                                                       |
| <i>IVNS1ABP</i>  | influenza virus NS1A binding protein                                                   |
| <i>JUP</i>       | junction plakoglobin                                                                   |
| <i>KCNK1</i>     | Potassium channel, subfamily K, member 1                                               |
| <i>KIAA0319L</i> | KIAA0319-like                                                                          |
| <i>KIAA1539</i>  | KIAA1539                                                                               |
| <i>LDHD</i>      | lactate dehydrogenase D                                                                |
| <i>LOC150084</i> | hypothetical protein LOC150084                                                         |
| <i>MSX1</i>      | msh homeobox homolog 1 (Drosophila)                                                    |
| <i>MTMR2</i>     | myotubularin related protein 2                                                         |
| <i>MYH11</i>     | myosin, heavy polypeptide 11, smooth muscle                                            |
| <i>MYO5B</i>     | myosin VB                                                                              |
| <i>PDLIM7</i>    | PDZ and LIM domain 7 (enigma)                                                          |
| <i>PDXK</i>      | pyridoxal (pyridoxine, vitamin B6) kinase                                              |
| <i>PFKFB3</i>    | 6-phosphofructo-2-kinase/fructose-2,6-biphosphatase 3                                  |
| <i>PGM2</i>      | phosphoglucomutase 2                                                                   |
| <i>PML</i>       | promyelocytic leukemia                                                                 |
| <i>PRKCBP1</i>   | Protein kinase C binding protein 1                                                     |
| <i>PTP4A1</i>    | Protein tyrosine phosphatase type IVA, member 1                                        |
| <i>PVRL2</i>     | poliovirus receptor-related 2 (herpesvirus entry mediator B)                           |
| <i>RAB20</i>     | RAB20, member RAS oncogene family                                                      |
| <i>RASD1</i>     | RAS, dexamethasone-induced 1                                                           |
| <i>SEMA3A</i>    | sema domain, immunoglobulin domain (Ig), short basic domain, secreted, (semaphorin) 3A |
| <i>SIPA1L1</i>   | Signal-induced proliferation-associated 1 like 1                                       |
| <i>SLC16A3</i>   | Solute carrier family 16 (monocarboxylic acid transporters), member 3                  |
| <i>SLC24A3</i>   | Solute carrier family 24 (sodium/potassium/calcium exchanger), member 3                |
| <i>SMOX</i>      | spermine oxidase                                                                       |
| <i>SMTN</i>      | Smoothelin                                                                             |
| <i>SNX5</i>      | sorting nexin 5                                                                        |
| <i>TGM2</i>      | transglutaminase 2 (C polypeptide, protein-glutamine-gamma-glutamyltransferase)        |
| <i>TJP3</i>      | tight junction protein 3 (zona occludens 3)                                            |
| <i>TNS1</i>      | tensin 1                                                                               |
| <i>WBP2</i>      | WW domain binding protein 2                                                            |
| <i>WNK4</i>      | WNK lysine deficient protein kinase 4                                                  |
| <i>WWC1</i>      | WW, C2 and coiled-coil domain containing 1                                             |
| <i>YIPF6</i>     | Yip1 domain family, member 6                                                           |

\*Compared to Mrugala et. al. (2009) Cloning and Stem Cells

**Franco et al., Supplemental Table S6. Cartilage Specific Genes in the SmoM2 Uterus.**

| <b>Gene Symbol</b> | <b>Gene Name</b>                                            |
|--------------------|-------------------------------------------------------------|
| <i>Col11a1</i>     | collagen, type XI, alpha 1                                  |
| <i>Serpine2</i>    | serine (or cysteine) peptidase inhibitor, clade E, member 2 |
| <i>Ptgfr</i>       | prostaglandin F receptor                                    |
| <i>Has2</i>        | hyaluronan synthase 2                                       |
| <i>Ednra</i>       | endothelin receptor type A                                  |
| <i>Pdgn</i>        | podoplanin                                                  |
| <i>Rnf24</i>       | ring finger protein 24                                      |
| <i>Thbs3</i>       | thrombospondin 3                                            |
| <i>Setd5</i>       | SET domain containing 5                                     |
| <i>Cd44</i>        | CD44 antigen                                                |
| <i>Snx5</i>        | sorting nexin 5                                             |
| <i>Glis3</i>       | GLIS family zinc finger 3                                   |
| <i>Mmp3</i>        | matrix metalloproteinase 3                                  |

\*compared to Funari et. al. (2007) BMC Genomics 8:165.
